# Supplementary material for: Bis-TTF-Ge derivatives: promising linear and nonlinear optical properties, a theoretical investigation
Source: Royal Society of Chemistry journal article supplement (doi:10.1039/d2nj03671a), 2022-12-06
Supplement: d2nj03671a1.pdf [file d2nj03671a1.pdf]

## Supporting Information for:

# Linear and nonlinear optical properties of bis-TTF-Ge: Theoretical investigation

*New Journal of Chemistry, -12/2022*

Dalila Kamli<sup>1,2</sup>, Douniazed Hannachi<sup>1,3</sup>, Djamilia Samsar<sup>4</sup>, Henry Chermette<sup>5</sup>

<sup>1</sup>Laboratoire d'Electrochimie, d'Ingénierie Moléculaire et de Catalyse Redox (LEIMCR), Département d'Enseignement de Base en Technologie, Faculté de Technologie, Université Ferhat Abbas, Sétif-1, Algérie.

<sup>2</sup>Département des sciences de la matière, Faculté des Sciences, Université de kenchela, Algérie.

<sup>3</sup>Département de Chimie, Faculté des Sciences, Université Ferhat Abbas, Setif-1, Algérie.

<sup>4</sup>Institut D'Hygiène et Sécurité Industrielle, Département de Socle commun Hygiène et Sécurité Industrielle, Université de Batna-2, Algérie.

<sup>5</sup>Université de Lyon, Université Claude Bernard Lyon 1, Institut des Sciences Analytiques, UMR CNRS 5280, 69622 Villeurbanne Cedex, France.

E-mail: [douniazed\\_hannachi@univ-setif.dz](mailto:douniazed_hannachi@univ-setif.dz) (D.H.); [henry.chermette@univ-lyon1.fr](mailto:henry.chermette@univ-lyon1.fr) (H.C.)

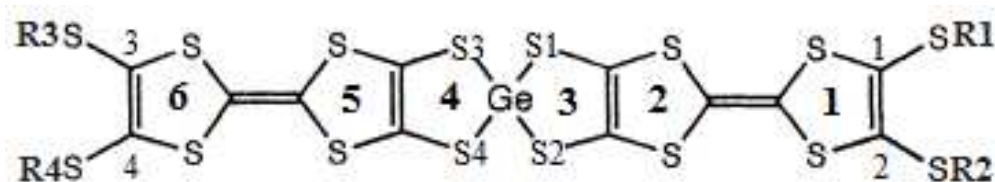

## Table of contents

|                                                                                                                                                                                                                                                                                                                                                                                                                                                                                                            |            |
|------------------------------------------------------------------------------------------------------------------------------------------------------------------------------------------------------------------------------------------------------------------------------------------------------------------------------------------------------------------------------------------------------------------------------------------------------------------------------------------------------------|------------|
| <b>Table S1.</b> Vertical transition energy ( $\Delta E_{0 \rightarrow n}$ , eV), wavelength ( $\Delta \lambda_{0 \rightarrow n}$ , nm), oscillator strengths ( $f_{0 \rightarrow n}$ , dimensionless), charge transfer ( $q^{CT}$ ), charge transfer distance ( $d^{CT}$ , Å), and dipole moment variation ( $\Delta \mu_{0 \rightarrow n}$ , D) associated to the $S_0 \rightarrow S_n$ transition, as calculated at the CAM-B3LYP/6-311g(d,p) of the studied <b>bis-TTF-Ge</b> compounds T0 to T36..... | <b>S3</b>  |
| <b>Table S2.</b> Static ( $\lambda = \infty$ ) and dynamic ( $\lambda = 1064$ nm ) first hyperpolarizability ( au) and depolarization ratio (DR), Electronic absorption energies ( E, eV) , dipole moment variation ( $\Delta \mu_{0 \rightarrow n}$ , D) associated to the $S_0 \rightarrow S_n$ transition and dominant transition of the desired excited states for Ti calculated by the sum-over-states method                                                                                         | <b>S10</b> |
| <b>Figure S1.</b> Calculated UV – vis absorption spectra of 36 bis-TTF-Ge compounds .....                                                                                                                                                                                                                                                                                                                                                                                                                  | <b>S16</b> |
| <b>Figure S2.</b> Electron density difference of bis-TTF-Ge derivatives from the ground state to the crucial excited state ( $S_n: S_0 \rightarrow S_n$ ) plotted using 0.008 au isovalues.....                                                                                                                                                                                                                                                                                                            | <b>S23</b> |
| <b>Figure S3.</b> The calculated $\beta_{HRS}$ values ( a.u) using the CAM-B3LYP functional at the different basis sets level for T36.....                                                                                                                                                                                                                                                                                                                                                                 | <b>S24</b> |
| <b>Influence of the basis set on the NLO of T36.</b> .....                                                                                                                                                                                                                                                                                                                                                                                                                                                 | <b>S25</b> |
| <b>Figure S4.</b> Correlation between static hyperpolarizability and hardness, T2,T4, T6, T7, T11, T13, T15 and T36 excepted.....                                                                                                                                                                                                                                                                                                                                                                          | <b>S26</b> |
| <b>Figure S5.</b> Relationship between the static first hyperpolarizability ( $\beta^{SOS}$ , a.u.) and the number of excited states .....                                                                                                                                                                                                                                                                                                                                                                 | <b>S28</b> |
| <b>Reference.</b> .....                                                                                                                                                                                                                                                                                                                                                                                                                                                                                    | <b>S31</b> |
| <b>The optimized cartesian coordinates and energy of all structures.</b> .....                                                                                                                                                                                                                                                                                                                                                                                                                             | <b>S32</b> |

**Table S1.** Vertical transition energy ( $\Delta E_{0 \rightarrow n}$ , eV) and wavelength ( $\Delta \lambda_{0 \rightarrow n}$ , nm), oscillator strengths ( $f_{0 \rightarrow n}$ , dimensionless), charge transfer ( $q^{CT}$ ), charge transfer distance ( $d^{CT}$ , Å) dipole moment variation ( $\Delta \mu_{0 \rightarrow n}$ , D) and Sr index associated to the S0  $\rightarrow$  Sn transition, as calculated at the CAM-B3LYP/6-311g(d,p) of the studied **bis-TTF-Ge** compounds T0 to T36

| Ti | Sn  | E(eV) | $\lambda$ (nm) | f      | $q^{ct}$ | $d^{ct}$ | Sr    | $\mu^{ct}$ | Transition                                                                | character                                                                                                                                                                                                                                                   |
|----|-----|-------|----------------|--------|----------|----------|-------|------------|---------------------------------------------------------------------------|-------------------------------------------------------------------------------------------------------------------------------------------------------------------------------------------------------------------------------------------------------------|
| T0 | S1  | 3.096 | 400            | 0.003  | 0.821    | 0.035    | 0.725 | 0.136      | 182 $\rightarrow$ 183 (65%)                                               | CT from rings 1,2,5 and 6 to 4S+Ge<br>ICT in rings 1,2,5,and 6<br>CT from rings 1,2,5 and 6 to 4S+Ge<br>IC in rings 1,2,5,and 6                                                                                                                             |
|    | S7  | 4.030 | 308            | 0.210  | 0.524    | 0.052    | 0.973 | 0.131      | 181 $\rightarrow$ 191(15%); 180 $\rightarrow$ 185(15%)                    |                                                                                                                                                                                                                                                             |
|    | S11 | 4.249 | 291            | 0.209  | 0.651    | 0.045    | 0.827 | 0.145      | 180 $\rightarrow$ 183 (27%)                                               |                                                                                                                                                                                                                                                             |
|    | S17 | 4.649 | 267            | 1.030  | 0.493    | 0.037    | 0.979 | 0.089      | 182 $\rightarrow$ 193 (24%)                                               |                                                                                                                                                                                                                                                             |
| T1 | S1  | 1.706 | 727            | 0.001  | 0.891    | 8.636    | 0.141 | 36.946     | 187 $\rightarrow$ 190(32%);185 $\rightarrow$ 190 (30%)                    | CT: from rings 1-3 to NO<br>CT: from rings 1, 2, 5 and 6 to NO<br>ICT: in rings 4-6<br>ICT: in rings 1,2,5 and 6                                                                                                                                            |
|    | S7  | 3.218 | 385            | 0.079  | 0.707    | 9.586    | 0.571 | 32.559     | 189 $\rightarrow$ 190 (H $\rightarrow$ L) : (29%)                         |                                                                                                                                                                                                                                                             |
|    | S10 | 4.034 | 307            | 0.207  | 0.534    | 1.278    | 0.966 | 3.255      | 186 $\rightarrow$ 193 (12%);188 $\rightarrow$ 193 (12%)                   |                                                                                                                                                                                                                                                             |
|    | S24 | 4.647 | 26             | 1.137  | 0.497    | 0.172    | 0.979 | 0.409      | 189 $\rightarrow$ 201(22%),188 $\rightarrow$ 199(18%)                     |                                                                                                                                                                                                                                                             |
|    | S2  | 3.043 | 407            |        |          |          |       |            | 189 $\rightarrow$ 190 (33%) 188 $\rightarrow$ 190(20%)                    |                                                                                                                                                                                                                                                             |
| T2 | S1  | 1.824 | 680            | <0.001 | 0.829    | 8.451    | 0.231 | 33.661     | 195 $\rightarrow$ 197 (23%) 193 $\rightarrow$ 197(23%)                    | CT:1,2 to NO (at R1 and R2)<br>CT:rings1-3 to NO (R1,R2), ICT in 1-3<br>CT: from rings 1-2 to NO (R1,R2)<br>ICT: in rings1,2; CT: rings 6-5 to 1,2<br>CT: from ring to NO and ICT in TTF rings<br>CT: from rings 6-5 to NO (at R1, R2)<br>ICT: in rings 6,5 |
|    | S2  | 1.947 | 637            | <0.001 | 0.804    | 8.564    | 0.234 | 33.090     | 193 $\rightarrow$ 198(22%),190 $\rightarrow$ 197(22%)                     |                                                                                                                                                                                                                                                             |
|    | S3  | 2.719 | 456            | 0.046  | 0.803    | 5.853    | 0.308 | 22.567     | 195 $\rightarrow$ 199 (74%)                                               |                                                                                                                                                                                                                                                             |
|    | S16 | 4.036 | 307            | 0.126  | 0.618    | 6.649    | 0.674 | 19.741     | 194 $\rightarrow$ 203 (15%), 196 $\rightarrow$ 208(15%)                   |                                                                                                                                                                                                                                                             |
|    | S18 | 4.088 | 303            | 0.114  | 0.559    | 0.710    | 0.965 | 1.905      | 195 $\rightarrow$ 202(10%), 196 $\rightarrow$ 204 (10%)                   |                                                                                                                                                                                                                                                             |
|    | S13 | 3.892 | 318            | <0.001 | 0.999    | 16.977   | 0.000 | 81.427     | 196 $\rightarrow$ 197 H $\rightarrow$ L (98%)                             |                                                                                                                                                                                                                                                             |
|    | S32 | 4.654 | 266            | 1.050  | 0.540    | 5.852    | 0.780 | 15.183     | 196 $\rightarrow$ 210(20%), 196 $\rightarrow$ 208(19%)                    |                                                                                                                                                                                                                                                             |
|    |     |       |                |        |          |          |       |            |                                                                           |                                                                                                                                                                                                                                                             |
| T3 | S1  | 1.896 | 654            | 0.001  | 0.888    | 11.586   | 0.142 | 49.439     | 196 $\rightarrow$ 198 (18%)                                               | CT: rings 6-5 to NO (at R3)<br>CT: rings 1-2 to NO (at R1) & 6-5 to NO (R1)<br>ICT in TTF rings (1-6)<br>CT from TTF to NO and 4S-Ge<br>ICT and CT 1,2 to 6,5 and 6,5 to 1,2<br>IC in TTF rings                                                             |
|    | S4  | 2.968 | 418            | 0.001  | 0.841    | 9.184    | 0.393 | 37.014     | 195 $\rightarrow$ 197(50%),196 $\rightarrow$ 197(H $\rightarrow$ L) (10%) |                                                                                                                                                                                                                                                             |
|    | S13 | 3.999 | 310            | 0.162  | 0.508    | 2.906    | 0.934 | 7.095      | 196 $\rightarrow$ 209(13%),194 $\rightarrow$ 203(13%)                     |                                                                                                                                                                                                                                                             |
|    | S23 | 4.239 | 292            | 0.131  | 0.505    | 0.511    | 0.990 | 2.588      | 194 $\rightarrow$ 199(15%)                                                |                                                                                                                                                                                                                                                             |
|    | S29 | 4.620 | 268            | 0.804  | 0.486    | 1.481    | 0.961 | 3.454      | 195 $\rightarrow$ 207(20%),196 $\rightarrow$ 209(21%)                     |                                                                                                                                                                                                                                                             |
|    | S46 | 5.098 | 243            | 0.126  | 0.518    | 0.383    | 0.996 | 0.951      | 194 $\rightarrow$ 203 (10%), 195 $\rightarrow$ 211(10%)                   |                                                                                                                                                                                                                                                             |
| T4 | S1  | 1.833 | 676            | <0.001 | 0.820    | 8.208    | 0.263 | 32.284     | 202 $\rightarrow$ 204 (25%)                                               | CT:rings1,2 to 2NO<br>CT:ring1,2 to 2 S-NO(R1+2)<br>CT: from rings 6,5 to NO (at R1+R2)<br>CT:from rings1,2, R1+R2to ring5,6, 4S-Ge;R3                                                                                                                      |
|    | S4  | 2.724 | 455            | 0.046  | 0.803    | 5.830    | 0.319 | 22.477     | 202 $\rightarrow$ 207 (72%)                                               |                                                                                                                                                                                                                                                             |
|    | S17 | 3.921 | 316            | <0.001 | 0.997    | 17.038   | 0.000 | 81.612     | 203 $\rightarrow$ 204(H $\rightarrow$ L) (98%)                            |                                                                                                                                                                                                                                                             |
|    | S20 | 4.010 | 309            | 0.125  | 0.576    | 6.199    | 0.715 | 17.151     | 201 $\rightarrow$ 211(13%), 203 $\rightarrow$ 216 (13%)                   |                                                                                                                                                                                                                                                             |

|    |     |       |     |        |       |       |       |        |                                     |                                          |
|----|-----|-------|-----|--------|-------|-------|-------|--------|-------------------------------------|------------------------------------------|
|    | S22 | 4.088 | 303 | 0.130  | 0.578 | 5.054 | 0.897 | 14.022 | 203 → 213 (12%)                     | CT from TTF to NO(R1,R2) and 4S-Ge       |
|    | S33 | 4.283 | 290 | 0.132  | 0.608 | 1.056 | 0.983 | 3.085  | 201→208(18%);201→206 (7%)           | CT: from ring 4-6 to NO(at R3) and 4S-Ge |
|    | S38 | 4.626 | 268 | 0.677  | 0.524 | 2.759 | 0.872 | 6.941  | 203→216 (22%),201→209 (12%)         | IC in rings 6-5 and 1-2                  |
| T5 | S1  | 1.831 | 677 | <0.001 | 0.805 | 6.489 | 0.900 | 25.050 | 208→2115(12.5%),210→211(H-L)(12.5%) | CT: from rings 1, 2,5,6 to NO groups     |
|    | S3  | 1.945 | 637 | <0.001 | 0.775 | 2.195 | 0.925 | 8.166  | 207→214(11%), 205→214(11%)          | CT: from rings 1, 2,5,6 to NO groups     |
|    | S5  | 2.725 | 455 | 0.046  | 0.794 | 1.452 | 0.935 | 5.526  | 209→216(23%);210→215(22%)           | CT: from rings 1-2, 5-6 to NO (at R1-R4) |
|    | S11 | 3.096 | 400 | 0.003  | 0.809 | 0.207 | 0.720 | 0.803  | 210→217 (67%)                       | CT: from rings 1-2,5-6 to 4S-Ge          |
|    | S41 | 4.297 | 289 | 0.202  | 0.567 | 0.132 | 0.943 | 0.359  | 208→217(24%);209→225(12%)           | CT from ring 1,2,,5 and 6 to 4S-Ge       |
|    | S47 | 4.677 | 265 | 1.521  | 0.462 | 0.106 | 0.988 | 0.236  | 209→226(23%);210→227(25%)           | ICT in TTF rings                         |

| Ti | Sn  | E(eV) | $\lambda$ (nm) | F     | $q^{ct}$ | $d^{ct}$ | Sr    | $\mu^{ct}$ | Transition                  | character                                  |
|----|-----|-------|----------------|-------|----------|----------|-------|------------|-----------------------------|--------------------------------------------|
| T6 | S1  | 3.070 | 404            | 0.003 | 0.872    | 6.729    | 0.375 | 28.067     | 188→189 (H→L) 68%           | CT: rings 6, 5 to 4S-Ge                    |
|    | S7  | 4.003 | 307            | 0.167 | 0.631    | 7.18     | 0.628 | 21.766     | 186→192 (20%)               | CT:ring65 to 1,2                           |
|    | S10 | 4.141 | 292            | 0.141 | 0.705    | 6.049    | 0.636 | 20.478     | 186→189(15%),188→197(14%)   | CT: ring 6,5,4 to 4S-Ge                    |
|    | S18 | 4.658 | 266            | 0.628 | 0.582    | 6.743    | 0.637 | 18.866     | 188→200(42%),186→192(10%)   | ICT in rings 6,5                           |
|    | S29 | 5.122 | 240            | 0.145 | 0.573    | 5.910    | 0.766 | 16.212     | 187 → 197 (13%)             | ICT in rings                               |
| T7 | S1  | 3.051 | 406            | 0.002 | 0.871    | 6.634    | 0.351 | 27.747     | 194→195(H→L)(68%)           | CT rings 6,5 to 4S-Ge                      |
|    | S7  | 4.028 | 308            | 0.163 | 0.623    | 5.961    | 0.663 | 17.829     | 194→ 207(22%), 194→198(22%) | ICT (in rings 6,5)+TC ring6-5 to 4S-Ge     |
|    | S12 | 4.260 | 291            | 0.174 | 0.618    | 1.550    | 0.847 | 4.597      | 193→201(25%),193→206(24%)   | ICT in ring 1,2 3 and S-CN (at R1, R2)     |
|    | S16 | 4.489 | 276            | 0.234 | 0.639    | 2.380    | 0.904 | 7.298      | 193→199 (32%)               | CT ring 1, 2 to S-CN (at R1, R2)           |
|    | S19 | 4.662 | 266            | 0.488 |          |          |       |            | 194→207 (33%)               | ICT (in rings 6,5)                         |
|    | S22 | 4.815 | 258            | 0.360 |          |          |       |            | 193→203(26%),193→209(14%)   | ICT in TTF rings                           |
| T8 | S1  | 3.132 | 396            | 0.004 | 0.792    | 1.963    | 0.752 | 7.467      | 194→195 (H→L) (50%)         | CT rings 6,5 to 4S-Ge                      |
|    | S7  | 4.074 | 304            | 0.429 | 0.513    | 0.320    | 0.969 | 0.784      | 193→204(10%)                | CT ring 1,2 to Ge and CN (at R4)           |
|    | S11 | 4.279 | 290            | 0.192 | 0.618    | 0.890    | 0.959 | 2.630      | 194→201(35%)                | ICT in rings 6 and 5+ CT 6,5 to CN (at R4) |
|    | S17 | 4.530 | 274            | 0.168 | 0.567    | 0.675    | 0.955 | 1.834      | 193→203 (35%)               | IC in rings 1 and 2 + CT 1,2 to CN (at R1) |
|    | S19 | 4.701 | 263            | 0.518 | 0.512    | 1.067    | 0.942 | 2.606      | 194→205(25%)                | IC in rings 6 and 5+ CT 6,5 to CN (at R4)  |
|    | S26 | 5.098 | 243            | 0.186 |          |          |       |            | 193→201 (15%)               | CT from rings 1,2 to Ge+4,5, CN (at R4)    |
| T9 | S1  | 3.107 | 398            | 0.003 | 0.680    | 1.086    | 0.862 | 3.546      | 200→201(H→L) 84%            | CT from rings 5 and 6 to 4S-Ge             |
|    | S5  | 3.421 | 362            | 0.042 | 0.781    | 4.721    | 0.505 | 17.702     | 199 → 202 87%               | CT+ICT: rings 1-2 to ring1&SCN(R1,R2)      |
|    | S8  | 4.078 | 304            | 0.151 | 0.570    | 4.392    | 0.744 | 11.908     | 200 → 212 (10%)             | ICT in 6,5 and CT 6,5 to 1,2               |
|    | S12 | 4.304 | 288            | 0.178 | 0.593    | 3.380    | 0.900 | 9.545      | 200→209 (20%)               | CT from rings 6, 5 to 4S-Ge                |
|    | S16 | 4.478 | 277            | 0.191 | 0.658    | 2.517    | 0.878 | 7.910      | 197→201(28%),199→207 (17%)  | CT from 1-3 to CN (at R1, R2) and 4S-Ge    |

|     |     |       |     |        |       |        |       |        |                              |                                                                                                                                                                                                                                    |
|-----|-----|-------|-----|--------|-------|--------|-------|--------|------------------------------|------------------------------------------------------------------------------------------------------------------------------------------------------------------------------------------------------------------------------------|
|     | S22 | 4.813 | 258 | 0.360  | 0.617 | 3.296  | 0.692 | 9.754  | 199→203 (20%)                | ICT in rings 1-3                                                                                                                                                                                                                   |
| T10 | S1  | 3.086 | 402 | 0.005  | 0.747 | 6.418  | 0.627 | 23.035 | 206 → 210 (42%)              | ICT in TTF rings<br>CT from rings 5, 6 to 4S-G<br>CT from ring 1-3 to C-S-COCN (R1,R2)<br>CT from rings R6-R5 to 4S- Ge<br>CT from TTF rings and to 4S- Ge<br>IC in rings 6 and 5<br>CT rings 6,5 to C-S-COCN (at R1,R2) and C3-C4 |
|     | S3  | 3.141 | 395 | 0.005  | 0.796 | 4.524  | 0.700 | 17.24  | 206→207 (H→L) 65%            |                                                                                                                                                                                                                                    |
|     | S6  | 3.414 | 363 | 0.043  | 0.803 | 2.122  | 0.718 | 8.182  | 205 → 208 (70%)              |                                                                                                                                                                                                                                    |
|     | S13 | 4.305 | 288 | 0.204  | 0.594 | 4.507  | 0.845 | 12.859 | 206→215 (20%)                |                                                                                                                                                                                                                                    |
|     | S15 | 4.451 | 279 | 0.198  | 0.617 | 0.416  | 0.952 | 1.234  | 204→207 (39%)                |                                                                                                                                                                                                                                    |
|     | S22 | 4.794 | 259 | 0.797  | 0.540 | 1.437  | 0.926 | 3.725  | 206→219 (13%)                |                                                                                                                                                                                                                                    |
|     | S32 | 5.135 | 241 | 0.129  | 0.563 | 3.650  | 0.891 | 9.870  | 206 → 208 (17%)              |                                                                                                                                                                                                                                    |
| T11 | S1  | 3.076 | 403 | 0.003  | 0.861 | 6.645  | 0.388 | 27.478 | 195→197 (H→L) 65%            | CT from 6 and 5 to 4S and Ge<br>IC in rings 6 and 5<br>TC from ring 6,5 to 4S-Ge<br>CT from 6 and 5 to COCN<br>IC in rings 6 and 5<br>CT from rings 1 and 2 to COCN                                                                |
|     | S8  | 4.032 | 308 | 0.188  | 0.530 | 3.260  | 0.922 | 8.295  | 195→207(20%),193→200(18%)    |                                                                                                                                                                                                                                    |
|     | S13 | 4.238 | 293 | 0.141  | 0.601 | 4.082  | 0.917 | 11.783 | 193 → 197 (23%)              |                                                                                                                                                                                                                                    |
|     | S19 | 4.537 | 273 | <0.001 | 0.993 | 17.300 | 0.000 | 82.506 | 195 → 196 (98%)              |                                                                                                                                                                                                                                    |
|     | S20 | 4.653 | 266 | 0.919  | 0.505 | 1.946  | 0.950 | 4.718  | 195-207(26%),194→205(9%)     |                                                                                                                                                                                                                                    |
|     | S33 | 5.136 | 241 | 0.186  | 0.588 | 2.846  | 0.802 | 8.024  | 194 → 208 (16%)              |                                                                                                                                                                                                                                    |
| T12 | S1  | 2.231 | 556 | 0.001  | 0.675 | 1.966  | 0.662 | 6.372  | 206→215 (72%)                | IC in COCN group (at R1)<br>CT from 6 and 5 rings to one COCN<br>CT from ring 6,5 to ring 1, 2 and 4s-Ge<br>CT from rings 6, 5,4 too 4S and Ge<br>CT from rings 1,2,3 too 4S and Ge<br>IC in COCN groups                           |
|     | S9  | 3.287 | 377 | <0.001 | 0.998 | 17.102 | 0.000 | 81.95  | 214 → 215 (H→L) 98%          |                                                                                                                                                                                                                                    |
|     | S14 | 4.008 | 309 | 0.182  | 0.660 | 7.786  | 0.719 | 24.679 | 118 → 216 (25%)              |                                                                                                                                                                                                                                    |
|     | S20 | 4.200 | 295 | 0.205  | 0.708 | 7.483  | 0.590 | 25.392 | 212→217 (32%)                |                                                                                                                                                                                                                                    |
|     | S31 | 4.579 | 271 | 0.394  | 0.622 | 0.991  | 0.856 | 2.958  | 211→217 (20%)                |                                                                                                                                                                                                                                    |
|     | s45 | 5.059 | 245 | 0.190  | 0.560 | 5.439  | 0.791 | 14.630 | 209 → 218 (25%)              |                                                                                                                                                                                                                                    |
| T13 | S1  | 3.087 | 402 | 0.003  | 0.661 | 4.701  | 0.844 | 14.923 | 208→215(27%)                 | CT in rings TTF<br>CT from rings 5-6 to 4S-Ge<br>CT from rings to COCN groups<br>IC in rings<br>CT from rings to 4S-Ge group<br>IC in rings                                                                                        |
|     | S3  | 3.117 | 398 | 0.005  | 0.803 | 3.582  | 0.863 | 13.774 | 207→210 (63%)                |                                                                                                                                                                                                                                    |
|     | S6  | 3.457 | 359 | 0.194  | 0.900 | 1.938  | 0.843 | 8.374  | 207→220(35%),208→209(22%)    |                                                                                                                                                                                                                                    |
|     | S9  | 4.043 | 307 | 0.142  | 0.508 | 1.880  | 0.936 | 4.585  | 207→219 (24%)                |                                                                                                                                                                                                                                    |
|     | S17 | 4.309 | 288 | 0.764  | 0.575 | 1.699  | 0.968 | 4.684  | 208→221(22%);208→219(21%)    |                                                                                                                                                                                                                                    |
|     | S21 | 4.670 | 266 | 0.140  | 0.517 | 3.009  | 0.909 | 7.466  | 207→ 225(22%),206 → 215(13%) |                                                                                                                                                                                                                                    |
| T14 | S1  | 3.097 | 400 | 0.014  | 0.713 | 4.044  | 0.791 | 13.843 | 220→226(32%), 220→228(30%)   | CT from ring1-3 to S-COCN (at R1,R2)<br>CT from rings 4-6 to S-COCN (at R3)<br>CT from ring1-3 to S-COCN (at R1,R2)<br>IC in rings 6 and 5<br>CT from ring 6, 5 to S-COCN (at R1)<br>IC in rings                                   |
|     | S6  | 3.314 | 374 | 0.060  | 0.900 | 6.832  | 0.268 | 29.524 | 221→223 (79%)                |                                                                                                                                                                                                                                    |
|     | S9  | 3.790 | 327 | 0.100  | 0.752 | 4.598  | 0.697 | 16.609 | 220 → 225 (42%)              |                                                                                                                                                                                                                                    |
|     | S10 | 4.093 | 303 | 0.205  | 0.656 | 6.139  | 0.632 | 19.899 | 221→230 (17%)                |                                                                                                                                                                                                                                    |
|     | S19 | 4.334 | 286 | 0.092  | 0.771 | 14.080 | 0.285 | 52.145 | 221 → 222 (H→L) 52%          |                                                                                                                                                                                                                                    |
|     | S25 | 4.668 | 266 | 0.650  | 0.558 | 5.550  | 0.853 | 14.876 | 221→236 (11%)                |                                                                                                                                                                                                                                    |
| T15 | S1  | 3.098 | 400 | 0.015  | 0.722 | 2.246  | 0.739 | 7.784  | 234→235(H→L)32%              | CT from rings 1-3 to S-COCN (at R1,R2)<br>CT from rings 4-6 to COCN (at R3)<br>IC in rings 1, 2                                                                                                                                    |
|     | S8  | 3.528 | 351 | 0.041  | 0.912 | 6.937  | 0.248 | 30.399 | 233 → 237 (76%)              |                                                                                                                                                                                                                                    |
|     | S11 | 4.133 | 300 | 0.197  | 0.567 | 1.482  | 0.901 | 4.037  | 231→242 (16%)                |                                                                                                                                                                                                                                    |

|     |                               |                                           |                                 |                                           |                                            |                                           |                                           |                                               |                                                                                                               |                                                                                                                                           |
|-----|-------------------------------|-------------------------------------------|---------------------------------|-------------------------------------------|--------------------------------------------|-------------------------------------------|-------------------------------------------|-----------------------------------------------|---------------------------------------------------------------------------------------------------------------|-------------------------------------------------------------------------------------------------------------------------------------------|
|     | S28<br>S45                    | 4.649<br>5.134                            | 267<br>241                      | 0.506<br>0.183                            | 0.602                                      | 2.818                                     | 0.758                                     | 8.147                                         | 233→246(30%),233→247(10%)<br>234 → 250 (10%)                                                                  | IC<br>IC                                                                                                                                  |
| T16 | S1<br>S7<br>S11<br>S18        | 3.082<br>4.020<br>4.246<br>4.644          | 402<br>308<br>292<br>267        | 0.003<br>0.221<br>0.179<br>1.066          | 0.858<br>0.610<br>0.665<br>0.519           | 6.540<br>3.628<br>5.202<br>1.651          | 0.400<br>0.823<br>0.800<br>0.963          | 26.862<br>10.635<br>16.581<br>4.120           | 189→190 (H→L) 65%<br>186→191 22%<br>187→190 (H-2→L) 28%<br>189→201(17%), 186→191(16%)                         | CT from ring 6, 5 to 4S-Ge<br>IC in rings 1 and 2<br>CT from rings 1, 2 to 4S-Ge<br>IC in rings                                           |
| T17 | S1<br>S7<br>S11<br>S19<br>S33 | 3.065<br>4.032<br>4.230<br>4.652<br>5.169 | 404<br>307<br>293<br>267<br>240 | 0.003<br>0.173<br>0.114<br>0.942<br>0.135 | 0.869<br>0.650<br>0.657<br>0.533<br>0.622  | 6.778<br>8.709<br>5.953<br>5.845<br>2.281 | 0.389<br>0.551<br>0.813<br>0.826<br>0.751 | 28.212<br>27.195<br>18.754<br>14.951<br>6.812 | 196→197 (H→L) 67%<br>196→209(20%), 194→201(12%)<br>194→197 (H-2→L) 34%<br>193→199 (20%)                       | CT from rings 6, 5 to 4s Ge<br>IC in rings 6, 5<br>CT from rings 6,5 to 4s Ge<br>IC in rings 6, 5                                         |
| T18 | S1<br>S7<br>S11<br>S19<br>S32 | 3.119<br>4.018<br>4.275<br>4.641<br>5.167 | 398<br>309<br>290<br>267<br>240 | 0.003<br>0.295<br>0.218<br>1.040<br>0.113 | 0.8004<br>0.558<br>0.639<br>0.536<br>0.549 | 1.281<br>0.723<br>0.862<br>0.250<br>0.656 | 0.739<br>0.963<br>0.946<br>0.968<br>0.941 | 4.946<br>1.945<br>2.647<br>0.643<br>1.729     | 196→197 (H→L)52%<br>194→199(14%),193→198(12%)<br>194→197(22%), 195→205(21%)<br>196→209 (17%)<br>196→214 (12%) | CT from rings 1,2,5,6 to 4s-Ge<br>IC in rings 1,2,3,4,5,6<br>CT from rings 1,2,5,6 to 4s-Ge<br>IC in rings 1,2,5,6<br>IC in rings 1,2,5,6 |
| T19 | S1<br>S8<br>S12<br>S20        | 3.117<br>4.091<br>4.285<br>4.651          | 398<br>303<br>289<br>267        | 0.004<br>0.172<br>0.194<br>0.779          | 0.831<br>0.669<br>0.596<br>0.572           | 5.726<br>5.704<br>2.085<br>3.518          | 0.537<br>0.670<br>0.965<br>0.871          | 22.867<br>18.314<br>5.959<br>9.611            | 203→204 (H→L) 65%<br>202→208 (23%)<br>203→212 (23%)<br>203→216 (24%)                                          | CT from rings 6,5 to 4S-Ge<br>CT from rings 1-3 to 4-6<br>Mixing IC in ring1+CT ring6,5 to 4S-Ge<br>IC in rings 6 and 5                   |
| T20 | S1<br>S7<br>S13<br>S21        | 3.125<br>4.074<br>4.316<br>4.666          | 397<br>304<br>278<br>266        | 0.004<br>0.386<br>0.247<br>0.928          | 0.786<br>0.581<br>0.593<br>0.527           | 3.243<br>0.315<br>0.270<br>0.041          | 0.805<br>0.942<br>0.973<br>0.972          | 4.816<br>0.879<br>0.769<br>0.104              | 210→211 (H→L) 56%<br>210→216 22%<br>210→220(14%), 208→211(14%)<br>210→225, 207→214 (22%)                      | CT from ring 6 and 5 to 4S-Ge<br>CT from ring 6 and 5 to CHO groups<br>CT from rings to 4S-Ge<br>IC in rings                              |

| Ti  | Sn                            | E(eV)                                     | λ(nm)                           | f                                          | q <sup>ct</sup>                           | d <sup>ct</sup>                            | Sr                                        | μ <sup>ct</sup>                                | Transition                                                                                         | character                                                                                                                                                                                    |
|-----|-------------------------------|-------------------------------------------|---------------------------------|--------------------------------------------|-------------------------------------------|--------------------------------------------|-------------------------------------------|------------------------------------------------|----------------------------------------------------------------------------------------------------|----------------------------------------------------------------------------------------------------------------------------------------------------------------------------------------------|
| T21 | S1<br>S9<br>S12<br>S14<br>S21 | 2.854<br>4.035<br>4.092<br>4.207<br>4.653 | 434<br>307<br>303<br>295<br>266 | 0.083<br>0.145<br>0.125<br><0.001<br>1.028 | 0.831<br>0.617<br>0.559<br>0.999<br>0.525 | 5.372<br>0.729<br>4.421<br>15.939<br>4.526 | 0.369<br>0.614<br>0.831<br>0.000<br>0.876 | 21.438<br>21.516<br>11.856<br>76.256<br>11.361 | 192→194 (87%)<br>193→205 (21%)<br>190→197 (22%)<br>193→194 (H→L) 98%<br>193→205(23%), 192→203 (8%) | CT from rings 1,2 to SNO <sub>2</sub><br>IC in rings 6 and 5<br>CT from rings 1,2 to SNO <sub>2</sub> +CT Ring1,2 to ring6,5<br>CT from rings 6, 5 to SNO <sub>2</sub> group<br>ICT in rings |

|     |                                                   |                                                                      |                                                      |                                                                       |                                                                      |                                                                       |                                                                      |                                                                             |                                                                                                                                                                                              |                                                                                                                                                                                                                                                                                                                                                                          |
|-----|---------------------------------------------------|----------------------------------------------------------------------|------------------------------------------------------|-----------------------------------------------------------------------|----------------------------------------------------------------------|-----------------------------------------------------------------------|----------------------------------------------------------------------|-----------------------------------------------------------------------------|----------------------------------------------------------------------------------------------------------------------------------------------------------------------------------------------|--------------------------------------------------------------------------------------------------------------------------------------------------------------------------------------------------------------------------------------------------------------------------------------------------------------------------------------------------------------------------|
| T22 | S1<br>S2<br>S6<br>S11<br>S12<br>S18<br>S23<br>S25 | 2.239<br>3.059<br>3.421<br>3.971<br>4.031<br>4.234<br>4.505<br>4.658 | 554<br>405<br>362<br>312<br>308<br>293<br>275<br>266 | 0.034<br>0.003<br><0.001<br>0.113<br>0.127<br>0.171<br>0.116<br>0.907 | 0.830<br>0.869<br>0.969<br>0.883<br>0.610<br>0.666<br>0.613<br>0.532 | 5.647<br>6.583<br>15.746<br>6.229<br>5.523<br>6.057<br>3.561<br>5.594 | 0.251<br>0.349<br>0.000<br>0.283<br>0.699<br>0.803<br>0.872<br>0.738 | 22.492<br>27.489<br>73.084<br>26.408<br>16.182<br>19.384<br>10.485<br>5.620 | 203→205 (92%)<br>204→206(67%), 202→206(22%)<br>204 →205 (H→L) 95%<br>203→207 (54%)<br>204→218(23%),202→211(17%)<br>202→206(28%); 204→206(20%)<br>201→206 (39%)<br>204→218(35%), 202→211(11%) | CT from rings 1,2 to two NO <sub>2</sub> groups<br>CT from 5-6 to 4S-Ge<br>CT from rings 4-6 to two NO <sub>2</sub> groups<br>CT from rings 1,2 to two NO <sub>2</sub> groups<br>ICT in rings 5-6<br>CT from 5-6 to 4S-Ge<br>CT from 1-2 to 4S-Ge<br>ICT in rings 5-6<br>ICT in rings 1 and 2                                                                            |
| T23 | S1<br>S13<br>S19<br>S25<br>S34                    | 2.867<br>4.084<br>4.316<br>4.666<br>4.990                            | 432<br>304<br>287<br>266<br>248                      | 0.123<br>0.312<br>0.261<br>1.139<br>0.211                             | 0.829<br>0.522<br>0.604<br>0.920<br>0.570                            | 3.650<br>0.578<br>0.426<br>0.332<br>0.611                             | 0.885<br>0.969<br>0.856<br>0.970<br>0.959                            | 14.512<br>1.446<br>1.228<br>0.782<br>1.671                                  | 204→205 (H→L) 34%<br>204→212(10%), 203→215(10%)<br>202→207 (20%)<br>204→217(20%),203→216(11%)<br>199→205 (16%)                                                                               | CT from rings 1,2,5,6 to NO <sub>2</sub> (at R1 and R4)<br>ICT in rings 1,2,5,6<br>CT from rings 1,2,3,4,5,6, to 4S-Ge<br>ICT in rings 1,2,5,6<br>CT from rings 6, 5 to NO <sub>2</sub> (at R1 and R4)                                                                                                                                                                   |
| T24 | S1<br>S2<br>S8<br>S13<br>S15<br>S28<br>S49        | 2.262<br>2.869<br>3.603<br>3.993<br>4.085<br>4.669<br>5.163          | 548<br>432<br>344<br>310<br>304<br>266<br>240        | 0.034<br>0.086<br><0.001<br>0.121<br>0.171<br>1.171<br>0.117          | 0.832<br>0.828<br>0.999<br>0.875<br>0.627<br>0.535<br>0.607          | 5.627<br>5.318<br>15.685<br>6.053<br>6.106<br>5.627<br>4086           | 0.257<br>0.356<br>0.000<br>0.383<br>0.664<br>0.797<br>0.763          | 22.476<br>21.022<br>75.300<br>25.439<br>18.376<br>14.462<br>11.923          | 214→216 (92%)<br>215→217 (89 %)<br>215→216 (H→L) 98%<br>214→219 (54%)<br>215→225 (17%)<br>215→229 (17%)<br>212→ 223 (32%)                                                                    | CT from rings 2-3 to NO <sub>2</sub> (at R1, R2)<br>CT from rings 4-6 to NO <sub>2</sub> (at R3)<br>CT from rings 4-6 to NO <sub>2</sub> (at R1, R2)<br>CT from rings 2-3 to NO <sub>2</sub> (at R1, R2)<br>ICT in rings 4, 5 and 6<br>ICT in rings 1,2 and 3<br>ICT in rings 1, 2 and 3                                                                                 |
| T25 | S1<br>S2<br>S3<br>S9<br>S19<br>S29<br>S31         | 2.366<br>2.366<br>3.150<br>3.811<br>4.148<br>4.488<br>4.662          | 524<br>524<br>394<br>325<br>299<br>276<br>266        | 0.036<br>0.036<br>0.005<br><0.001<br>0.337<br>0.124<br>0.790          | 0.838<br>0.838<br>0.787<br>0.916<br>0.582<br>0.603<br>0.555          | 7.662<br>7.626<br>0.129<br>13.204<br>0.718<br>0.321<br>2.508          | 0.529<br>0.550<br>0.757<br>0.143<br>0.931<br>0.836<br>0.954          | 30.850<br>30.538<br>0.487<br>58.126<br>2.004<br>0.928<br>6.658              | 225→227 (79%)<br>226 -> 222 (79%)<br>225→229 (37%), 226→229 (37%)<br>226→227 (H→L) 84%<br>225→238 (15%)<br>224 → 229 (40%)<br>215→228(12%); 216→227(12%)                                     | CT from rings 2-3 to C-S-NO <sub>2</sub> (R1, R2)<br>CT from rings 5-6 to C-S-NO <sub>2</sub> (R3, R4)<br>CT from rings 1-2 and 5-6 to 4S-Ge<br>CT from rings 5, 6 to C-S-NO <sub>2</sub> (R1, R2)<br>CT from rings 1-3 to 4-6 +ICT in rings 1-3<br>CT from rings to 4S-Ge<br>CT from rings 2-3 and 5-6 to C-S-NO <sub>2</sub> (at R3 and R4)<br>and ICT in rings1 and 6 |
| T26 | S1<br>S7<br>S12<br>S17<br>S52                     | 3.083<br>4.030<br>4.239<br>4.623<br>5.795                            | 402<br>308<br>293<br>268<br>214                      | 0.003<br>0.332<br>0.169<br>0.870<br>0.028                             | 0.857<br>0.536<br>0.659<br>0.544                                     | 6.448<br>4.420<br>4.690<br>6.905                                      | 0.454<br>0.907<br>0.811<br>0.754                                     | 26.428<br>11.286<br>14.780<br>17.888                                        | 186→187 (H→L) 63%<br>186→195 (16%)<br>184→187 (27%)<br>186→195 (16%)<br>183→192 (28%)                                                                                                        | CT from rings 1, 2 to 4s-Ge<br>Mixing IC in ring1,2, CT 1-3 To 4-6<br>CT from rings 1,2 to 4S-Ge<br>Mixing: IC in rings 1,2; CT from 1, 2 to 6,5<br>IC in rings 6,5                                                                                                                                                                                                      |
| T27 | S1<br>S7<br>S11<br>S17                            | 3.020<br>3.993<br>4.173<br>4.612                                     | 411<br>311<br>297<br>269                             | 0.002<br>0.135<br>0.123<br>0.503                                      | 0.877<br>0.744<br>0.675<br>0.629                                     | 6.741<br>8.137<br>7.065<br>7.423                                      | 0.349<br>0.466<br>0.608<br>0.602                                     | 28.401<br>29.066<br>22.913<br>22.439                                        | 190→191 (H→L) 67%<br>190→193 (16%)<br>188→191 (25%)                                                                                                                                          | CT from rings 1,2 to 4S-Ge<br>CT from rings 1-3 to 4-6<br>CT from rings 1,2 to 4S-Ge<br>Mixing:CT from rings 1,2 to 6,5+IC in 1,2                                                                                                                                                                                                                                        |

|     |                              |                                           |                                 |                                           |                                  |                                  |                                  |                                      |                                                                                           |                                                                                                                     |
|-----|------------------------------|-------------------------------------------|---------------------------------|-------------------------------------------|----------------------------------|----------------------------------|----------------------------------|--------------------------------------|-------------------------------------------------------------------------------------------|---------------------------------------------------------------------------------------------------------------------|
|     | S54                          | 5.794                                     | 214                             | 0.047                                     |                                  |                                  |                                  |                                      | 190→201 (26%)<br>180 →196 (10%)                                                           | IC in rings 6,5                                                                                                     |
| T28 | S1<br>S7<br>S17<br>S54       | 3.050<br>4.031<br>4.605<br>5.821          | 406<br>308<br>269<br>213        | 0.002<br>0.246<br>0.652<br>0.038          | 0.852<br>0.609<br>0.515          | 6.211<br>5.032<br>3.235          | 0.468<br>0.848<br>0.881          | 25.416<br>14.727<br>8.004            | 190→191 (H→L) 65%<br>190→192 (19%)<br>190→202 (20%)<br>180→193 (6%)                       | CT from rings 1-2, to 4S-Ge<br>CT from rings 1-2 to 4S-Ge<br>IC in rings 1,2<br>IC                                  |
| T29 | S1<br>S7<br>S8<br>S17<br>S51 | 3.026<br>4.002<br>4.045<br>4.611<br>5.687 | 410<br>309<br>307<br>269<br>218 | 0.002<br>0.151<br>0.165<br>0.723<br>0.029 | 0.874<br>0.738<br>0.573<br>0.509 | 6.746<br>8.838<br>6.394<br>3.931 | 0.373<br>0.461<br>0.699<br>0.891 | 28.277<br>31.299<br>17.853<br>9.598  | 194→195 (H→L) 67%<br>194→196 (19%)<br>193→204 (18%)<br>194→206 (20%)<br>188→195 (19%)     | CT from rings 1,2 to 4S-Ge<br>CT from rings 1,2 to 4S-Ge + 6, 5 rings<br>IC in rings 6, 5<br>IC in rings 1; 2<br>IC |
| T30 | S1<br>S7<br>S8<br>S19<br>S51 | 3.039<br>4.016<br>4.068<br>4.681<br>5.687 | 408<br>309<br>308<br>264<br>218 | 0.002<br>0.146<br>0.163<br>0.555<br>0.022 | 0.873<br>0.734<br>0.671<br>0.573 | 6.537<br>6.854<br>6.826<br>6.783 | 0.356<br>0.530<br>0.640<br>0.644 | 27.177<br>24.012<br>21.888<br>18.660 | 198→199 (H→L) 65%<br>198 -> 201 (27%)<br>197→201 (30%)<br>197→208 (30%)<br>188→ 204 (39%) | CT from rings 1-2 to 4S-Ge<br>CT from rings 1-2 to 4S-Ge<br>CT from rings 1,2 to 4S-Ge<br>IC in rings 1, 2<br>IC    |

| Ti  | Sn  | E(eV) | $\lambda$ (nm) | f     | $q^{ct}$ | $d^{ct}$ | Sr    | $\mu^{ct}$ | Transition                 | Character                                                                                                                            |
|-----|-----|-------|----------------|-------|----------|----------|-------|------------|----------------------------|--------------------------------------------------------------------------------------------------------------------------------------|
| T31 | S1  | 3.081 | 402            | 0.003 | 0.870    | 6.972    | 0.367 | 29.120     | 194→ 195 (H→L) 62%         | CT from rings 1, 2 to 4S-Ge<br>IC in rings 1 and 2<br>CT from rings 1-3 to 4-6<br>IC in rings 1,2 + CT: from rings 1,2 to 5, 6<br>IC |
|     | S5  | 3.855 | 321            | 0.068 | 0.599    | 1.022    | 0.788 | 2.942      | 194 → 199 (40%)            |                                                                                                                                      |
|     | S7  | 4.023 | 308            | 0.319 | 0.593    | 7.924    | 0.639 | 22.565     | 194 →203 (20%)             |                                                                                                                                      |
|     | S18 | 4.616 | 268            | 0.720 | 0.551    | 8.192    | 0.654 | 21.668     | 194→205 (15%)              |                                                                                                                                      |
|     | S53 | 5.788 | 214            | 0.038 |          |          |       |            | 184→200 (19%)              |                                                                                                                                      |
| T32 | S1  | 3.027 | 410            | 0.002 | 0.893    | 7.276    | 0.308 | 31.218     | 206→207 (H→L) 65%          | CT from rings 1,2 to 4S-Ge<br>CT from rings 1-3 to 4-6<br>IC in rings 6, 5<br>IC in rings 6, 5                                       |
|     | S7  | 3.998 | 310            | 0.201 | 0.749    | 9.054    | 0.405 | 32.562     | 206→209(16%), 206→208(16%) |                                                                                                                                      |
|     | S19 | 4.663 | 266            | 0.755 | 0.543    | 4.419    | 0.873 | 11.515     | 205→216(19%), 205→215(19%) |                                                                                                                                      |
|     | S57 | 5.794 | 214            | 0.064 |          |          |       |            | 195→211 (20%)              |                                                                                                                                      |
| T33 | S1  | 3.089 | 401            | 0.003 | 0.843    | 4.628    | 0.657 | 18.658     | 206→207 (H→L) 65%          | CT from rings 1,2 to 4S-Ge<br>CT from rings 1-3 to 4-6<br>IC in rings 1,2 + CT from rings 1,2 to 5.6<br>IC                           |
|     | S7  | 4.021 | 308            | 0.420 | 0.522    | 3.447    | 0.943 | 8.593      | 205→215 (20%)              |                                                                                                                                      |
|     | S19 | 4.614 | 269            | 0.777 | 0.492    | 1.358    | 0.969 | 3.195      | 206→217 (14%)              |                                                                                                                                      |
|     | S51 | 5.711 | 217            | 0.227 |          |          |       |            | 196→ 210 (13%)             |                                                                                                                                      |



|     |                               |                                           |                                 |                                           |                          |                         |                         |                            |                                                                                                                          |                                                                                                 |
|-----|-------------------------------|-------------------------------------------|---------------------------------|-------------------------------------------|--------------------------|-------------------------|-------------------------|----------------------------|--------------------------------------------------------------------------------------------------------------------------|-------------------------------------------------------------------------------------------------|
| T34 | S1<br>S7<br>S19<br>S55        | 3.026<br>3.981<br>4.618<br>5.706          | 410<br>311<br>268<br>217        | 0.003<br>0.219<br>0.839<br>0.143          | 0.896<br>0.689<br>0.524  | 7.178<br>8.247<br>6.620 | 0.309<br>0.542<br>0.830 | 30.898<br>27.285<br>16.657 | 218→219 (H→L) 65%<br>218→227(16%),218→220(16%<br>217→227(16%), 215→220(16%<br>206 → 221 (13%)                            | CT from rings 1, 2 to 4S-Ge<br>CT from rings 1-3 to 4-6<br>IC in rings 1, 2<br>IC in rings 1, 2 |
| T35 | S1<br>S7<br>S19<br>S20<br>S49 | 3.055<br>3.989<br>4.619<br>4.662<br>5.572 | 406<br>311<br>268<br>266<br>223 | 0.003<br>0.315<br>0.521<br>0.326<br>0.121 | 0.869<br>0.568<br>0.5523 | 5.083<br>2.059<br>7.036 | 0.645<br>0.951<br>0.831 | 21.208<br>5.619<br>17.671  | 230→231 (H→L) 65%<br>229→239(16%), 228→233(16%<br>230→240(10%), 226→236(10%<br>229→239(12%), 229→243(12%<br>228→237 (8%) | CT from rings 1, 2 to 4S-Ge<br>IC in rings<br>IC in rings<br>IC in rings                        |
| T36 | S1<br>S7<br>S17               | 3.083<br>4.062<br>4.672                   | 401<br>305<br>265               | 0.003<br>0.400<br>0.966                   | 0.843<br>0.618<br>0.513  | 4.578<br>0.034<br>0.070 | 0.669<br>0.908<br>0.975 | 18.492<br>0.102<br>0.173   | 198 → 199 (H→L) 65%<br>198 → 200 (16%)<br>197 → 207 (20%)                                                                | CT from one TTF to 4S-Ge group<br>IC in rings<br>IC n rings                                     |

**Table S2.** Static ( $\lambda = \infty$ ) and dynamic ( $\lambda = 1064 \text{ nm}$ ) first hyperpolarizability ( au) and depolarization ratio (DR), Electronic absorption energies ( E, eV) , dipole moment variation ( $\Delta\mu_{0 \rightarrow n}$ , D) associated to the  $S_0 \rightarrow S_n$  transition and dominant transition of the desired excited states for Ti calculated by the sum-over-states method

|          | Ti | $DR_{SOS}^{\lambda=\infty}$ | $\beta_{HRS,SOS}^{\lambda=\infty}$ | $DR_{SOS}^{\lambda=1064}$ | $\beta_{SOS}^{\lambda=1064}$ | $S_0 \rightarrow S_n$    | $S_n$      | $\Delta E_{0 \rightarrow n}$ | $\Delta\mu_{0 \rightarrow n}$ |
|----------|----|-----------------------------|------------------------------------|---------------------------|------------------------------|--------------------------|------------|------------------------------|-------------------------------|
| <b>a</b> | T1 | 4.19                        | 795                                | 5.03                      | 1930                         | $S_0 \rightarrow S_1$    | S1         | 1.706                        | 0.124                         |
|          |    |                             |                                    |                           |                              | $S_0 \rightarrow S_7$    | S7         | 3.217                        | 1.00                          |
|          |    |                             |                                    |                           |                              | $S_0 \rightarrow S_{10}$ | S10        | 4.033                        | 1.446                         |
|          |    |                             |                                    |                           |                              | $S_0 \rightarrow S_{17}$ | <i>S17</i> | <i>4.245</i>                 | <i>1.117</i>                  |
| <b>b</b> | T2 | 5.51                        | 1239                               | 5.02                      | 2801                         | $S_0 \rightarrow S_1$    | S1         | 1.824                        | 0.078                         |
|          |    |                             |                                    |                           |                              | $S_0 \rightarrow S_{16}$ | S16        | 4.035                        | 1.127                         |
|          |    |                             |                                    |                           |                              | $S_0 \rightarrow S_{32}$ | <i>S32</i> | <i>4.654</i>                 | <i>3.035</i>                  |
| <b>c</b> | T3 | 1.60                        | 427                                | 1.61                      | 966                          | $S_0 \rightarrow S_1$    | S1         | 1.895                        | 0.105                         |
|          |    |                             |                                    |                           |                              | $S_0 \rightarrow S_{13}$ | S13        | 3.998                        | 1.284                         |
|          |    |                             |                                    |                           |                              | $S_0 \rightarrow S_{23}$ | S23        | 4.239                        | 1.122                         |
|          |    |                             |                                    |                           |                              | $S_0 \rightarrow S_{29}$ | <i>S29</i> | <i>4.619</i>                 | <i>2.665</i>                  |
| <b>d</b> | T4 | 4.15                        | 1046                               | 2.98                      | 2550                         | $S_0 \rightarrow S_1$    | S1         | 1.833                        | 0.088                         |
|          |    |                             |                                    |                           |                              | $S_0 \rightarrow S_{20}$ | S20        | 4.009                        | 1.128                         |
|          |    |                             |                                    |                           |                              | $S_0 \rightarrow S_{22}$ | S22        | 4.087                        | 1.138                         |
|          |    |                             |                                    |                           |                              | $S_0 \rightarrow S_{33}$ | S33        | 4.282                        | 1.119                         |
|          |    |                             |                                    |                           |                              | $S_0 \rightarrow S_{38}$ | <i>S38</i> | <i>4.626</i>                 | <i>2.444</i>                  |
| <b>e</b> | T5 | 1.81                        | 776                                | 1.15                      | 2956                         | $S_0 \rightarrow S_1$    | S1         | 1.831                        | 0.084                         |
|          |    |                             |                                    |                           |                              | $S_0 \rightarrow S_5$    | S5         | 2.724                        | 0.828                         |
|          |    |                             |                                    |                           |                              | $S_0 \rightarrow S_{27}$ | S27        | 4.087                        | 1.282                         |
|          |    |                             |                                    |                           |                              | $S_0 \rightarrow S_{41}$ | S41        | 4.297                        | 1.387                         |
|          |    |                             |                                    |                           |                              | $S_0 \rightarrow S_{47}$ | <i>S47</i> | <i>4.676</i>                 | <i>3.642</i>                  |
| <b>A</b> | T6 | 4.28                        | 555                                | 4.39                      | 889                          | $S_0 \rightarrow S_1$    | S1         | 3.069                        | 0.190                         |
|          |    |                             |                                    |                           |                              | $S_0 \rightarrow S_7$    | S7         | 4.033                        | 1.300                         |
|          |    |                             |                                    |                           |                              | $S_0 \rightarrow S_{11}$ | S11        | 4.240                        | 1.163                         |
|          |    |                             |                                    |                           |                              | $S_0 \rightarrow S_{18}$ | <i>S18</i> | <i>4.658</i>                 | <i>2.345</i>                  |
| <b>B</b> | T7 | 4.95                        | 690                                | 5.60                      | 1138                         | $S_0 \rightarrow S_1$    | S1         | 3.050                        | 0.179                         |
|          |    |                             |                                    |                           |                              | $S_0 \rightarrow S_7$    | S7         | 4.028                        | 1.285                         |
|          |    |                             |                                    |                           |                              | $S_0 \rightarrow S_{12}$ | S12        | 4.260                        | 1.292                         |
|          |    |                             |                                    |                           |                              | $S_0 \rightarrow S_{16}$ | S16        | 4.488                        | 1.459                         |
|          |    |                             |                                    |                           |                              | $S_0 \rightarrow S_{19}$ | <i>S19</i> | <i>4.662</i>                 | <i>2.066</i>                  |

|          |     |             |            |             |            |                 |            |              |              |
|----------|-----|-------------|------------|-------------|------------|-----------------|------------|--------------|--------------|
| <b>C</b> | T8  | 2.07        | 297        | 1.88        | 460        | S0 → S1         | S1         | 3.132        | 0.219        |
|          |     |             |            |             |            | S0 → S7         | S7         | 4.073        | 2.073        |
|          |     |             |            |             |            | S0 → S17        | S17        | 4.530        | 1.229        |
|          |     |             |            |             |            | <i>S0 → S19</i> | <i>S19</i> | <i>4.700</i> | <i>2.121</i> |
| <b>d</b> | T9  | 3.08        | 480        | 2.83        | 751        | S0 → S1         | S1         | 3.107        | 0.217        |
|          |     |             |            |             |            | S0 → S8         | S8         | 4.077        | 1.229        |
|          |     |             |            |             |            | S0 → S12        | S12        | 4.304        | 1.297        |
|          |     |             |            |             |            | S0 → S16        | S16        | 4.477        | 1.318        |
|          |     |             |            |             |            | <i>S0 → S22</i> | <i>S22</i> | <i>4.812</i> | <i>1.748</i> |
| <b>e</b> | T10 | 2.83        | 751        | 1.45        | 836        | S0 → S1         | S1         | 3.086        | 0.261        |
|          |     |             |            |             |            | S0 → S6         | S6         | 3.414        | 0.716        |
|          |     |             |            |             |            | S0 → S13        | S13        | 4.305        | 1.389        |
|          |     |             |            |             |            | <i>S0 → S22</i> | <i>S22</i> | <i>4.793</i> | <i>2.605</i> |
| <b>a</b> | T11 | 6.01        | 740        | 6.01        | 1304       | S0 → S1         | S1         | 3.075        | 0.187        |
|          |     |             |            |             |            | S0 → S8         | S8         | 4.031        | 1.378        |
|          |     |             |            |             |            | S0 → S13        | S13        | 4.237        | 1.165        |
|          |     |             |            |             |            | <i>S0 → S20</i> | <i>S20</i> | <i>4.652</i> | <i>2.839</i> |
| <b>b</b> | T12 | 5.55        | 2286       | 5.61        | 12563      | S0 → S1         | S1         | 2.230        | 0.142        |
|          |     |             |            |             |            | S0 → S14        | S14        | 4.000        | 1.365        |
|          |     |             |            |             |            | S0 → S20        | S20        | 4.200        | 1.410        |
|          |     |             |            |             |            | <i>S0 → S31</i> | <i>S31</i> | <i>4.578</i> | <i>1.874</i> |
| <b>c</b> | T13 | <b>2.58</b> | <b>449</b> | <b>2.27</b> | <b>746</b> | S0 → S1         | S1         | 3.087        | 0.180        |
|          |     |             |            |             |            | S0 → S9         | S9         | 4.043        | 1.200        |
|          |     |             |            |             |            | S0 → S17        | S17        | 4.309        | 1.354        |
|          |     |             |            |             |            | <i>S0 → S21</i> | <i>S21</i> | <i>4.669</i> | <i>2.583</i> |
| <b>d</b> | T14 | 2.30        | 515        | 2.04        | 1113       | S0 → S1         | S1         | 3.096        | 0.429        |
|          |     |             |            |             |            | S0 → S6         | S6         | 3.313        | 0.859        |
|          |     |             |            |             |            | S0 → S9         | S9         | 3.789        | 1.013        |
|          |     |             |            |             |            | S0 → S10        | S10        | 4.092        | 1.429        |
|          |     |             |            |             |            | <i>S0 → S25</i> | <i>S25</i> | <i>4.668</i> | <i>2.384</i> |
| <b>e</b> | T15 | 2.05        | 653        | 2.12        | 1461       | S0 → S1         | S1         | 3.098        | 0.438        |
|          |     |             |            |             |            | S0 → S8         | S8         | 3.527        | 0.685        |
|          |     |             |            |             |            | S0 → S11        | S11        | 4.132        | 1.395        |
|          |     |             |            |             |            | S0 → S28        | S28        | 4.649        | 2.107        |
|          |     |             |            |             |            | <i>S0 → S45</i> | <i>S45</i> | <i>5.134</i> | <i>1.205</i> |
| <b>a</b> | T16 | 4.30        | 695        | 4.25        | 1008       | S0 → S1         | S1         | 3.081        | 0.190        |

|          |     |             |            |             |            |                      |     |       |       |
|----------|-----|-------------|------------|-------------|------------|----------------------|-----|-------|-------|
|          |     |             |            |             |            | $S0 \rightarrow S7$  | S7  | 4.019 | 1.496 |
|          |     |             |            |             |            | $S0 \rightarrow S11$ | S11 | 4.246 | 1.311 |
|          |     |             |            |             |            | $S0 \rightarrow S18$ | S18 | 4.644 | 3.060 |
| <b>b</b> | T17 | 3.74        | 566        | 4.40        | 996        | $S0 \rightarrow S1$  | S1  | 3.065 | 0.183 |
|          |     |             |            |             |            | $S0 \rightarrow S7$  | S7  | 4.032 | 1.324 |
|          |     |             |            |             |            | $S0 \rightarrow S11$ | S11 | 4.230 | 1.049 |
|          |     |             |            |             |            | $S0 \rightarrow S19$ | S19 | 4.651 | 2.876 |
|          |     |             |            |             |            | $S0 \rightarrow S33$ | S33 | 5.168 | 1.031 |
| <b>c</b> | T18 | 3.34        | 352        | 2.83        | 507        | $S0 \rightarrow S1$  | S1  | 3.119 | 0.203 |
|          |     |             |            |             |            | $S0 \rightarrow S7$  | S7  | 4.017 | 1.731 |
|          |     |             |            |             |            | $S0 \rightarrow S11$ | S11 | 4.274 | 1.441 |
|          |     |             |            |             |            | $S0 \rightarrow S19$ | S19 | 4.641 | 3.024 |
| <b>d</b> | T19 | 2.44        | 225        | 1.97        | 403        | $S0 \rightarrow S1$  | S1  | 3.115 | 0.196 |
|          |     |             |            |             |            | $S0 \rightarrow S8$  | S8  | 4.090 | 1.311 |
|          |     |             |            |             |            | $S0 \rightarrow S12$ | S12 | 4.285 | 1.358 |
|          |     |             |            |             |            | $S0 \rightarrow S20$ | S20 | 4.651 | 2.610 |
| <b>e</b> | T20 | <b>1.62</b> | <b>357</b> | <b>1.51</b> | <b>650</b> | $S0 \rightarrow S1$  | S1  | 3.125 | 0.226 |
|          |     |             |            |             |            | $S0 \rightarrow S7$  | S7  | 4.073 | 1.967 |
|          |     |             |            |             |            | $S0 \rightarrow S13$ | S13 | 4.316 | 1.527 |
|          |     |             |            |             |            | $S0 \rightarrow S21$ | S21 | 4.666 | 2.849 |
| <b>a</b> | T21 | 3.58        | 1224       | 4.25        | 4107       | $S0 \rightarrow S1$  | S1  | 2.854 | 1.089 |
|          |     |             |            |             |            | $S0 \rightarrow S9$  | S9  | 4.034 | 1.211 |
|          |     |             |            |             |            | $S0 \rightarrow S12$ | S12 | 4.091 | 1.115 |
|          |     |             |            |             |            | $S0 \rightarrow S21$ | S21 | 4.652 | 3.003 |
| <b>b</b> | T22 | 5.02        | 1532       | 1.03        | 13348      | $S0 \rightarrow S1$  | S1  | 2.238 | 0.783 |
|          |     |             |            |             |            | $S0 \rightarrow S11$ | S11 | 3.971 | 1.079 |
|          |     |             |            |             |            | $S0 \rightarrow S18$ | S18 | 4.233 | 1.283 |
|          |     |             |            |             |            | $S0 \rightarrow S23$ | S23 | 4.504 | 1.026 |
|          |     |             |            |             |            | $S0 \rightarrow S25$ | S25 | 4.657 | 2.819 |
| <b>c</b> | T23 | 2.84        | 1181       | 2.16        | 4049       | $S0 \rightarrow S1$  | S1  | 2.866 | 1.325 |
|          |     |             |            |             |            | $S0 \rightarrow S13$ | S13 | 4.083 | 1.765 |
|          |     |             |            |             |            | $S0 \rightarrow S19$ | S19 | 4.315 | 1.569 |
|          |     |             |            |             |            | $S0 \rightarrow S25$ | S25 | 4.666 | 3.156 |
| <b>d</b> | T24 | 1.89        | 1119       | 1.72        | 18404      | $S0 \rightarrow S1$  | S1  | 2.261 | 0.787 |
|          |     |             |            |             |            | $S0 \rightarrow S2$  | S2  | 2.869 | 1.104 |
|          |     |             |            |             |            | $S0 \rightarrow S13$ | S13 | 3.992 | 1.110 |

|          |     |      |     |      |       |                      |     |       |       |
|----------|-----|------|-----|------|-------|----------------------|-----|-------|-------|
|          |     |      |     |      |       | $S0 \rightarrow S15$ | S15 | 4.084 | 1.306 |
|          |     |      |     |      |       | $S0 \rightarrow S28$ | S28 | 4.668 | 3.199 |
| <b>e</b> | T25 | 1.88 | 999 | 9.03 | 39343 | $S0 \rightarrow S1$  | S1  | 2.365 | 0.783 |
|          |     |      |     |      |       | $S0 \rightarrow S2$  | S2  | 2.366 | 0.782 |
|          |     |      |     |      |       | $S0 \rightarrow S19$ | S19 | 4.148 | 1.821 |
|          |     |      |     |      |       | $S0 \rightarrow S29$ | S29 | 4.487 | 1.061 |
|          |     |      |     |      |       | $S0 \rightarrow S31$ | S31 | 4.662 | 2.629 |
| <b>a</b> | T26 | 2.43 | 263 | 2.14 | 407   | $S0 \rightarrow S1$  | S1  | 3.083 | 0.184 |
|          |     |      |     |      |       | $S0 \rightarrow S7$  | S7  | 4.029 | 1.835 |
|          |     |      |     |      |       | $S0 \rightarrow s12$ | S12 | 4.238 | 1.275 |
|          |     |      |     |      |       | $S0 \rightarrow S17$ | S17 | 4.623 | 2.770 |
| <b>b</b> | T27 | 3.65 | 644 | 3.49 | 1048  | $S0 \rightarrow S1$  | S1  | 3.019 | 0.167 |
|          |     |      |     |      |       | $S0 \rightarrow S7$  | S7  | 3.992 | 1.172 |
|          |     |      |     |      |       | $S0 \rightarrow S11$ | S11 | 4.173 | 1.095 |
|          |     |      |     |      |       | $S0 \rightarrow S17$ | S17 | 4.611 | 2.109 |
| <b>c</b> | T28 | 3.79 | 493 | 3.98 | 791   | $S0 \rightarrow S1$  | S1  | 3.050 | 0.176 |
|          |     |      |     |      |       | $S0 \rightarrow S7$  | S7  | 4.030 | 1.578 |
|          |     |      |     |      |       | $S0 \rightarrow S17$ | S17 | 4.605 | 2.404 |
| <b>d</b> | T29 | 3.44 | 452 | 3.41 | 806   | $S0 \rightarrow S1$  | S1  | 3.026 | 0.169 |
|          |     |      |     |      |       | $S0 \rightarrow S7$  | S7  | 4.001 | 1.242 |
|          |     |      |     |      |       | $S0 \rightarrow S8$  | S8  | 4.044 | 1.291 |
|          |     |      |     |      |       | $S0 \rightarrow S17$ | S17 | 4.611 | 2.529 |
| <b>e</b> | T30 | 2.83 | 462 | 2.82 | 803   | $S0 \rightarrow S1$  | S1  | 3.039 | 0.169 |
|          |     |      |     |      |       | $S0 \rightarrow S7$  | S7  | 4.016 | 1.217 |
|          |     |      |     |      |       | $S0 \rightarrow S8$  | S8  | 4.067 | 1.278 |
|          |     |      |     |      |       | $S0 \rightarrow S19$ | S19 | 4.680 | 2.199 |
| <b>a</b> | T31 | 3.75 | 304 | 303  | 432   | $S0 \rightarrow S1$  | S1  | 3.081 | 0.186 |
|          |     |      |     |      |       | $S0 \rightarrow S7$  | S7  | 4.023 | 1.799 |
|          |     |      |     |      |       | $S0 \rightarrow S18$ | S18 | 4.615 | 2.523 |
| <b>b</b> | T32 | 6.63 | 494 | 6.11 | 726   | $S0 \rightarrow S1$  | S1  | 3.027 | 0.168 |
|          |     |      |     |      |       | $S0 \rightarrow S7$  | S7  | 3.997 | 1.433 |
|          |     |      |     |      |       | $S0 \rightarrow S19$ | S19 | 4.662 | 2.570 |
| <b>c</b> | T33 | 3.11 | 230 | 3.03 | 319   | $S0 \rightarrow S1$  | S1  | 3.088 | 0.197 |
|          |     |      |     |      |       | $S0 \rightarrow S7$  | S7  | 4.021 | 2.064 |
|          |     |      |     |      |       | $S0 \rightarrow S19$ | S19 | 4.613 | 2.622 |

|          |     |      |     |      |     |                      |     |       |       |
|----------|-----|------|-----|------|-----|----------------------|-----|-------|-------|
| <b>d</b> | T34 | 4.49 | 305 | 5.98 | 425 | $S0 \rightarrow S1$  | S1  | 3.026 | 0.196 |
|          |     |      |     |      |     | $S0 \rightarrow S7$  | S7  | 3.981 | 1.498 |
|          |     |      |     |      |     | $S0 \rightarrow S19$ | S19 | 4.618 | 2.723 |
| <b>e</b> | T35 | 1.66 | 256 | 1.66 | 259 | $S0 \rightarrow S1$  | S1  | 3.054 | 0.183 |
|          |     |      |     |      |     | $S0 \rightarrow S7$  | S7  | 3.988 | 1.795 |
|          |     |      |     |      |     | $S0 \rightarrow S19$ | S19 | 4.619 | 2.166 |

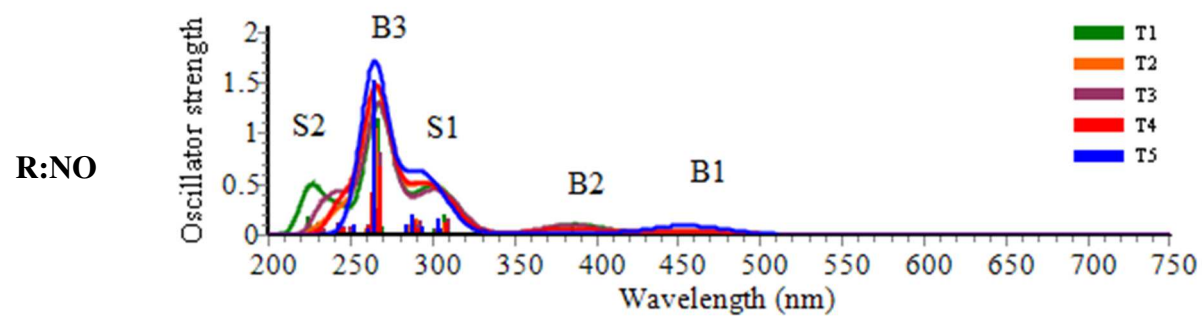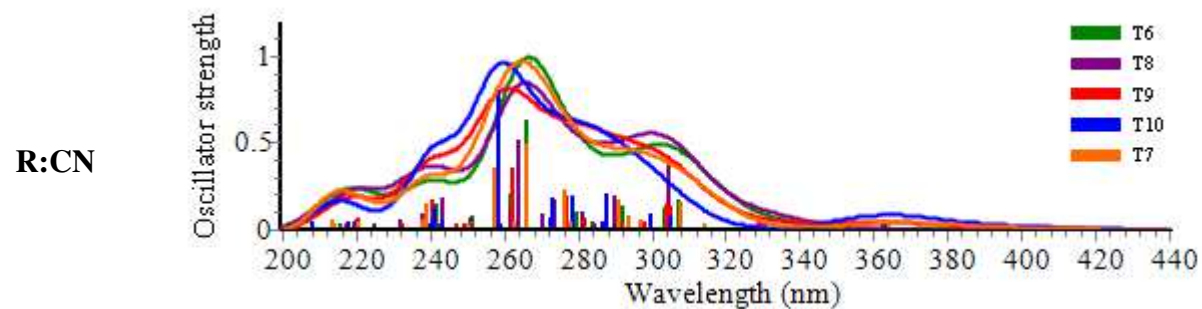

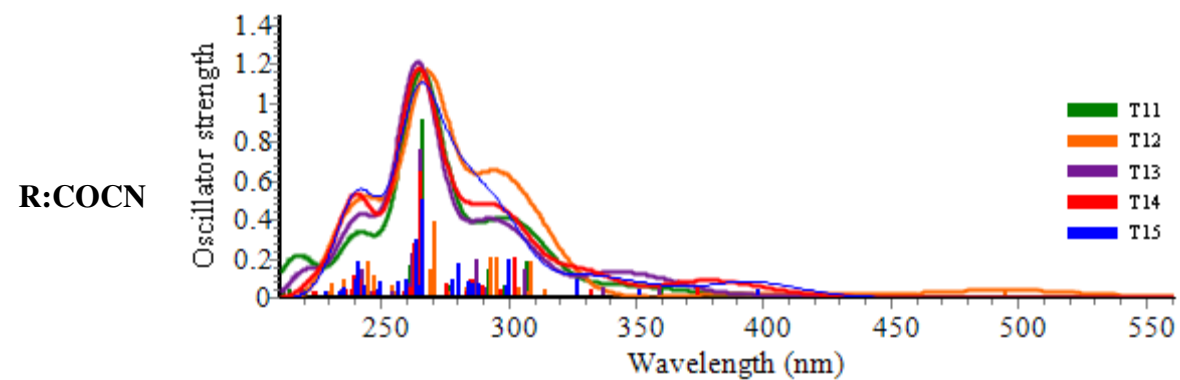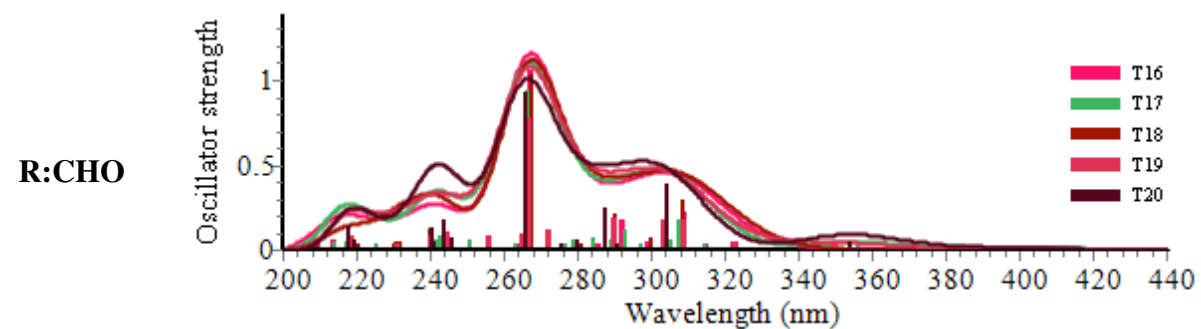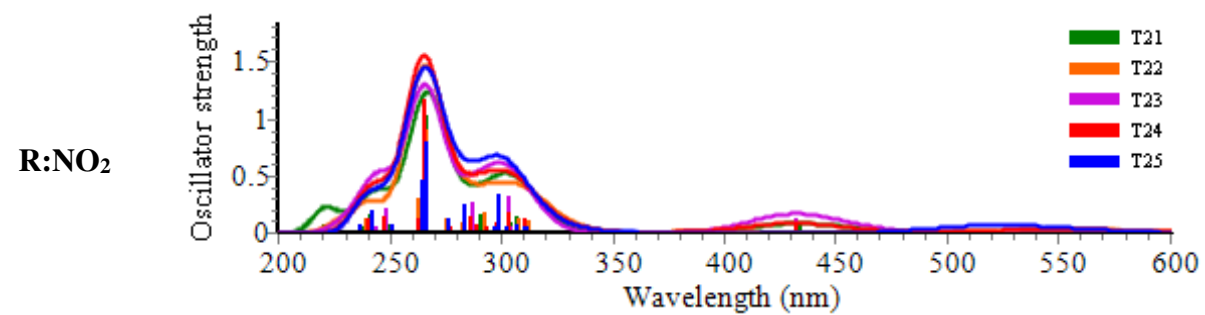

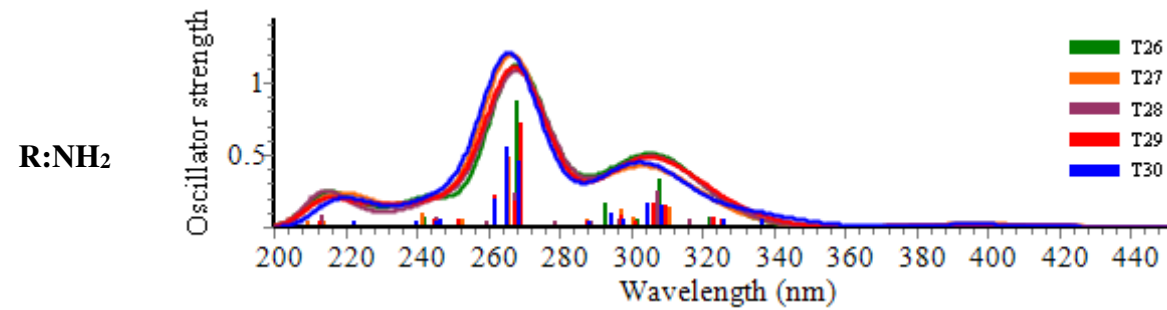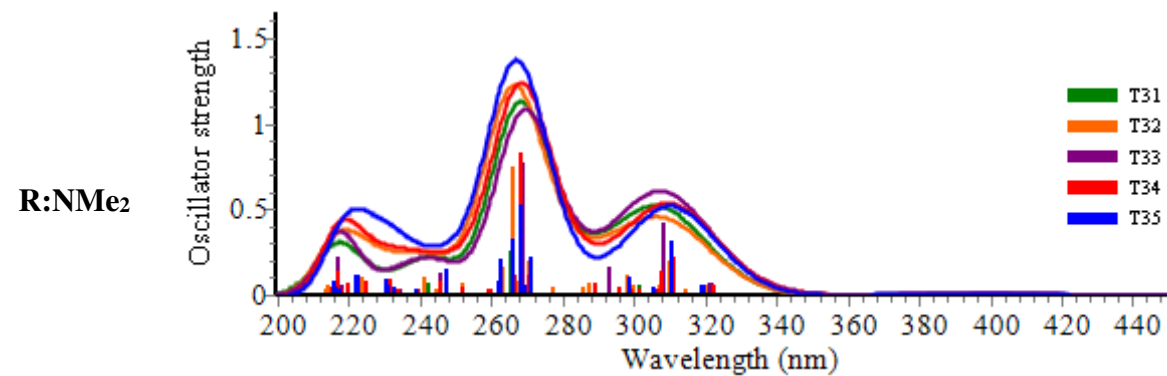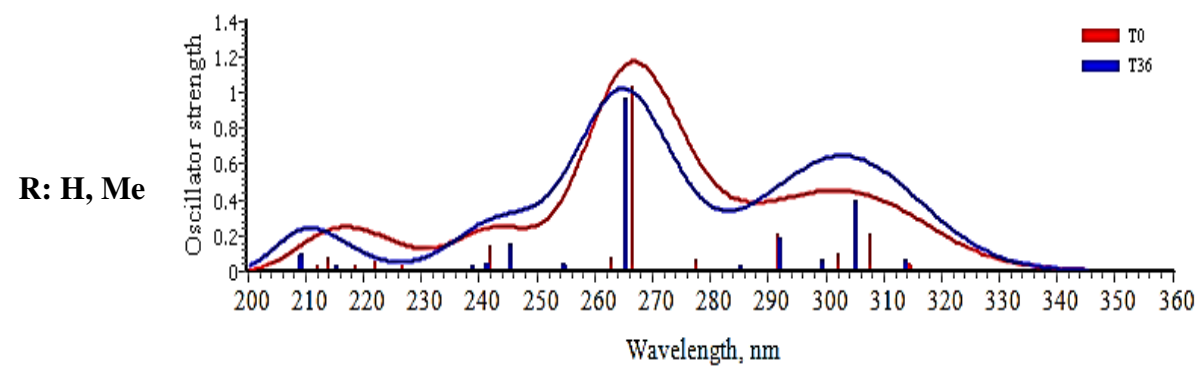



**Figure S1.** Calculated UV – vis absorption spectra of 36 bis-TTF-Ge compounds

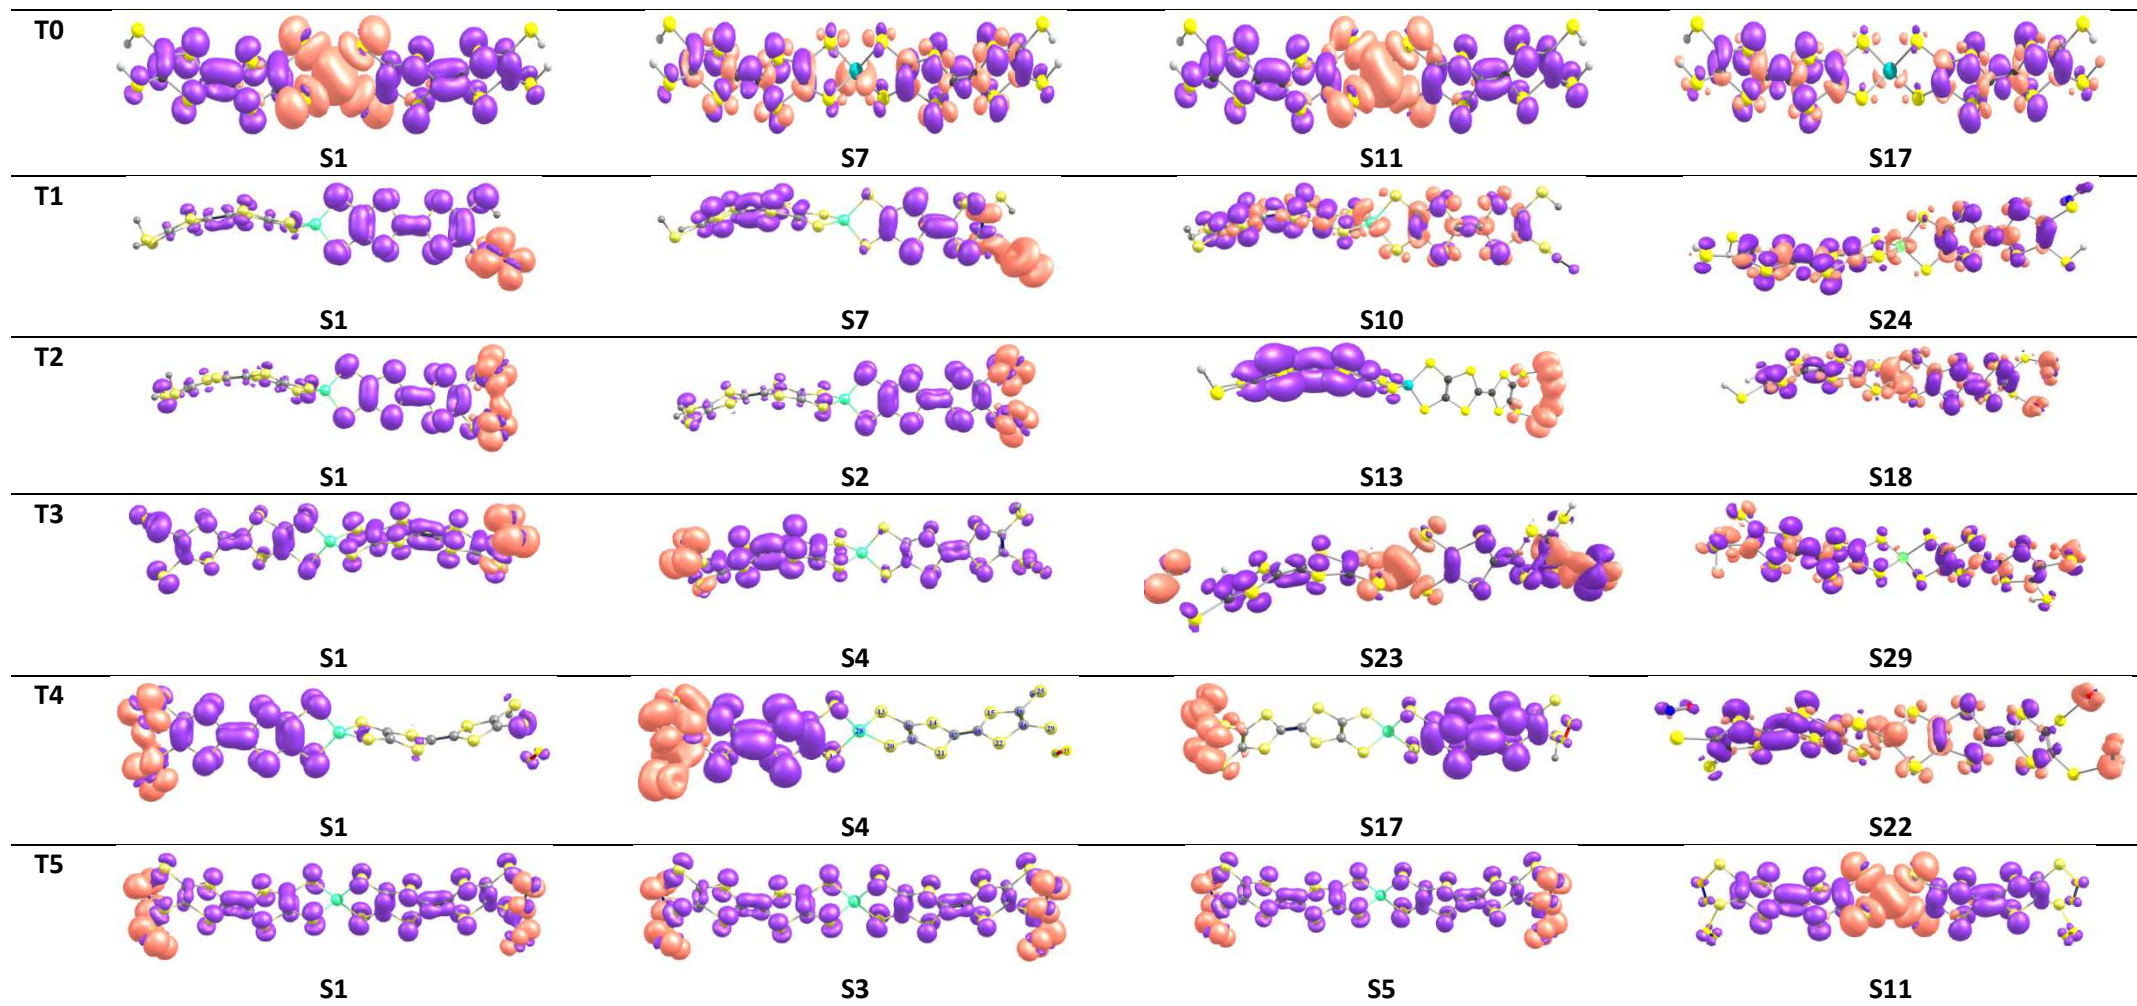

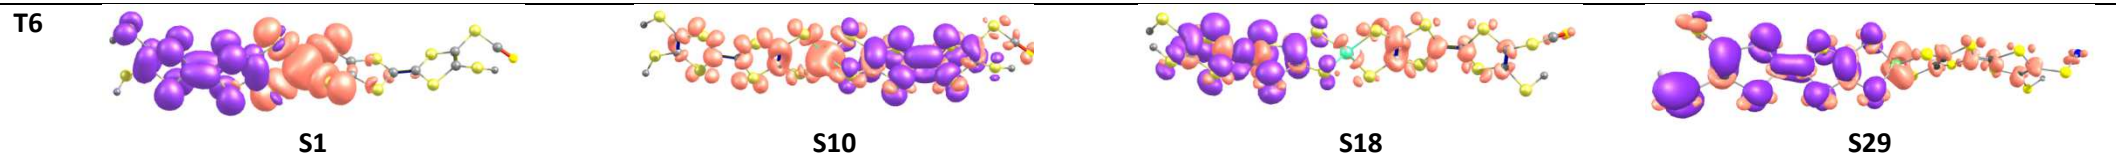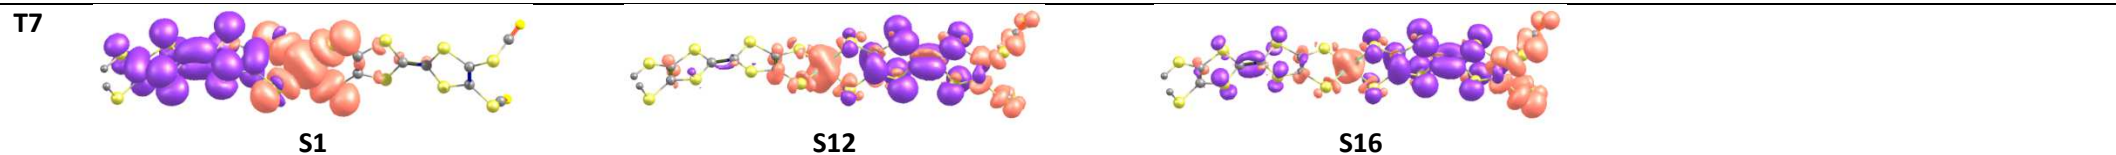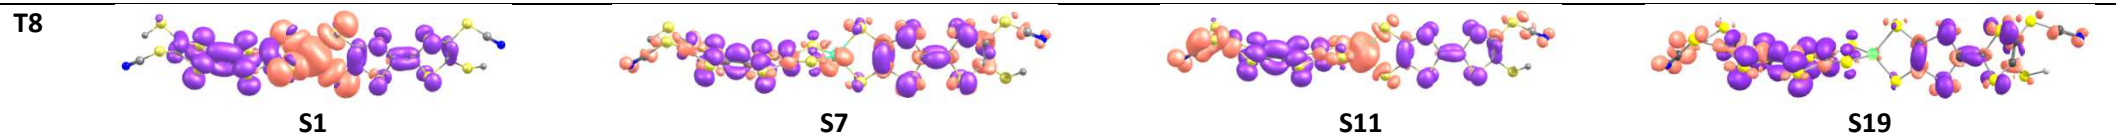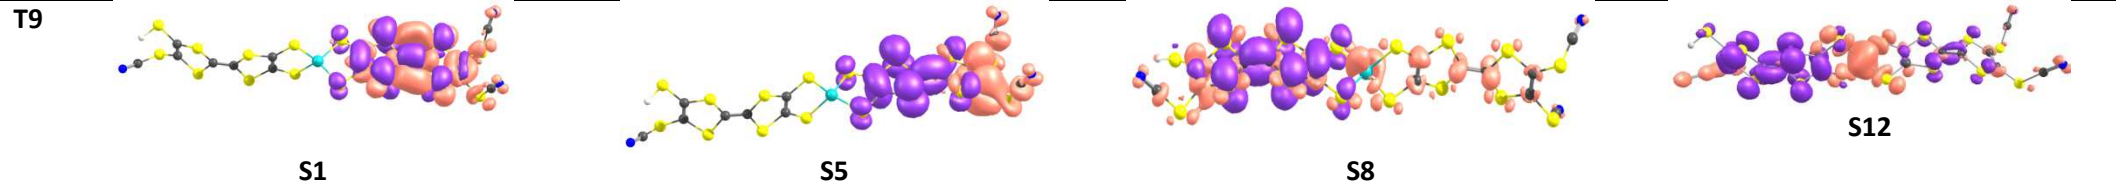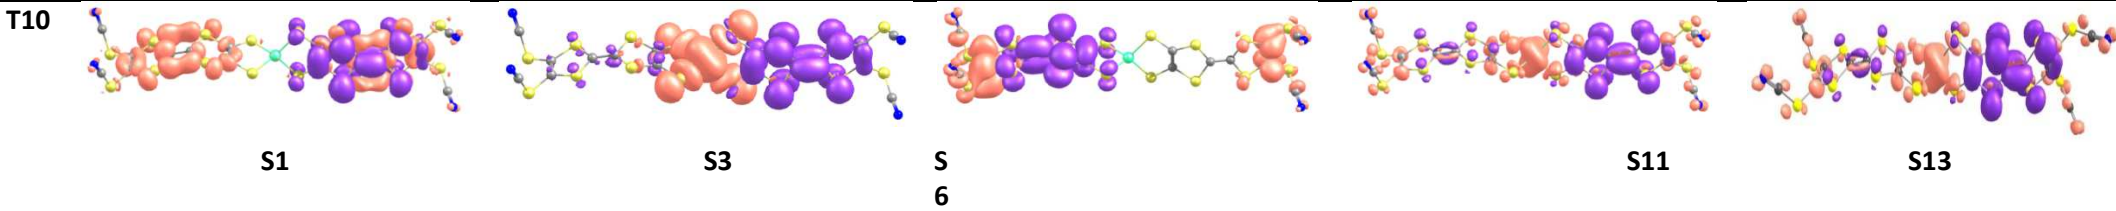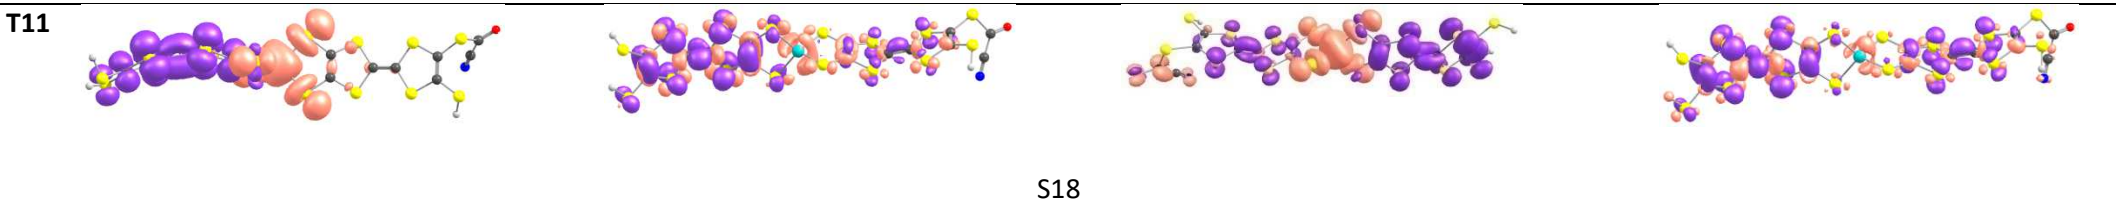

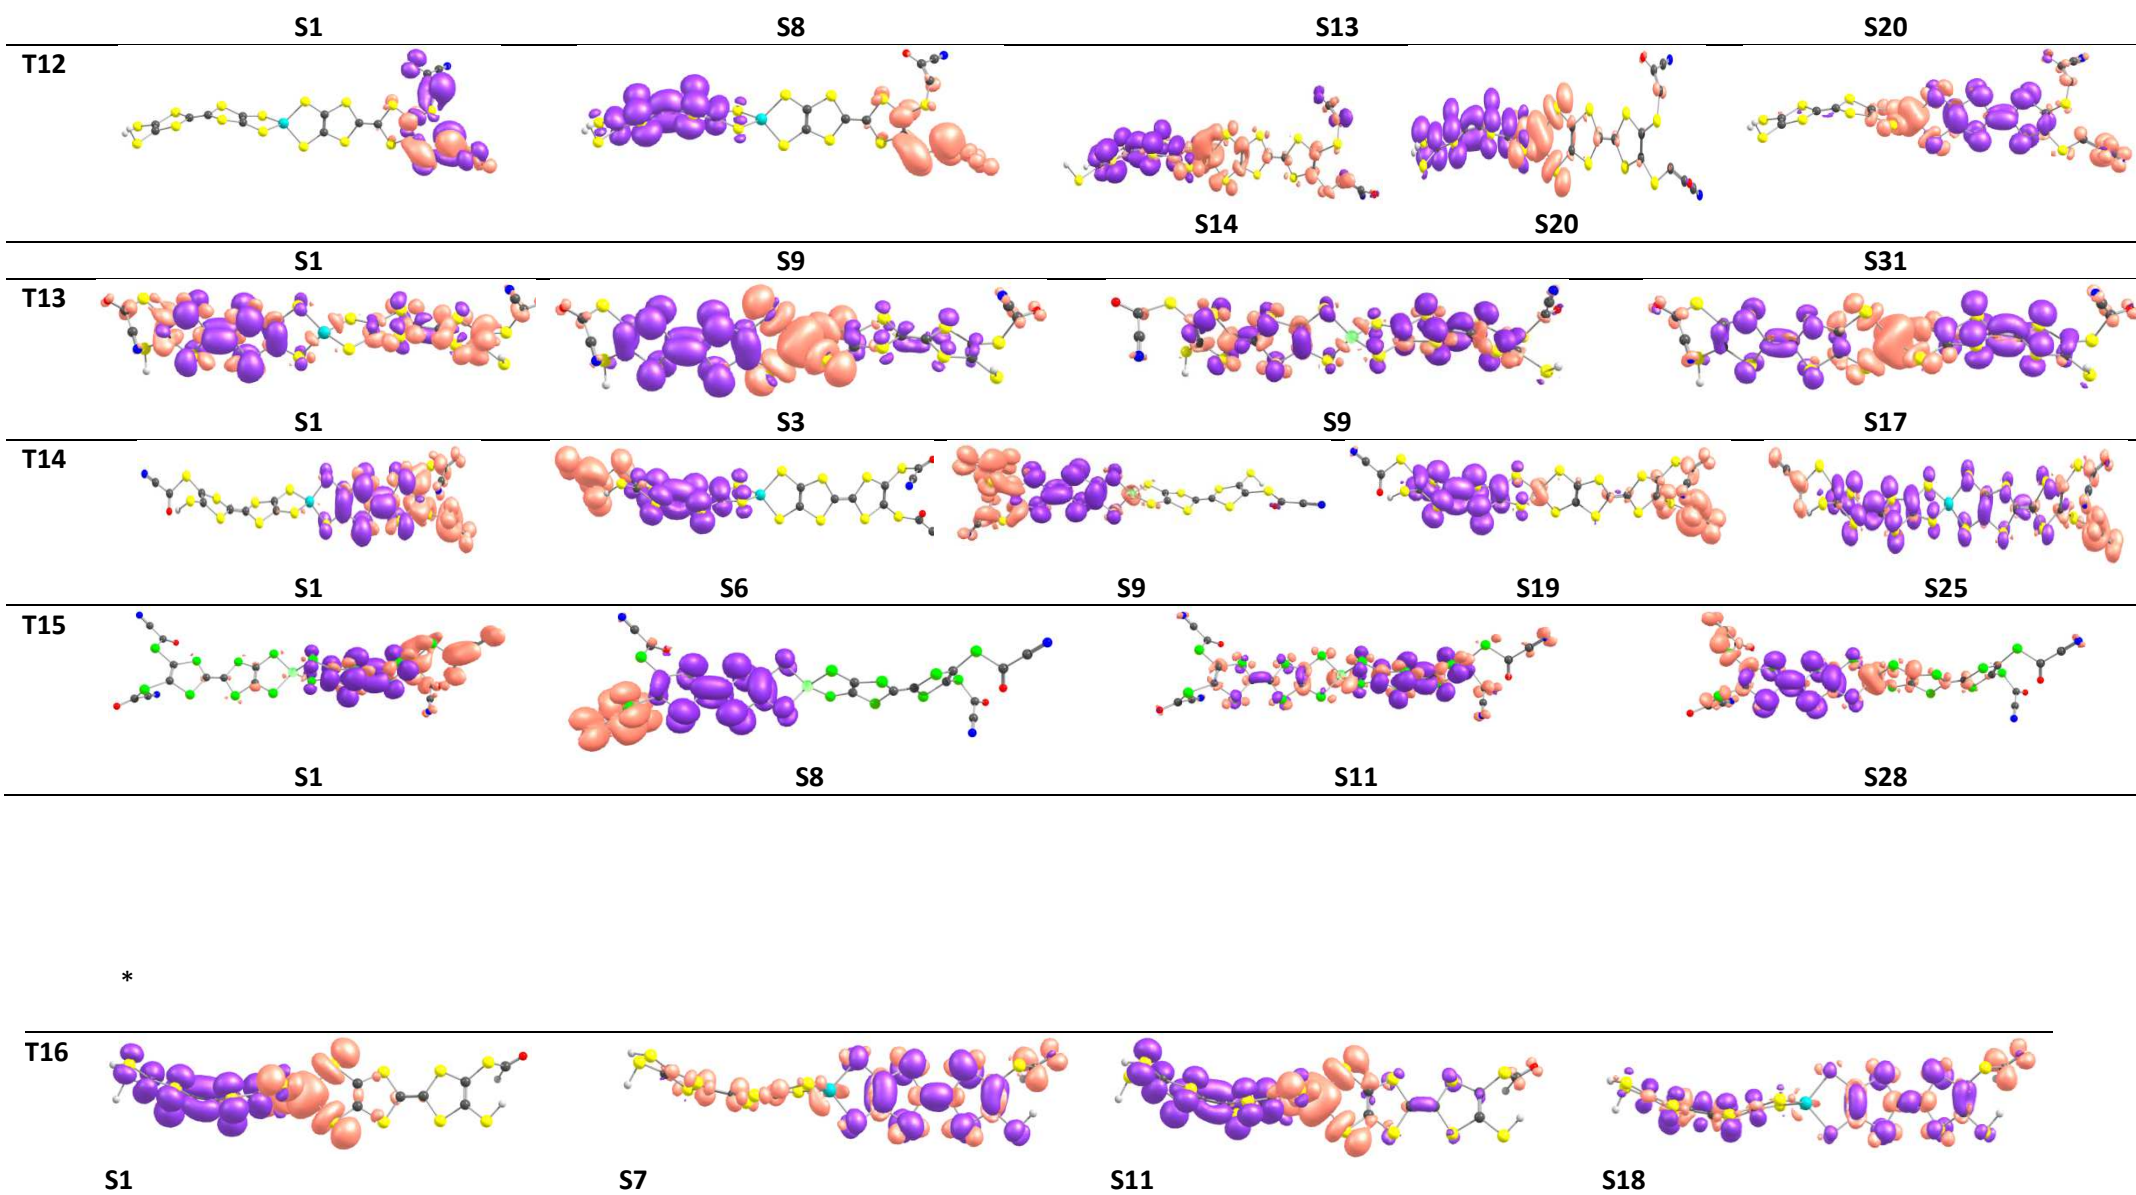

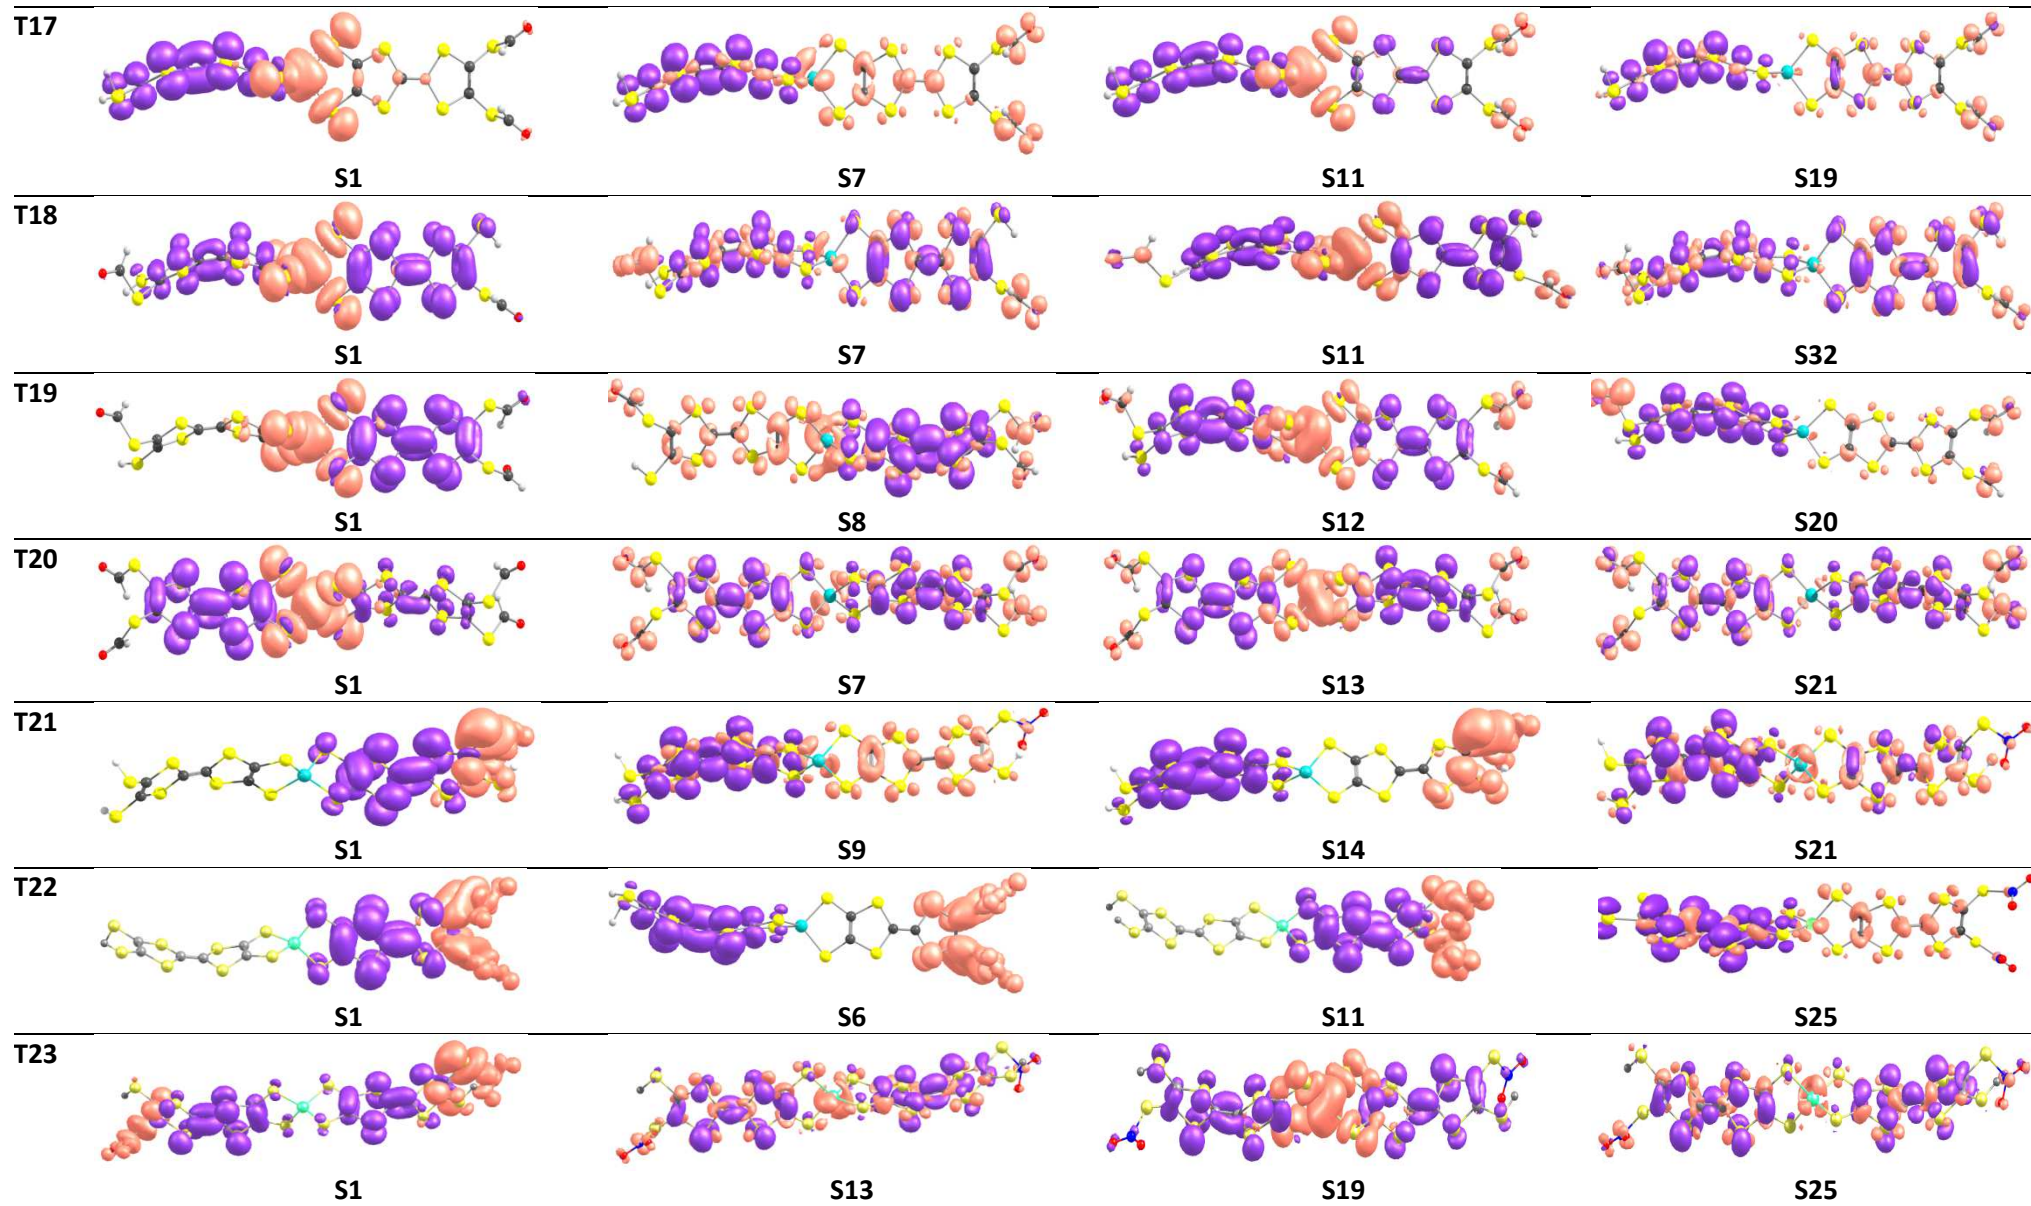

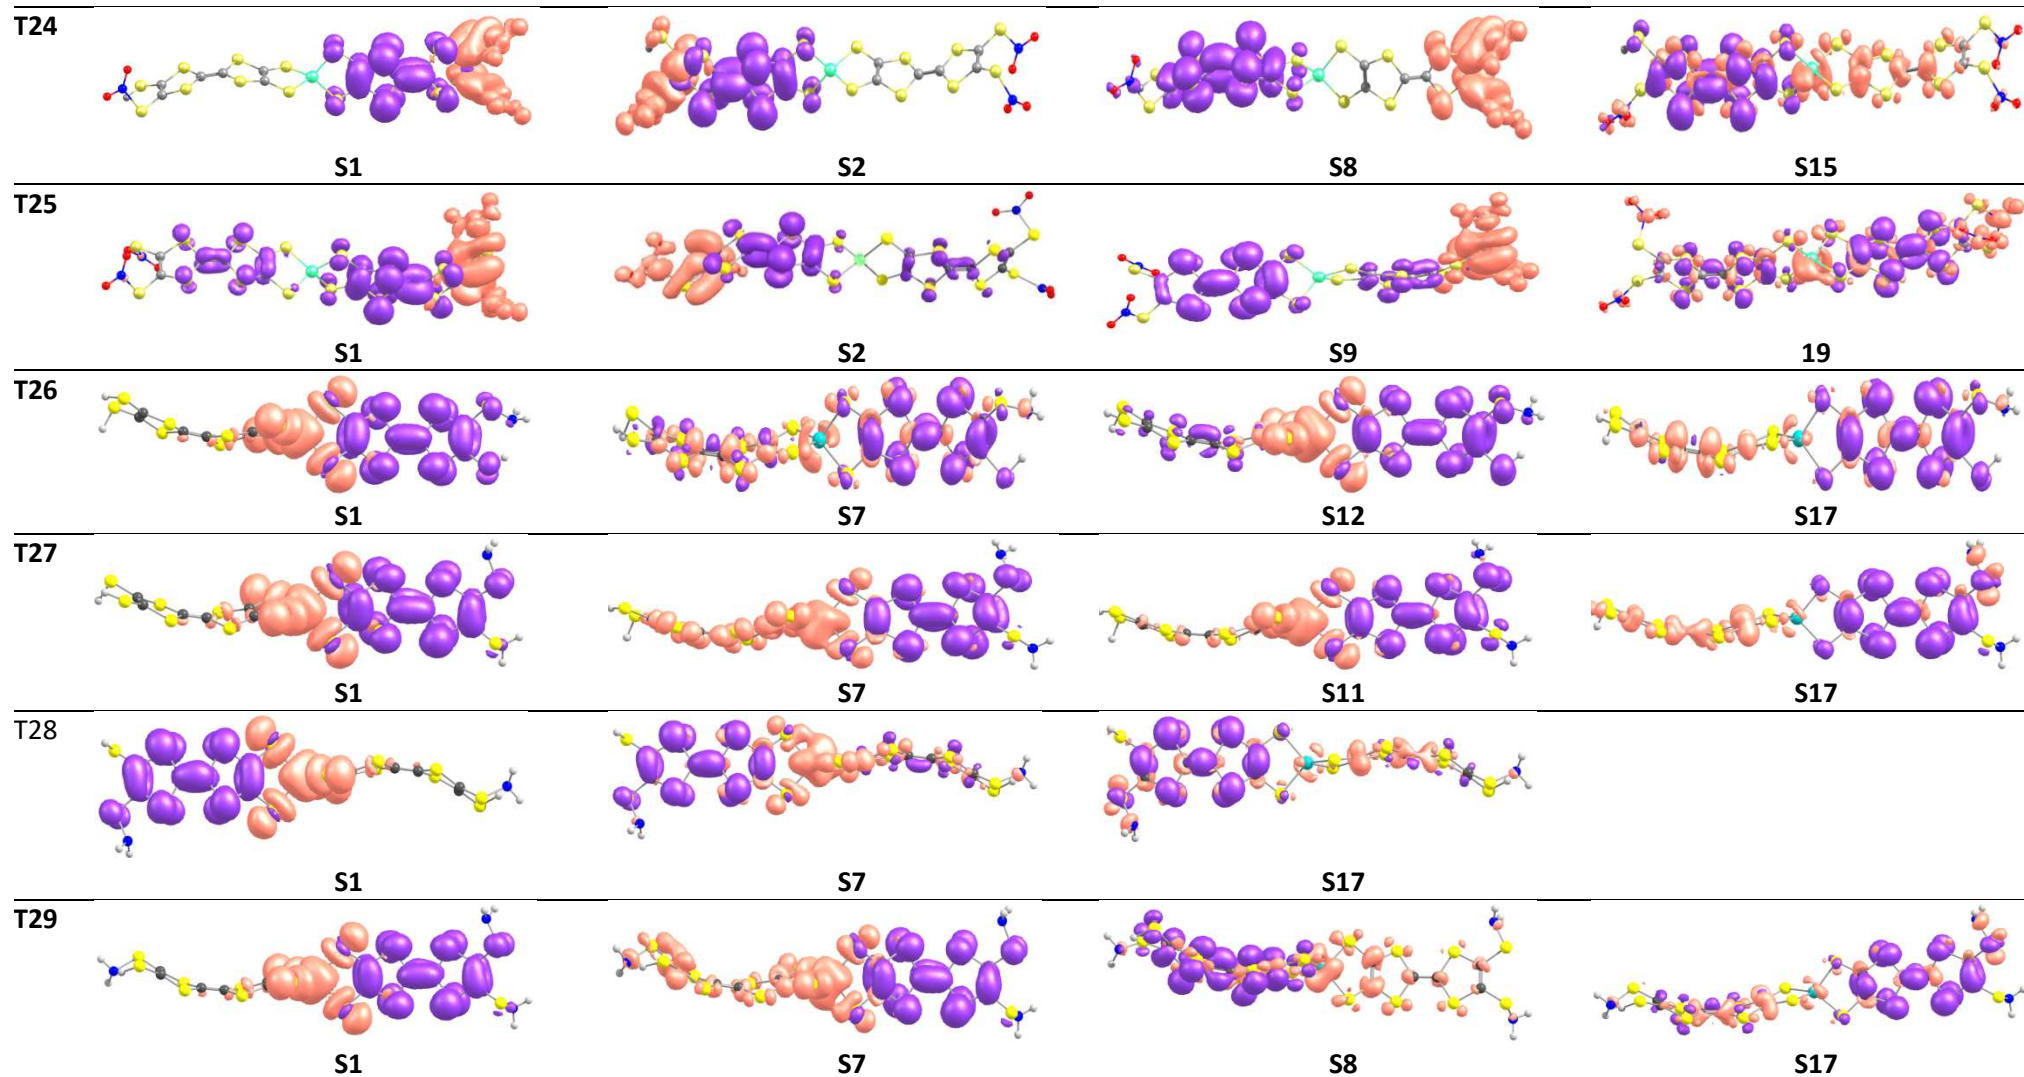

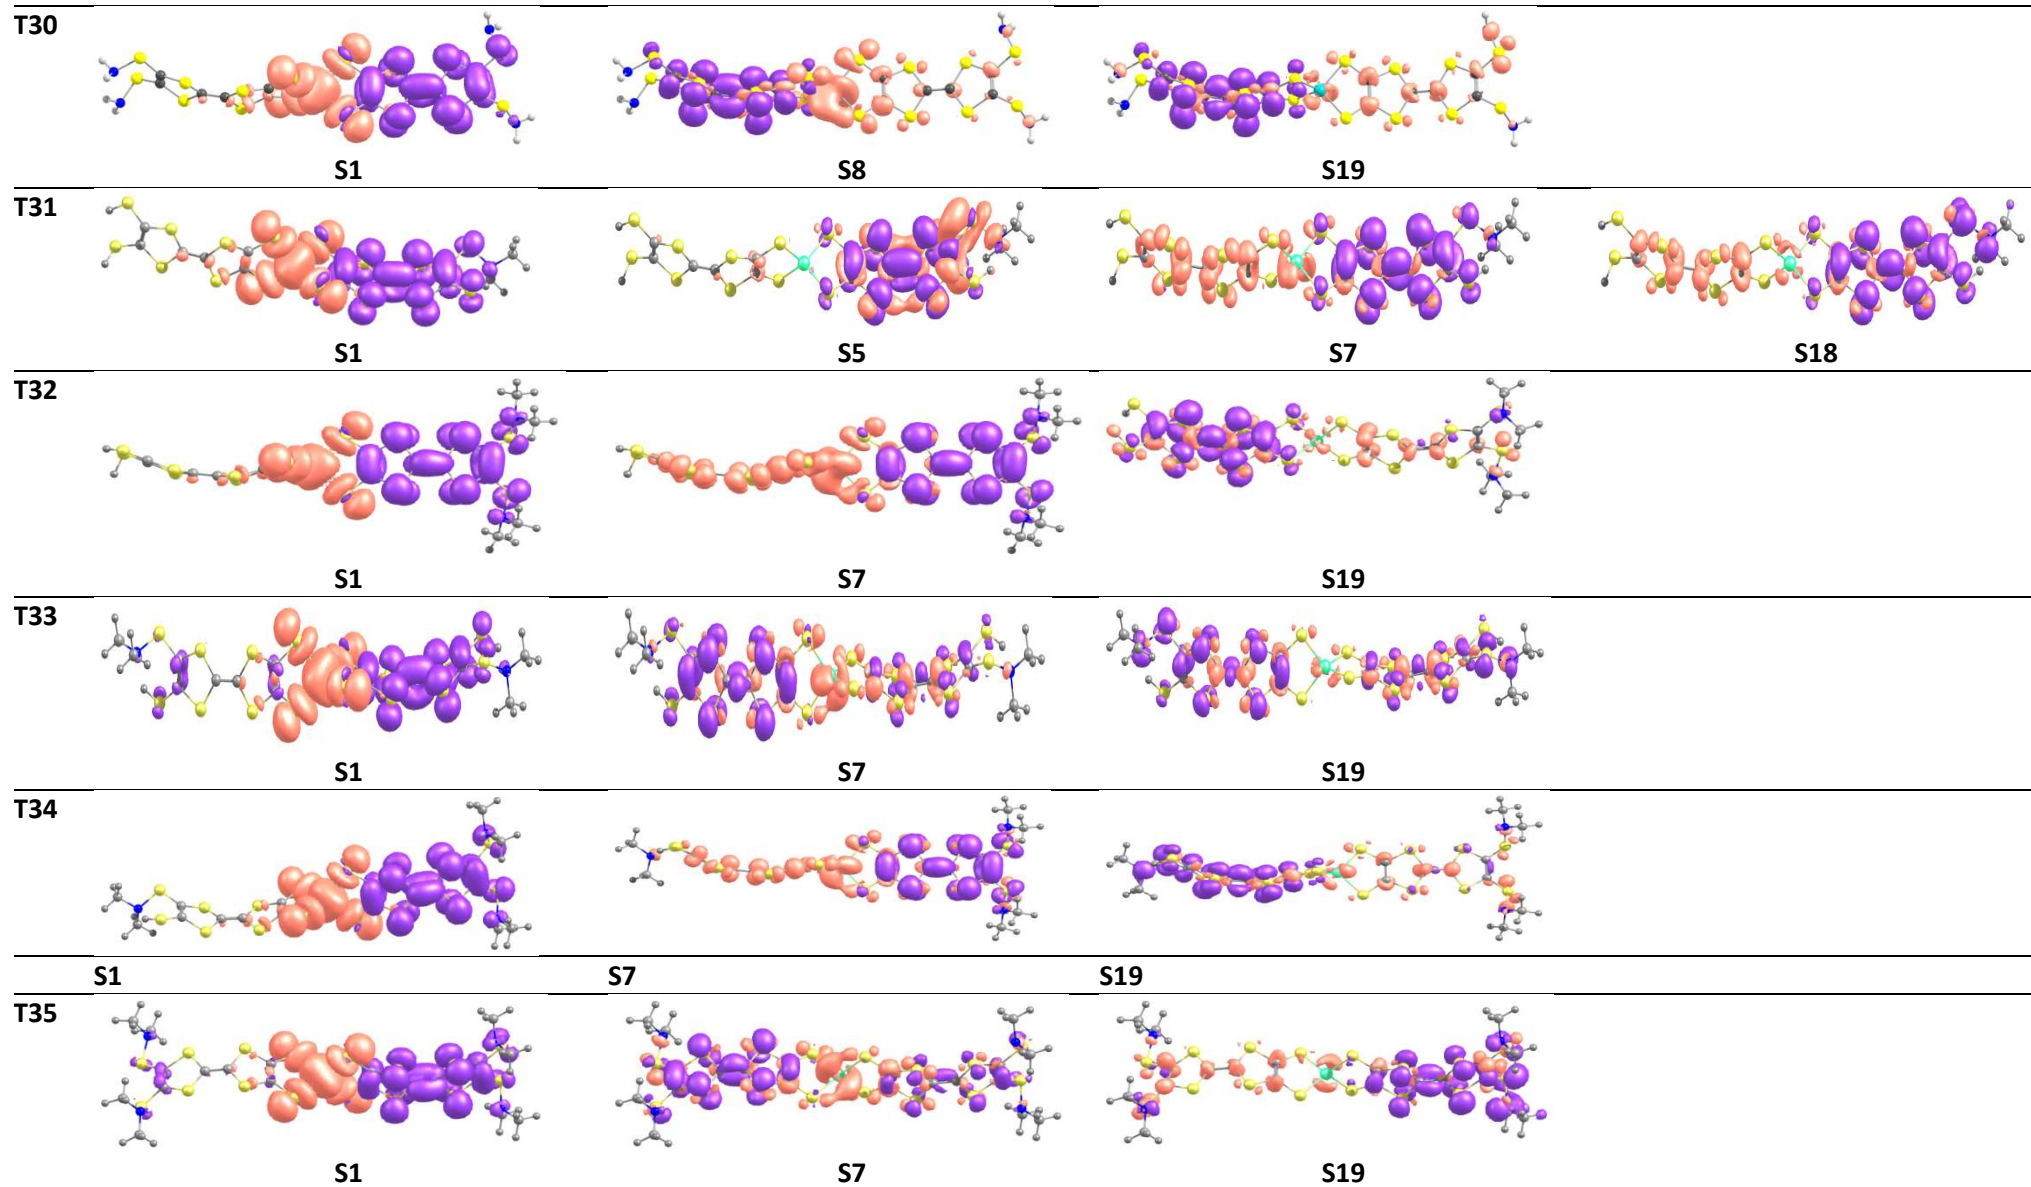

T36

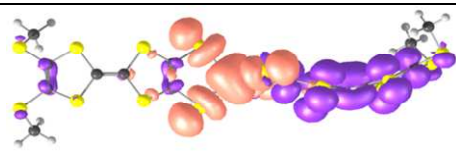

S1

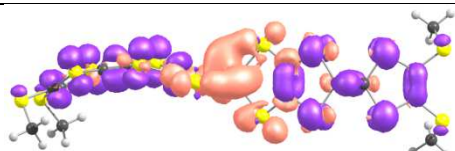

S7

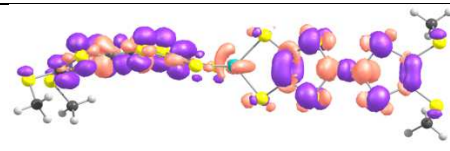

S17

 increased electron density

 Decreased electron density

**Figure S2.** Electron density difference of bis-TTF-Ge derivatives from the ground state to the crucial excited state ( $S_n$ :  $S_0 \rightarrow S_n$ ) plotted using 0.008 au isovalues

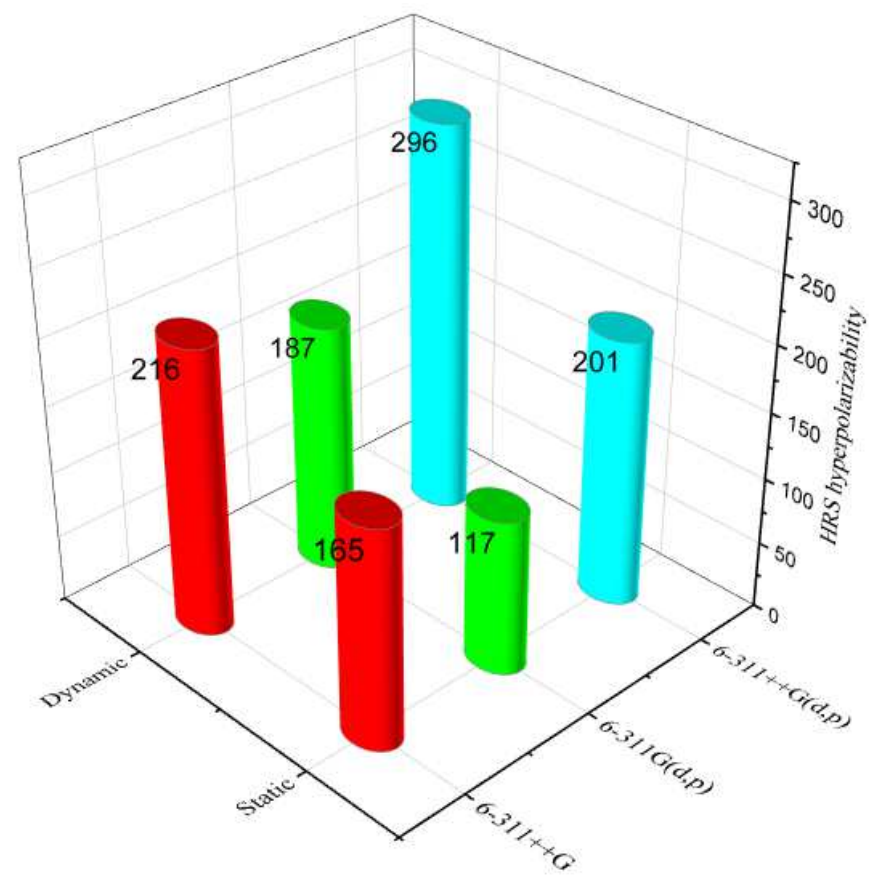

**Figure S3.** The calculated  $\beta_{\text{HRS}}$  values ( a.u) using the CAM-B3LYP functional at the different basis sets level for T36



### **Influence of the basis set on the NLO of T36**

Figure S3 reports the calculated  $\beta_{\text{HRS}}$  values in the static and dynamic regime using the CAM-B3LYP functional with different basis sets namely, 6-311++G, 6-311G(d,p) and 6-311++G(d,p) for the compounds T36. We can be seen that the 6-311++G(d,p) presented a larger value of hyperpolarizabilities than the 6-311++G and 6-311G(d,p), respectively. On the other hand, the difference between diffuse functional and 6-311G(d,p) is small. This is not to surprise because of the quasi linear shape of the molecule. The dynamic/static ratio of  $\beta_{\text{HRS}}$  is similar for all basis sets. Then, for the NLO calculation, the 6-311G(d,p) is a good choice for the title compounds.

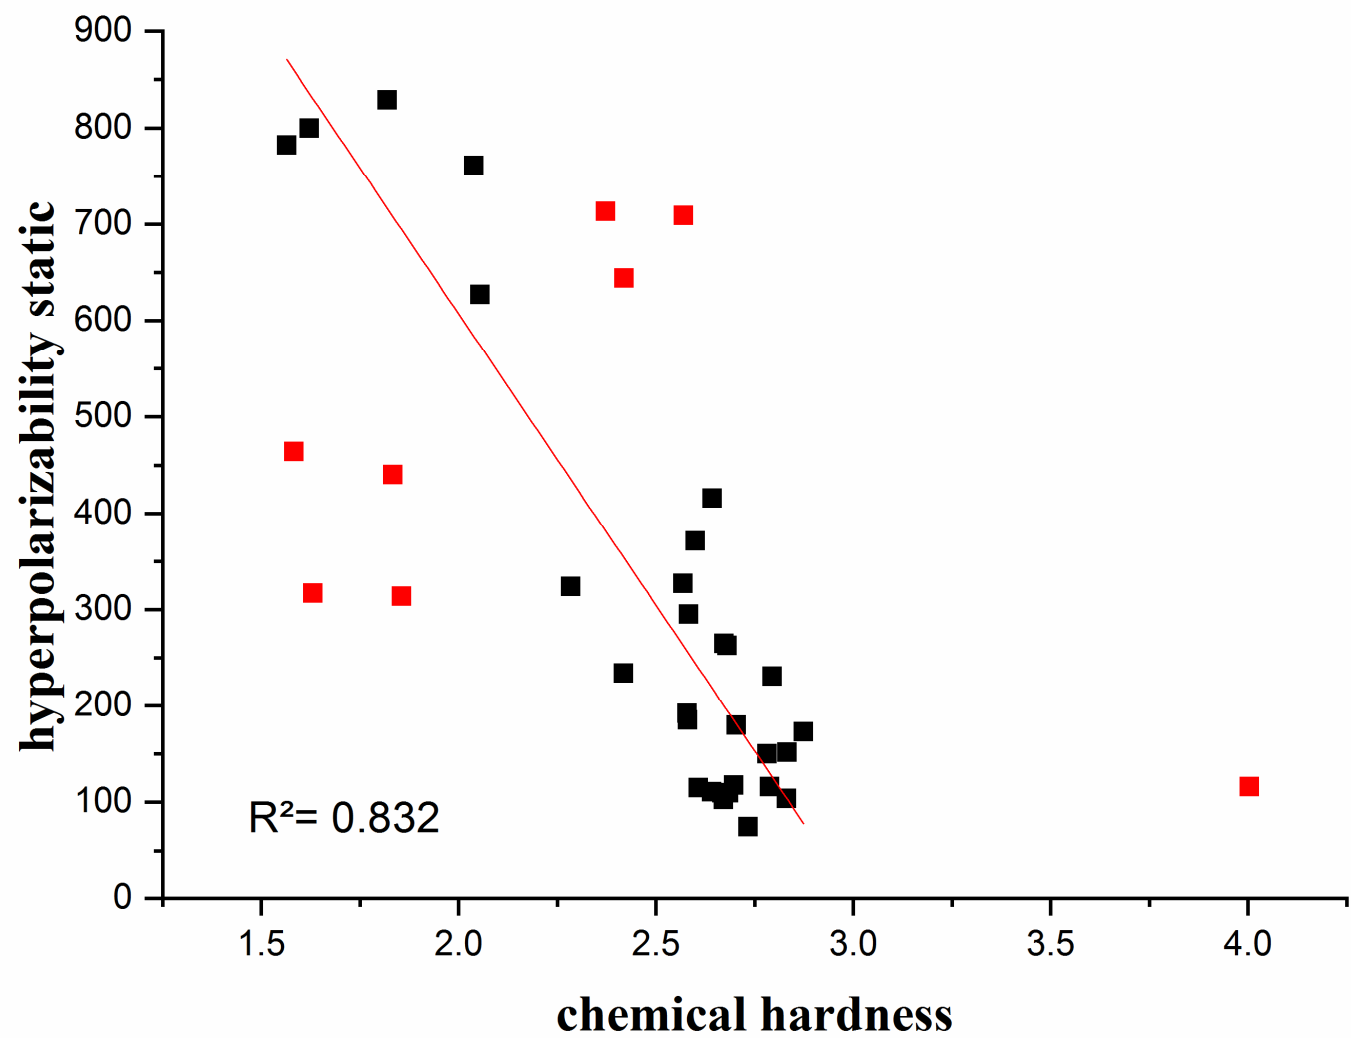

**Figure S4.** Correlation between static hyperpolarizability and hardness, T2,T4, T6, T7, T11, T13, T15 and T36 excepted

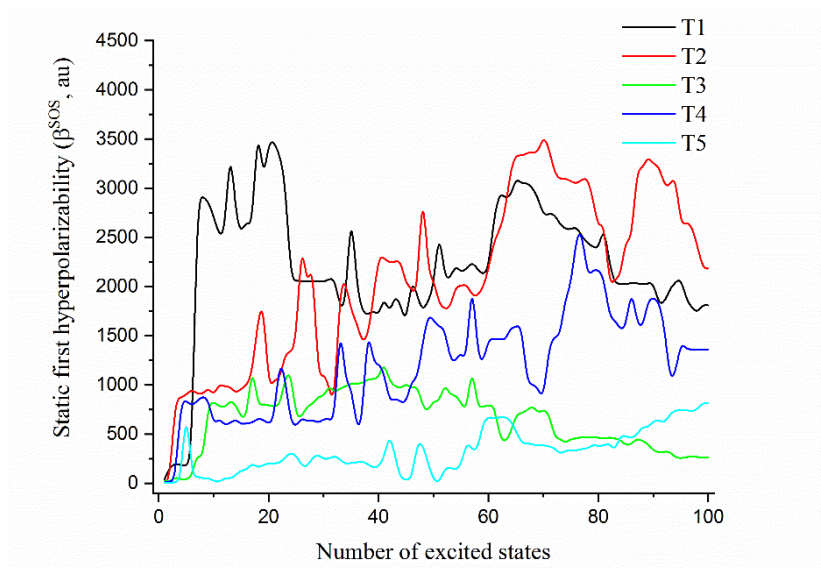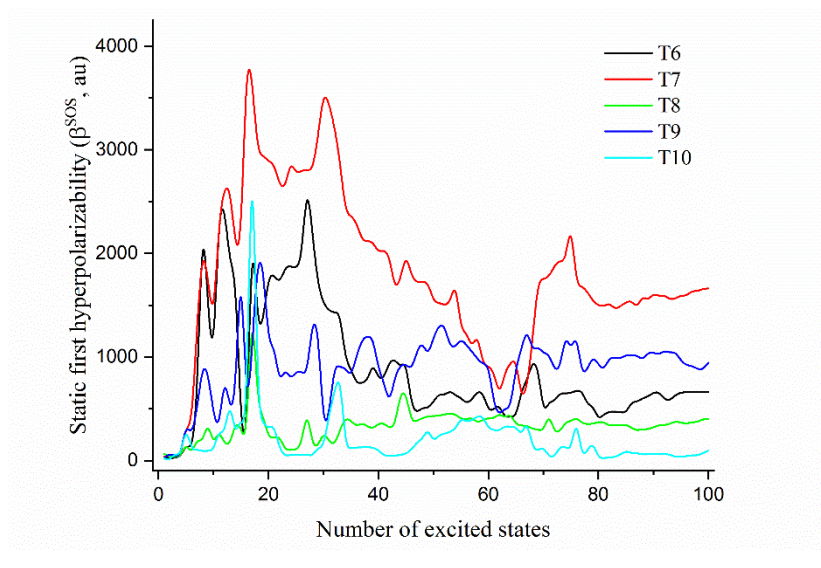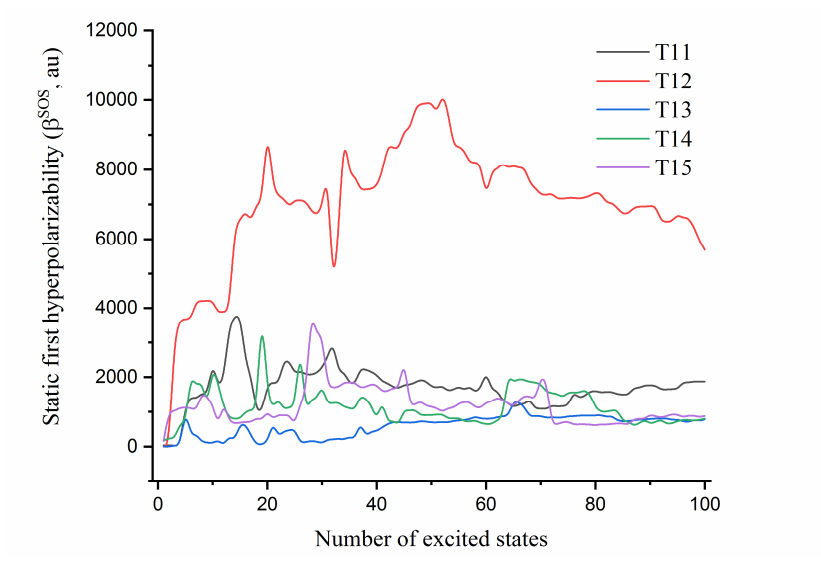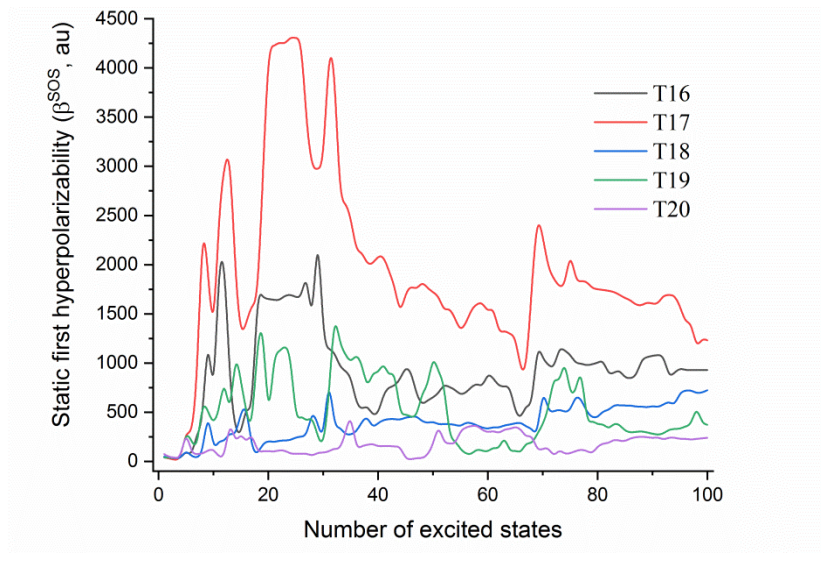

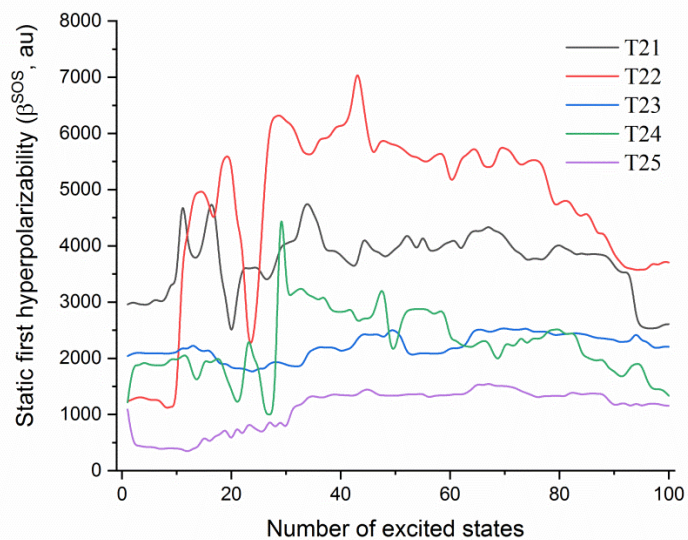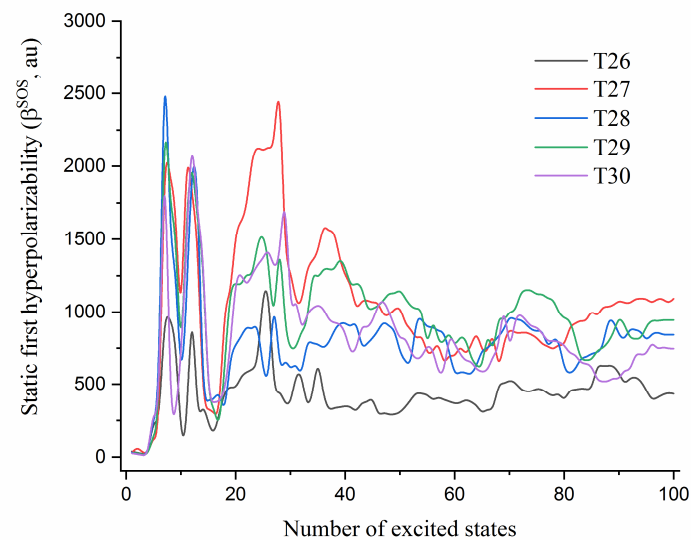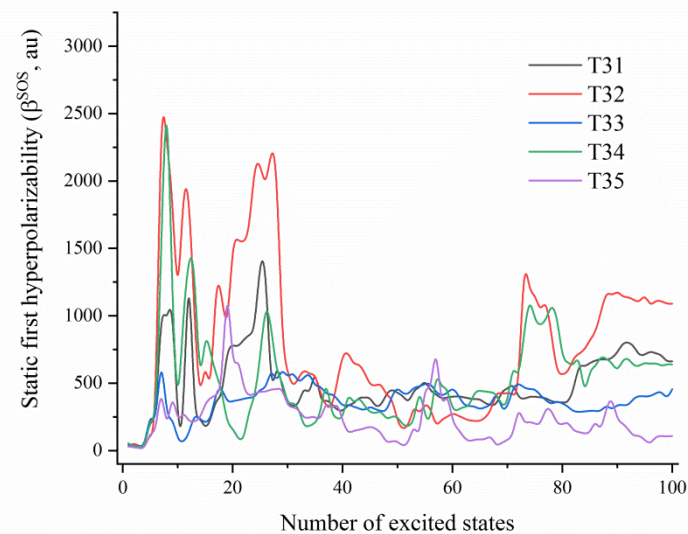

**Figure S5.** Relationship between the static first hyperpolarizability ( $\beta^{SOS}$ , a.u.) and the number of excited states

## Reference

Full citation for Gaussian 09 program

Ref 40. Gaussian 09, Revision B.01, Frisch, M. J.; Trucks, G. W.; Schlegel, H. B.; Scuseria, G. E.; Robb, M. A.; Cheeseman, J. R.; Scalmani, G.; Barone, V.; Mennucci, B.; Petersson, G. A.; Nakatsuji, H.; Caricato, M.; Li, X.; Hratchian, H. P.; Izmaylov, A. F.; Bloino, J.; Zheng, G.; Sonnenberg, J. L.; Hada, M.; Ehara, M.; Toyota, K.; Fukuda, R.; Hasegawa, J.; Ishida, M.; Nakajima, T.; Honda, Y.; Kitao, O.; Nakai, H.; Vreven, T.; Montgomery, J. A., Jr.; Peralta, J. E.; Ogliaro, F.; Bearpark, M.; Heyd, J. J.; Brothers, E.; Kudin, K. N.; Staroverov, V. N.; Kobayashi, R.; Normand, J.; Raghavachari, K.; Rendell, A.; Burant, J. C.; Iyengar, S. S.; Tomasi, J.; Cossi, M.; Rega, N.; Millam, M. J.; Klene, M.; Knox, J. E.; Cross, J. B.; Bakken, V.; Adamo, C.; Jaramillo, J.; Gomperts, R.; Stratmann, R. E.; Yazyev, O.; Austin, A. J.; Cammi, R.; Pomelli, C.; Ochterski, J. W.; Martin, R. L.; Morokuma, K.; Zakrzewski, V. G.; Voth, G. A.; Salvador, P.; Dannenberg, J. J.; Dapprich, S.; Daniels, A. D.; Farkas, Ö.; Foresman, J. B.; Ortiz, J. V.; Cioslowski, J.; Fox, D. J. Gaussian, Inc., Wallingford CT, 2009.

## The optimized cartesian coordinates and energy of all structures

**T0 : symmetry c1 -8907.9121123**

0 1

|   |          |          |          |
|---|----------|----------|----------|
| S | -1.4518  | 1.19734  | -1.19014 |
| S | -4.37734 | 0.53762  | -1.6365  |
| S | -7.65602 | 0.90356  | -1.36179 |
| C | -2.88267 | 0.27134  | -0.7048  |
| C | -5.37739 | -0.39156 | -0.49355 |
| C | -6.70988 | -0.23574 | -0.38519 |
| C | -9.12089 | 0.7962   | -0.3452  |
| S | -1.52406 | -1.20053 | 1.21629  |
| S | -4.44077 | -1.56469 | 0.46459  |
| S | -7.70369 | -1.19748 | 0.73702  |
| C | -2.91033 | -0.67884 | 0.24624  |
| C | -9.13157 | -0.15094 | 0.613    |
| S | 1.52406  | -1.19644 | -1.2203  |
| S | 4.44079  | -1.5631  | -0.4699  |
| S | 7.70365  | -1.19492 | -0.74119 |
| C | 2.91032  | -0.67805 | -0.24847 |
| C | 5.3774   | -0.39324 | 0.49222  |
| C | 6.7099   | -0.23706 | 0.38437  |
| C | 9.13154  | -0.14882 | -0.61361 |
| S | 1.45179  | 1.19319  | 1.19436  |
| S | 4.37736  | 0.53202  | 1.63836  |
| S | 7.65607  | 0.89885  | 1.36487  |

|    |           |          |          |
|----|-----------|----------|----------|
| C  | 2.88266   | 0.26887  | 0.7058   |
| C  | 9.1209    | 0.79501  | 0.34786  |
| S  | 10.4107   | -0.54282 | -1.76878 |
| H  | 11.31184  | 0.29363  | -1.20731 |
| S  | -10.41826 | 1.96498  | -0.65166 |
| H  | -10.9642  | 1.34381  | -1.72486 |
| Ge | 0.00001   | -0.04592 | -0.00007 |
| S  | 10.41828  | 1.96271  | 0.65831  |
| H  | 10.96414  | 1.33791  | 1.72945  |
| S  | -10.41076 | -0.54893 | 1.76677  |
| H  | -11.31185 | 0.28948  | 1.20818  |

**T1 : symmetry c1 -9037.1901523**

0 1

|   |             |             |             |
|---|-------------|-------------|-------------|
| S | -2.14648300 | 0.96762400  | -1.41737700 |
| S | -5.05356500 | 0.16122900  | -1.72586300 |
| S | -8.33983100 | 0.51628100  | -1.51737900 |
| C | -3.55835700 | 0.12296500  | -0.75827500 |
| C | -6.03752500 | -0.53973500 | -0.41799500 |
| C | -7.37265800 | -0.38900600 | -0.33802200 |
| C | -9.80057500 | 0.59092000  | -0.49154500 |
| S | -2.17644100 | -0.90185400 | 1.41986200  |
| S | -5.07950800 | -1.48033100 | 0.75220800  |
| S | -8.34821600 | -1.12581500 | 0.95676700  |
| C | -3.56921600 | -0.61848000 | 0.36346500  |
| C | -9.79328800 | -0.14669600 | 0.63591400  |

|    |              |             |             |
|----|--------------|-------------|-------------|
| S  | 0.88507100   | -1.31329000 | -0.96079900 |
| S  | 3.81019500   | -1.43288200 | -0.17603900 |
| S  | 7.09731600   | -1.08886600 | -0.41366600 |
| C  | 2.25355600   | -0.56983200 | -0.11944800 |
| C  | 4.71115700   | -0.08425900 | 0.55504000  |
| C  | 6.04597700   | 0.04752200  | 0.44371000  |
| C  | 8.45964900   | 0.07078300  | -0.56990600 |
| S  | 0.73984400   | 1.51180100  | 0.92464500  |
| S  | 3.68163400   | 1.03848500  | 1.47540200  |
| S  | 6.94262600   | 1.39303300  | 1.19587000  |
| C  | 2.19647900   | 0.54890000  | 0.62398500  |
| C  | 8.37227700   | 1.20447500  | 0.18986000  |
| S  | 9.78797700   | -0.35112900 | -1.57578500 |
| S  | -11.11683200 | 1.65605200  | -1.01662000 |
| Ge | -0.67554700  | 0.02269800  | -0.00058900 |
| S  | 9.52941500   | 2.51551700  | 0.33302900  |
| S  | -11.06183500 | -0.32613300 | 1.85408000  |
| H  | -11.97686100 | 0.37447600  | 1.14787300  |
| H  | -11.66148500 | 0.82261500  | -1.93565800 |
| H  | 10.47472300  | 1.89818200  | -0.41074200 |
| N  | 10.94969700  | -1.27351700 | -0.27777000 |
| O  | 10.59445800  | -1.27911300 | 0.86980700  |
| O  | 11.93885600  | -1.74187500 | -0.77884400 |

**T2 : symmetry c1            -9166.4711763**

0 1



|   |              |             |             |
|---|--------------|-------------|-------------|
| S | 0.70527900   | 1.60810200  | -0.52898200 |
| S | 3.64682700   | 1.50918500  | 0.19924000  |
| S | 6.90523000   | 1.33648800  | -0.30730900 |
| C | 2.10603400   | 0.64621200  | -0.03230800 |
| C | 4.58652000   | 0.00639100  | 0.37224500  |
| C | 5.91476500   | -0.06178300 | 0.17130500  |
| C | 8.35173300   | 0.39572900  | -0.72842900 |
| S | 0.64927500   | -1.70278400 | 0.23534300  |
| S | 3.59754000   | -1.39037500 | 0.86515500  |
| S | 6.86212500   | -1.55463700 | 0.36297800  |
| C | 2.08478800   | -0.66415100 | 0.26850900  |
| C | 8.32872400   | -0.93729800 | -0.42832700 |
| S | -2.31274900  | -0.42310300 | -1.69162700 |
| S | -5.22467500  | 0.42069400  | -1.63361300 |
| S | -8.48994400  | 0.00870400  | -1.51748800 |
| C | -3.71026100  | 0.11822700  | -0.74590200 |
| C | -6.18149000  | 0.60439500  | -0.14274000 |
| C | -7.51564400  | 0.43483400  | -0.08891600 |
| C | -9.93568000  | -0.43764800 | -0.59016600 |
| S | -2.28127300  | 0.31050500  | 1.62476700  |
| S | -5.19852900  | 1.06552700  | 1.26822300  |
| S | -8.48296900  | 0.65301400  | 1.38190000  |
| C | -3.69730900  | 0.41100200  | 0.56654900  |
| C | -9.94346900  | -0.13679100 | 0.72312300  |
| S | -11.20484500 | -1.18946100 | -1.56476300 |
| H | -12.12035000 | -1.16441800 | -0.57080900 |

|    |              |             |             |
|----|--------------|-------------|-------------|
| S  | 9.66365800   | 1.26726800  | -1.46823100 |
| Ge | -0.80920300  | -0.01401700 | -0.06657400 |
| S  | -11.26080500 | -0.49635000 | 1.85382600  |
| H  | -11.80169500 | 0.74521700  | 1.89379900  |
| S  | 9.60288300   | -2.08681000 | -0.70096100 |
| O  | 10.07552000  | 1.87386600  | 1.17687800  |
| O  | 10.40087400  | -0.98153500 | 1.67229300  |
| N  | 10.53708900  | 2.13069600  | 0.15604000  |
| N  | 10.72586500  | -1.83370500 | 0.97096200  |

**T3: symmetry c1 -9316.8630288**

0 1

|   |          |          |          |
|---|----------|----------|----------|
| S | 1.46768  | -1.72691 | -0.57862 |
| S | 4.39213  | -1.26854 | -1.23445 |
| S | 7.66092  | -1.45015 | -0.89036 |
| C | 2.88827  | -0.67421 | -0.48815 |
| C | 5.37853  | 0.04936  | -0.55774 |
| C | 6.71615  | -0.0124  | -0.42176 |
| C | 9.08054  | -1.01395 | 0.05094  |
| S | 1.50858  | 1.42458  | 0.69547  |
| S | 4.42844  | 1.48551  | -0.10976 |
| S | 7.72313  | 1.30709  | 0.19152  |
| C | 2.90573  | 0.57176  | 0.01678  |
| C | 9.12602  | 0.2513   | 0.56768  |
| S | -1.43546 | -0.69322 | 1.67474  |
| S | -4.39076 | -1.24971 | 1.30321  |

|    |           |          |          |
|----|-----------|----------|----------|
| S  | -7.6385   | -0.80479 | 1.58792  |
| C  | -2.88402  | -0.54827 | 0.66457  |
| C  | -5.39514  | -0.53677 | 0.0183   |
| C  | -6.72535  | -0.35997 | 0.12242  |
| C  | -9.04143  | 0.18137  | 1.19942  |
| S  | -1.53047  | 0.60441  | -1.46606 |
| S  | -4.47569  | -0.1124  | -1.44465 |
| S  | -7.75387  | 0.28907  | -1.16286 |
| C  | -2.92145  | -0.03766 | -0.57863 |
| C  | -9.11065  | 0.70415  | -0.06224 |
| S  | -10.19987 | 0.32946  | 2.50866  |
| H  | -11.12417 | 0.96561  | 1.75437  |
| S  | 10.28386  | -2.28534 | 0.16716  |
| H  | 11.20233  | -1.50001 | 0.77354  |
| Ge | 0.00131   | -0.11436 | 0.04042  |
| S  | -10.41509 | 1.63629  | -0.6818  |
| S  | 10.43841  | 0.91532  | 1.45698  |
| N  | -11.60975 | 0.20509  | -1.32363 |
| O  | -11.28057 | -0.92738 | -1.09514 |
| O  | -12.58873 | 0.62334  | -1.88503 |
| N  | 11.56752  | 1.58826  | -0.01286 |
| O  | 11.21081  | 1.34449  | -1.13373 |
| O  | 12.54064  | 2.18227  | 0.37279  |

**T4: symmetry c1 -9295.7520543**

0 1

|   |             |             |             |
|---|-------------|-------------|-------------|
| S | -1.11015500 | -1.37855300 | -0.91203100 |
| S | -4.04951800 | -1.51429000 | -0.17869200 |
| S | -7.31339400 | -1.26202800 | -0.61912900 |
| C | -2.52173000 | -0.59844700 | -0.18153500 |
| C | -5.00850600 | -0.12047400 | 0.37709400  |
| C | -6.33832700 | -0.02057900 | 0.20106500  |
| C | -8.76668900 | -0.25646400 | -0.79976200 |
| S | -1.09619300 | 1.62297300  | 0.68198400  |
| S | -4.03640400 | 1.11551500  | 1.21320500  |
| S | -7.30336500 | 1.36124600  | 0.76763900  |
| C | -2.51693300 | 0.58998400  | 0.44737800  |
| C | -8.75793200 | 0.95658300  | -0.17062600 |
| S | 1.86885500  | 0.93366400  | -1.52054000 |
| S | 4.80061300  | 0.17527400  | -1.67922700 |
| S | 8.05376400  | 0.63520800  | -1.45005700 |
| C | 3.28358600  | 0.19985600  | -0.74574900 |
| C | 5.76935200  | -0.36882400 | -0.28775400 |
| C | 7.09933500  | -0.18828900 | -0.19065200 |
| C | 9.52970200  | 0.76946500  | -0.48399400 |
| S | 1.87242100  | -0.63735500 | 1.49203200  |
| S | 4.80448600  | -1.19937600 | 0.95738800  |
| S | 8.07573200  | -0.74754100 | 1.18149900  |
| C | 3.28460700  | -0.42395800 | 0.44555500  |
| C | 9.54671000  | 0.16185200  | 0.72725100  |
| S | 10.84654900 | 1.77634200  | -1.10923400 |
| H | 10.64257100 | 1.47056900  | -2.40927500 |

|    |              |             |             |
|----|--------------|-------------|-------------|
| S  | -10.06575500 | -0.92105900 | -1.74808800 |
| Ge | 0.38358700   | 0.09277400  | -0.05171500 |
| S  | 10.91457500  | 0.03815000  | 1.78794400  |
| S  | -10.03839500 | 2.13093700  | -0.15660700 |
| N  | 11.95930600  | -1.37573500 | 0.73010600  |
| N  | -10.91985300 | -2.20400500 | -0.41479000 |
| N  | -11.21091300 | 1.42622500  | 1.34005200  |
| O  | 11.49635800  | -1.64328800 | -0.28657900 |
| O  | -10.45870400 | -2.22351000 | 0.63763100  |
| O  | -10.90230900 | 0.41246200  | 1.78864400  |

**T5 : symmetry c1            -9425.0302378**

0 1

|   |             |             |             |
|---|-------------|-------------|-------------|
| S | -1.49438100 | 1.38398900  | -1.13842300 |
| S | -4.43296900 | 0.72395000  | -1.47676200 |
| S | -7.70122200 | 1.06696600  | -1.10387100 |
| C | -2.90628100 | 0.45869300  | -0.59909800 |
| C | -5.39161000 | -0.21576500 | -0.30632500 |
| C | -6.72154000 | -0.07779300 | -0.15943400 |
| C | -9.15257100 | 0.93969200  | -0.08583900 |
| S | -1.47795700 | -1.01053900 | 1.27257500  |
| S | -4.41890400 | -1.37641700 | 0.63090700  |
| S | -7.68170200 | -1.02782400 | 0.99834400  |
| C | -2.89892700 | -0.49030000 | 0.35347400  |
| C | -9.14748200 | -0.03229600 | 0.87463400  |
| S | 1.47784300  | -1.01055300 | -1.27228300 |

|    |              |             |             |
|----|--------------|-------------|-------------|
| S  | 4.41882900   | -1.37650400 | -0.63091700 |
| S  | 7.68160100   | -1.02779700 | -0.99872100 |
| C  | 2.89889700   | -0.49043000 | -0.35322600 |
| C  | 5.39164200   | -0.21595500 | 0.30633200  |
| C  | 6.72155300   | -0.07796700 | 0.15931700  |
| C  | 9.14742600   | -0.03227700 | -0.87499800 |
| S  | 1.49449800   | 1.38362000  | 1.13913400  |
| S  | 4.43311800   | 0.72362400  | 1.47699400  |
| S  | 7.70131900   | 1.06668200  | 1.10381100  |
| C  | 2.90633400   | 0.45839900  | 0.59951500  |
| C  | 9.15250500   | 0.93962200  | 0.08556300  |
| S  | 10.44084000  | -0.40393300 | -1.97832200 |
| S  | -10.44880300 | 2.03959500  | -0.44563300 |
| Ge | 0.00001100   | 0.14323300  | 0.00022700  |
| S  | 10.44873600  | 2.03954300  | 0.44539400  |
| S  | -10.44100800 | -0.40408200 | 1.97783300  |
| N  | 11.59655100  | 0.91225400  | 1.67909800  |
| N  | -11.59650200 | 0.91175800  | -1.67959700 |
| N  | -11.27547400 | -2.03132800 | 1.07875700  |
| O  | 11.26821100  | -0.18231800 | 1.81440800  |
| O  | -11.26766000 | -0.18262200 | -1.81485600 |
| O  | -10.81100900 | -2.35124400 | 0.07742900  |
| N  | 11.27534100  | -2.03155200 | -1.07881800 |
| O  | 10.81085100  | -2.35109200 | -0.07745900 |

**T6 : symmetry c1            -9000.1158294**

0 1

|   |          |          |          |
|---|----------|----------|----------|
| S | -1.8995  | -0.55957 | -1.6205  |
| S | -4.82269 | -1.20154 | -1.12082 |
| S | -8.09618 | -0.71338 | -1.22183 |
| C | -3.29295 | -0.50571 | -0.5291  |
| C | -5.76351 | -0.55558 | 0.24587  |
| C | -7.09364 | -0.35535 | 0.19684  |
| C | -9.52506 | 0.18017  | -0.63021 |
| S | -1.84069 | 0.5485   | 1.59047  |
| S | -4.77024 | -0.22989 | 1.68787  |
| S | -8.02599 | 0.26037  | 1.58358  |
| C | -3.2703  | -0.065   | 0.74122  |
| C | -9.48221 | 0.6299   | 0.6391   |
| S | 1.09188  | 1.54741  | -0.53471 |
| S | 4.01955  | 1.11727  | -1.18212 |
| S | 7.31585  | 1.23415  | -0.89093 |
| C | 2.51003  | 0.48653  | -0.48032 |
| C | 4.99882  | -0.24087 | -0.58007 |
| C | 6.3383   | -0.18809 | -0.46106 |
| C | 8.68279  | 0.74173  | 0.1377   |
| S | 1.11678  | -1.65815 | 0.59732  |
| S | 4.04118  | -1.69108 | -0.19826 |
| S | 7.33686  | -1.55194 | 0.1019   |
| C | 2.51908  | -0.78193 | -0.03487 |
| C | 8.70534  | -0.53109 | 0.58255  |
| S | 9.90131  | 1.99318  | 0.47533  |

|    |           |          |          |
|----|-----------|----------|----------|
| S  | -10.85881 | 0.43833  | -1.76924 |
| Ge | -0.38534  | -0.07072 | -0.01006 |
| S  | 9.93703   | -1.33288 | 1.56912  |
| S  | -10.71388 | 1.51803  | 1.5446   |
| H  | -11.65073 | 1.40065  | 0.57732  |
| H  | -11.42329 | -0.78857 | -1.65976 |
| H  | 10.99888  | -1.0029  | 0.79914  |
| C  | 11.24278  | 1.33939  | -0.35277 |
| N  | 12.18141  | 0.88975  | -0.86182 |

**T7: symmetry c1 -9092.3130741**

0 1

|   |          |          |          |
|---|----------|----------|----------|
| S | 0.75626  | 1.63294  | -0.14531 |
| S | 3.69929  | 1.47745  | 0.55636  |
| S | 6.95775  | 1.51309  | 0.07351  |
| C | 2.18512  | 0.63012  | 0.15411  |
| C | 4.68239  | -0.00088 | 0.446    |
| C | 6.01287  | 0.00988  | 0.24835  |
| C | 8.41914  | 0.70123  | -0.50475 |
| S | 0.79975  | -1.76568 | -0.05125 |
| S | 3.73766  | -1.49509 | 0.64462  |
| S | 6.999    | -1.4714  | 0.14198  |
| C | 2.20145  | -0.71386 | 0.19356  |
| C | 8.44044  | -0.64554 | -0.46477 |
| S | -2.20073 | 0.04084  | 1.67063  |
| S | -5.1265  | -0.74083 | 1.47532  |



|    |           |          |          |
|----|-----------|----------|----------|
| S  | -8.38355  | -0.24023 | 1.45118  |
| C  | -3.60883  | -0.30036 | 0.65208  |
| C  | -6.08902  | -0.6242  | -0.0187  |
| C  | -7.41889  | -0.41701 | -0.03506 |
| C  | -9.82328  | 0.3909   | 0.62767  |
| S  | -2.19089  | -0.07653 | -1.72504 |
| S  | -5.11738  | -0.83765 | -1.49551 |
| S  | -8.38913  | -0.33706 | -1.51752 |
| C  | -3.60578  | -0.34518 | -0.69196 |
| C  | -9.83688  | 0.33815  | -0.71855 |
| S  | -11.07958 | 0.96874  | 1.72913  |
| H  | -11.99467 | 1.1456   | 0.75015  |
| S  | 9.73319   | 1.70023  | -1.18178 |
| Ge | -0.71262  | -0.07319 | -0.02976 |
| S  | -11.14822 | 0.92195  | -1.75885 |
| H  | -11.70943 | -0.2818  | -2.0267  |
| S  | 9.79356   | -1.67894 | -1.00986 |
| C  | 10.10951  | 2.6724   | 0.17016  |
| C  | 10.61165  | -1.90695 | 0.4725   |
| N  | 10.41064  | 3.38119  | 1.03416  |
| N  | 11.21513  | -2.10171 | 1.44058  |

**T8 : symmetry c1 -9092.3194008**

0 1

|   |          |          |          |
|---|----------|----------|----------|
| S | -1.43998 | 0.49446  | -1.65653 |
| S | -4.37559 | -0.24992 | -1.74231 |

|   |           |          |          |
|---|-----------|----------|----------|
| S | -7.66603  | 0.1315   | -1.70917 |
| C | -2.8799   | -0.07319 | -0.79339 |
| C | -5.38211  | -0.54957 | -0.30556 |
| C | -6.71922  | -0.39756 | -0.29601 |
| C | -9.05471  | 0.67607  | -0.74953 |
| S | -1.52988  | -0.49213 | 1.59517  |
| S | -4.45473  | -1.11705 | 1.10307  |
| S | -7.74472  | -0.74831 | 1.11404  |
| C | -2.91449  | -0.46547 | 0.49216  |
| C | -9.0776   | 0.28223  | 0.53991  |
| S | 1.50174   | -1.67601 | -0.5528  |
| S | 4.4171    | -1.68725 | 0.27695  |
| S | 7.71348   | -1.56237 | -0.01625 |
| C | 2.90027   | -0.7803  | 0.06093  |
| C | 5.37499   | -0.22427 | 0.60701  |
| C | 6.71487   | -0.177   | 0.49049  |
| C | 9.08744   | -0.5632  | -0.52594 |
| S | 1.47486   | 1.57029  | 0.45505  |
| S | 4.39399   | 1.15642  | 1.15283  |
| S | 7.69199   | 1.25974  | 0.86963  |
| C | 2.89046   | 0.50431  | 0.45761  |
| C | 9.06491   | 0.72548  | -0.12955 |
| S | 10.32324  | -1.40432 | -1.47372 |
| H | 11.38097  | -1.04733 | -0.71013 |
| S | -10.24408 | 1.6509   | -1.62607 |
| H | -11.32851 | 0.91106  | -1.30046 |

|    |           |          |          |
|----|-----------|----------|----------|
| Ge | 0.00112   | -0.0644  | -0.01945 |
| S  | 10.28919  | 1.9606   | -0.50471 |
| S  | -10.32684 | 0.68911  | 1.7396   |
| C  | 11.62288  | 1.33316  | 0.35574  |
| C  | -11.66156 | -0.14351 | 1.07781  |
| N  | 12.55632  | 0.89898  | 0.88723  |
| N  | -12.59425 | -0.6556  | 0.61939  |

**T9: symmetry c1 -9184.51656**

0 1

|   |          |          |          |
|---|----------|----------|----------|
| S | -1.13805 | -1.64103 | -0.1414  |
| S | -4.08675 | -1.48684 | 0.53802  |
| S | -7.33753 | -1.51637 | 0.00606  |
| C | -2.56909 | -0.6388  | 0.15099  |
| C | -5.0673  | -0.0068  | 0.42254  |
| C | -6.39469 | -0.01497 | 0.20533  |
| C | -8.80244 | -0.69965 | -0.5547  |
| S | -1.17936 | 1.75666  | -0.02937 |
| S | -4.12315 | 1.4852   | 0.64214  |
| S | -7.3768  | 1.46868  | 0.09422  |
| C | -2.58459 | 0.70503  | 0.19765  |
| C | -8.82254 | 0.64688  | -0.50721 |
| S | 1.79771  | -0.05867 | 1.72003  |
| S | 4.729    | 0.69698  | 1.56364  |
| S | 8.02055  | 0.33062  | 1.57059  |

|    |           |          |          |
|----|-----------|----------|----------|
| C  | 3.21873   | 0.27841  | 0.71874  |
| C  | 5.7096    | 0.62346  | 0.08035  |
| C  | 7.04748   | 0.47812  | 0.08592  |
| C  | 9.39958   | -0.43302 | 0.75768  |
| S  | 1.82776   | 0.07706  | -1.67659 |
| S  | 4.7551    | 0.81045  | -1.40994 |
| S  | 8.04748   | 0.46169  | -1.38446 |
| C  | 3.23137   | 0.3303   | -0.62471 |
| C  | 9.39898   | -0.38118 | -0.58977 |
| S  | 10.61048  | -1.14639 | 1.83359  |
| H  | 11.68333  | -0.51051 | 1.31048  |
| S  | -10.12145 | -1.69657 | -1.22558 |
| Ge | 0.3281    | 0.06328  | 0.00164  |
| S  | 10.63289  | -1.07447 | -1.66779 |
| S  | -10.17813 | 1.68126  | -1.0432  |
| C  | 11.97199  | -0.09822 | -1.25953 |
| C  | -10.50534 | -2.65453 | 0.13456  |
| C  | -10.94817 | 1.96428  | 0.45542  |
| N  | 12.90797  | 0.51554  | -0.96036 |
| N  | -11.51874 | 2.19697  | 1.435    |
| N  | -10.81206 | -3.35284 | 1.00506  |

**T10 : symmetry c1 -9276.7136587**

0 1

|   |         |         |         |
|---|---------|---------|---------|
| S | 1.4778  | 1.47503 | 0.82444 |
| S | 4.41396 | 0.8793  | 1.28959 |

|    |          |          |          |
|----|----------|----------|----------|
| S  | 7.67901  | 1.17562  | 0.92135  |
| C  | 2.89697  | 0.48898  | 0.44181  |
| C  | 5.38578  | -0.22075 | 0.28328  |
| C  | 6.71739  | -0.10424 | 0.13464  |
| C  | 9.16759  | 0.81512  | 0.0395   |
| S  | 1.49205  | -1.24954 | -1.20563 |
| S  | 4.42543  | -1.50299 | -0.49171 |
| S  | 7.68609  | -1.21734 | -0.86824 |
| C  | 2.90335  | -0.58817 | -0.36351 |
| C  | 9.17017  | -0.26274 | -0.76946 |
| S  | -1.51501 | 0.97996  | -1.49559 |
| S  | -4.45499 | 1.36793  | -0.87213 |
| S  | -7.70797 | 0.90774  | -1.15521 |
| C  | -2.91477 | 0.55684  | -0.49528 |
| C  | -5.39206 | 0.33069  | 0.22925  |
| C  | -6.71918 | 0.14309  | 0.11762  |
| C  | -9.16471 | -0.02911 | -0.8025  |
| S  | -1.45639 | -1.06998 | 1.21657  |
| S  | -4.40325 | -0.42032 | 1.50394  |
| S  | -7.65402 | -0.89385 | 1.22766  |
| C  | -2.89051 | -0.25199 | 0.57875  |
| C  | -9.14072 | -0.84022 | 0.27347  |
| S  | -10.5365 | 0.11316  | -1.93668 |
| S  | 10.53626 | 1.9446   | 0.24633  |
| Ge | -0.00105 | 0.04033  | -0.11961 |
| S  | -10.4769 | -1.91349 | 0.7782   |

|   |           |          |          |
|---|-----------|----------|----------|
| S | 10.54041  | -0.75199 | -1.80448 |
| C | -11.07101 | -1.04171 | 2.12177  |
| C | 11.09345  | 1.46098  | 1.78711  |
| C | 11.00123  | -2.20394 | -1.03191 |
| N | -11.52169 | -0.50863 | 3.04481  |
| N | 11.36342  | -3.20091 | -0.56908 |
| N | 11.52076  | 1.19035  | 2.828    |
| C | -11.05381 | 1.70319  | -1.58789 |
| N | -11.45353 | 2.77514  | -1.4133  |

**T11: symmetry c1 -9113.4275079**

0 1

|   |          |          |          |
|---|----------|----------|----------|
| S | -2.29456 | 1.35599  | -1.1576  |
| S | -5.20061 | 0.62     | -1.61545 |
| S | -8.48403 | 0.85522  | -1.2572  |
| C | -3.68322 | 0.34352  | -0.72395 |
| C | -6.14815 | -0.42276 | -0.52686 |
| C | -7.48251 | -0.31947 | -0.38361 |
| C | -9.92463 | 0.6246   | -0.22643 |
| S | -2.24354 | -1.21106 | 1.06926  |
| S | -5.15531 | -1.6299  | 0.32685  |
| S | -8.42173 | -1.39252 | 0.68294  |
| C | -3.66188 | -0.67338 | 0.15556  |
| C | -9.88536 | -0.38906 | 0.66025  |
| S | 0.77689  | -0.90332 | -1.38349 |

|    |           |          |          |
|----|-----------|----------|----------|
| S  | 3.7041    | -1.22912 | -0.66093 |
| S  | 6.96735   | -0.74074 | -0.8873  |
| C  | 2.14737   | -0.4106  | -0.37768 |
| C  | 4.60417   | -0.11371 | 0.3944   |
| C  | 5.93228   | 0.08043  | 0.3019   |
| C  | 8.40491   | 0.25166  | -0.55576 |
| S  | 0.63097   | 1.30102  | 1.19769  |
| S  | 3.57548   | 0.70223  | 1.59599  |
| S  | 6.82313   | 1.19353  | 1.37329  |
| C  | 2.09015   | 0.46377  | 0.64253  |
| C  | 8.3366    | 1.13596  | 0.46135  |
| S  | 9.79866   | 0.00567  | -1.61795 |
| S  | -11.2652  | 1.76764  | -0.42503 |
| H  | -11.81363 | 1.20474  | -1.52867 |
| Ge | -0.78392  | 0.0907   | -0.07191 |
| S  | 9.62256   | 2.27045  | 0.90509  |
| H  | 9.44327   | 2.15683  | 2.2396   |
| S  | -11.1274  | -0.9127  | 1.80418  |
| H  | -12.0664  | -0.06703 | 1.32449  |
| C  | 10.82058  | -1.16616 | -0.69391 |
| O  | 11.85436  | -1.56346 | -1.1497  |
| C  | 10.33662  | -1.57603 | 0.62735  |
| N  | 10.00829  | -1.92858 | 1.67531  |

**T12 : symmetry c1 -9394.9283441**

0 1

|   |          |          |          |
|---|----------|----------|----------|
| S | 0.36387  | -1.71034 | 0.54361  |
| S | -2.57781 | -1.36682 | 1.16892  |
| S | -5.86485 | -1.55907 | 0.96096  |
| C | -1.08432 | -0.69365 | 0.4735   |
| C | -3.59431 | -0.03238 | 0.58296  |
| C | -4.93545 | -0.11315 | 0.49545  |
| C | -7.2936  | -1.07705 | 0.02656  |
| S | 0.24528  | 1.48877  | -0.60781 |
| S | -2.68124 | 1.43315  | 0.16503  |
| S | -5.96508 | 1.23044  | -0.07275 |
| C | -1.1307  | 0.5714   | 0.0205   |
| C | -7.34453 | 0.18759  | -0.43553 |
| S | 3.29815  | 0.4803   | 1.60568  |
| S | 6.20627  | 1.18467  | 1.09642  |
| S | 9.46906  | 0.72933  | 1.21578  |
| C | 4.69094  | 0.45181  | 0.51166  |
| C | 7.15766  | 0.54299  | -0.26587 |
| C | 8.48937  | 0.35169  | -0.22206 |
| C | 10.909   | -0.14461 | 0.65709  |
| S | 3.25795  | -0.64113 | -1.60138 |
| S | 6.17016  | 0.19975  | -1.70738 |
| S | 9.44584  | -0.25412 | -1.58691 |
| C | 4.6758   | 0.00655  | -0.75725 |
| C | 10.90934 | -0.58212 | -0.61721 |
| S | 12.18247 | -0.27457 | 1.87625  |
| H | 13.08826 | -0.79244 | 1.01688  |



|    |           |          |          |
|----|-----------|----------|----------|
| S  | -8.51394  | -2.37542 | -0.20184 |
| Ge | 1.797     | -0.05369 | 0.00247  |
| S  | 12.21779  | -1.49197 | -1.39352 |
| H  | 12.76211  | -0.46162 | -2.08472 |
| S  | -8.71505  | 0.84275  | -1.48861 |
| C  | -9.94688  | -1.61878 | -0.14921 |
| C  | -8.97181  | 2.39178  | -1.26335 |
| C  | -11.19232 | -2.26755 | -0.46262 |
| O  | -11.62114 | -2.3832  | -1.59551 |
| C  | -8.44663  | 3.46113  | -0.47911 |
| O  | -7.47032  | 4.12658  | -0.78001 |
| C  | -9.27051  | 3.77571  | 0.70372  |
| N  | -9.87989  | 4.00526  | 1.65627  |
| C  | -11.97461 | -2.65451 | 0.72515  |
| N  | -12.56629 | -3.0006  | 1.65335  |

**T13: symmetry c1 -9318.9428393**

0 1

|   |         |          |          |
|---|---------|----------|----------|
| S | 1.46336 | 1.54757  | -1.06026 |
| S | 4.41924 | 1.72167  | -0.41031 |
| S | 7.65584 | 1.44876  | -0.95883 |
| C | 2.89674 | 0.8002   | -0.33488 |
| C | 5.39665 | 0.35546  | 0.17841  |
| C | 6.71917 | 0.2409   | -0.04045 |
| C | 9.13291 | 0.48251  | -1.06025 |
| S | 1.50092 | -1.37987 | 0.66484  |

|    |           |          |          |
|----|-----------|----------|----------|
| S  | 4.45255   | -0.8376  | 1.10252  |
| S  | 7.70053   | -1.11713 | 0.5534   |
| C  | 2.911     | -0.35703 | 0.3501   |
| C  | 9.15606   | -0.67447 | -0.36607 |
| S  | -1.43649  | 1.08943  | 1.38258  |
| S  | -4.36931  | 0.37051  | 1.66902  |
| S  | -7.62411  | 0.85032  | 1.50705  |
| C  | -2.87792  | 0.32547  | 0.69535  |
| C  | -5.38109  | -0.24369 | 0.33969  |
| C  | -6.71109  | -0.05305 | 0.27014  |
| C  | -9.13362  | 0.92288  | 0.58953  |
| S  | -1.54014  | -0.65844 | -1.53021 |
| S  | -4.4598   | -1.1527  | -0.88254 |
| S  | -7.72662  | -0.67175 | -1.05117 |
| C  | -2.92004  | -0.36448 | -0.45821 |
| C  | -9.18272  | 0.22407  | -0.56386 |
| S  | -10.44035 | 1.94381  | 1.21257  |
| H  | -10.28762 | 1.57951  | 2.50493  |
| S  | 10.4415   | 1.06655  | -2.10166 |
| H  | 10.33883  | 2.36138  | -1.72856 |
| Ge | -0.00195  | 0.1383   | -0.09179 |
| S  | -10.56751 | 0.13641  | -1.66239 |
| S  | 10.5053   | -1.81823 | -0.3062  |
| C  | 11.55203  | -1.15318 | 1.01063  |
| O  | 12.56095  | -1.71483 | 1.32798  |
| C  | -11.56999 | -1.19426 | -0.95789 |

|   |           |          |          |
|---|-----------|----------|----------|
| O | -12.59193 | -1.52999 | -1.48422 |
| C | 11.12029  | 0.09957  | 1.63679  |
| N | 10.83262  | 1.08708  | 2.15868  |
| C | -11.08629 | -1.80877 | 0.28156  |
| N | -10.75716 | -2.32277 | 1.26023  |

**T14: symmetry c1 -9524.4583333**

0 1

|   |          |          |          |
|---|----------|----------|----------|
| S | -0.7903  | -1.4794  | -0.77293 |
| S | -3.75025 | -1.62559 | -0.14274 |
| S | -7.01111 | -1.4026  | -0.64434 |
| C | -2.2274  | -0.7041  | -0.08562 |
| C | -4.73089 | -0.24648 | 0.40501  |
| C | -6.05811 | -0.15928 | 0.20272  |
| C | -8.42391 | -0.36363 | -0.89965 |
| S | -0.83867 | 1.513    | 0.84139  |
| S | -3.79222 | 0.98998  | 1.27386  |
| S | -7.04779 | 1.20643  | 0.77569  |
| C | -2.24542 | 0.47813  | 0.55466  |
| C | -8.42471 | 0.83323  | -0.27186 |
| S | 2.12449  | -0.89897 | 1.62591  |
| S | 5.05077  | -0.14154 | 1.861    |
| S | 8.34777  | -0.47841 | 1.73235  |
| C | 3.55293  | -0.14669 | 0.89827  |
| C | 6.04665  | 0.4539   | 0.51147  |
| C | 7.38514  | 0.32198  | 0.46603  |

|    |           |          |          |
|----|-----------|----------|----------|
| C  | 9.75564   | -0.75702 | 0.69438  |
| S  | 2.18743   | 0.73502  | -1.35355 |
| S  | 5.10532   | 1.28294  | -0.75123 |
| S  | 8.3947    | 0.96765  | -0.84712 |
| C  | 3.57844   | 0.49785  | -0.2815  |
| C  | 9.76514   | -0.11337 | -0.49127 |
| S  | 10.9872   | -1.84946 | 1.35181  |
| H  | 11.96454  | -0.91754 | 1.41867  |
| S  | -9.66839  | -0.9099  | -2.03516 |
| Ge | 0.67093   | -0.02096 | 0.12801  |
| S  | 10.99099  | -0.23175 | -1.75475 |
| S  | -9.61178  | 2.13759  | -0.44353 |
| C  | -11.054   | 1.46223  | 0.40586  |
| O  | -11.17093 | 0.35479  | 0.84571  |
| C  | -10.72276 | -2.02641 | -1.05974 |
| O  | -11.72997 | -2.44918 | -1.54717 |
| C  | 12.39812  | 0.57612  | -0.98113 |
| O  | 12.46583  | 0.95663  | 0.15668  |
| C  | -12.11379 | 2.46773  | 0.47448  |
| N  | -12.94476 | 3.26588  | 0.52802  |
| C  | -10.25717 | -2.42719 | 0.26488  |
| N  | -9.90544  | -2.81751 | 1.29117  |
| C  | 13.513    | 0.6903   | -1.92226 |
| N  | 14.38931  | 0.78401  | -2.66657 |

**T15: symmetry c1**

**-9729.9671302**

0 1

|   |           |          |          |
|---|-----------|----------|----------|
| S | 1.60324   | 1.37553  | 0.7797   |
| S | 4.52958   | 0.75307  | 1.2466   |
| S | 7.81214   | 0.81517  | 0.95166  |
| C | 2.9865    | 0.30979  | 0.47815  |
| C | 5.45176   | -0.48817 | 0.36633  |
| C | 6.78912   | -0.45034 | 0.22393  |
| C | 9.16088   | 0.527    | -0.17112 |
| S | 1.50316   | -1.54692 | -0.95634 |
| S | 4.44215   | -1.80922 | -0.26648 |
| S | 7.72953   | -1.68708 | -0.63985 |
| C | 2.94587   | -0.84656 | -0.20645 |
| C | 9.13881   | -0.63477 | -0.86614 |
| S | -1.43559  | -0.81761 | 1.50399  |
| S | -4.38396  | -1.26159 | 0.95835  |
| S | -7.64698  | -0.80628 | 1.18203  |
| C | -2.84404  | -0.50724 | 0.47786  |
| C | -5.32814  | -0.36105 | -0.25069 |
| C | -6.6581   | -0.17952 | -0.15997 |
| C | -9.05948  | 0.19811  | 0.81477  |
| S | -1.39513  | 0.89607  | -1.43067 |
| S | -4.3486   | 0.24516  | -1.60677 |
| S | -7.61488  | 0.69187  | -1.38411 |
| C | -2.8288   | 0.17301  | -0.68207 |
| C | -9.03002  | 0.89712  | -0.34143 |
| S | -10.34552 | 0.30491  | 2.02798  |

|    |           |          |          |
|----|-----------|----------|----------|
| S  | 10.39592  | 1.75746  | -0.49838 |
| Ge | 0.06857   | -0.06673 | -0.01532 |
| S  | -10.21775 | 2.08259  | -0.91049 |
| S  | 10.34462  | -1.1722  | -2.04887 |
| C  | 11.6356   | -1.92855 | -1.02433 |
| O  | 12.60512  | -2.40627 | -1.5375  |
| C  | 10.57249  | 2.58632  | 1.08169  |
| O  | 9.9607    | 2.35683  | 2.08748  |
| C  | -11.62227 | 1.0355   | -1.34682 |
| O  | -11.72171 | -0.14181 | -1.15331 |
| C  | -11.36809 | -1.17321 | 1.74743  |
| O  | -12.39315 | -1.29426 | 2.35198  |
| C  | 11.43402  | -1.91205 | 0.42496  |
| N  | 11.32293  | -1.9219  | 1.57298  |
| C  | 11.58129  | 3.64205  | 0.983    |
| N  | 12.37893  | 4.47218  | 0.91227  |
| C  | -10.85864 | -2.19994 | 0.84292  |
| N  | -10.47342 | -3.06306 | 0.18264  |
| C  | -12.67463 | 1.83738  | -1.96969 |
| N  | -13.49953 | 2.47493  | -2.46312 |

**T16 : symmetry c1      -9021.2197938**

0 1

|   |          |          |         |
|---|----------|----------|---------|
| S | -1.94924 | -0.39607 | 1.64893 |
|---|----------|----------|---------|

|    |           |          |          |
|----|-----------|----------|----------|
| S  | -4.88357  | 0.37386  | 1.59987  |
| S  | -8.15023  | -0.13441 | 1.42587  |
| C  | -3.35302  | 0.1471   | 0.71638  |
| C  | -5.83276  | 0.58182  | 0.108    |
| C  | -7.16031  | 0.36953  | 0.04303  |
| C  | -9.57326  | -0.57847 | 0.44175  |
| S  | -1.91384  | 0.46696  | -1.63718 |
| S  | -4.85226  | 1.12512  | -1.27598 |
| S  | -8.10306  | 0.61404  | -1.44794 |
| C  | -3.33969  | 0.48633  | -0.58477 |
| C  | -9.54058  | -0.24728 | -0.86383 |
| S  | 1.04383   | -1.51676 | -0.44059 |
| S  | 3.97033   | -1.49774 | 0.34566  |
| S  | 7.25618   | -1.38811 | -0.04005 |
| C  | 2.45435   | -0.59465 | 0.10699  |
| C  | 4.93717   | -0.0226  | 0.58313  |
| C  | 6.27291   | 0.01415  | 0.42246  |
| C  | 8.67991   | -0.41477 | -0.5125  |
| S  | 1.04161   | 1.77611  | 0.4      |
| S  | 3.96851   | 1.38238  | 1.08881  |
| S  | 7.23959   | 1.48436  | 0.70279  |
| C  | 2.45244   | 0.70764  | 0.44159  |
| C  | 8.65996   | 0.89511  | -0.18322 |
| S  | 9.98368   | -1.2455  | -1.36381 |
| S  | -10.88769 | -1.45147 | 1.24992  |
| Ge | -0.44641  | 0.10536  | 0.03046  |

|   |           |          |          |
|---|-----------|----------|----------|
| S | 9.871     | 2.14274  | -0.49688 |
| S | -10.77007 | -0.50911 | -2.10694 |
| H | -11.69567 | -0.96772 | -1.23518 |
| H | -11.47742 | -0.38    | 1.83293  |
| H | 10.77394  | 1.29032  | -1.0282  |
| C | 11.01483  | -1.76564 | 0.05771  |
| O | 12.02964  | -2.37038 | -0.08328 |
| H | 10.57894  | -1.44327 | 1.02185  |

**T17: symmetry c1 -9134.5248035**

0 1

|   |          |          |          |
|---|----------|----------|----------|
| S | 0.65916  | 1.73731  | -0.11457 |
| S | 3.59485  | 1.47801  | 0.59543  |
| S | 6.8666   | 1.40887  | 0.12818  |
| C | 2.05464  | 0.68797  | 0.17594  |
| C | 4.53219  | -0.02919 | 0.46187  |
| C | 5.86407  | -0.05692 | 0.27611  |
| C | 8.31194  | 0.56462  | -0.45911 |
| S | 0.59521  | -1.66137 | -0.07352 |
| S | 3.53819  | -1.49652 | 0.62681  |
| S | 6.80939  | -1.56297 | 0.15882  |
| C | 2.03009  | -0.65634 | 0.19022  |
| C | 8.28588  | -0.7873  | -0.44514 |
| S | -2.34414 | 0.00215  | -1.71753 |
| S | -5.26846 | 0.77893  | -1.513   |
| S | -8.52632 | 0.29007  | -1.51983 |



|    |           |          |          |
|----|-----------|----------|----------|
| C  | -3.75643  | 0.31469  | -0.69332 |
| C  | -6.23871  | 0.62623  | -0.02726 |
| C  | -7.56943  | 0.42418  | -0.02398 |
| C  | -9.97137  | -0.3609  | -0.7214  |
| S  | -2.34915  | 0.01931  | 1.68044  |
| S  | -5.27386  | 0.79669  | 1.4594   |
| S  | -8.54876  | 0.30906  | 1.45027  |
| C  | -3.75789  | 0.32369  | 0.65138  |
| C  | -9.99254  | -0.34357 | 0.62564  |
| S  | -11.22202 | -0.90792 | -1.8449  |
| H  | -12.14307 | -1.10939 | -0.87631 |
| S  | 9.62884   | 1.58795  | -1.05738 |
| Ge | -0.86207  | 0.05688  | -0.02566 |
| S  | -11.31057 | -0.95297 | 1.6426   |
| H  | -11.87227 | 0.24391  | 1.93856  |
| S  | 9.56252   | -1.87302 | -1.02029 |
| C  | 10.48618  | -2.14682 | 0.52983  |
| O  | 11.43905  | -2.85725 | 0.57626  |
| H  | 10.06024  | -1.5826  | 1.38059  |
| C  | 10.55989  | 1.86542  | 0.48766  |
| O  | 11.53763  | 2.54211  | 0.51896  |
| H  | 10.11312  | 1.33741  | 1.35089  |

**T18: symmetry c1            -9134.5274149**

0 1

|   |          |          |          |
|---|----------|----------|----------|
| S | -1.48174 | 1.77815  | -0.35525 |
| S | -4.39549 | 1.38429  | -1.09852 |
| S | -7.6716  | 1.48577  | -0.757   |
| C | -2.89095 | 0.70877  | -0.42573 |
| C | -5.37163 | -0.02236 | -0.61189 |
| C | -6.70946 | 0.0141   | -0.46951 |
| C | -9.10692 | 0.89135  | 0.10096  |
| S | -1.49627 | -1.51751 | 0.47397  |
| S | -4.40806 | -1.4984  | -0.3659  |
| S | -7.69887 | -1.39011 | -0.02701 |
| C | -2.89768 | -0.59472 | -0.09577 |
| C | -9.13161 | -0.41999 | 0.42402  |
| S | 1.43432  | 0.46887  | 1.73306  |
| S | 4.38172  | 1.11091  | 1.43609  |
| S | 7.63991  | 0.66642  | 1.6514   |
| C | 2.88122  | 0.48399  | 0.71009  |
| C | 5.3894   | 0.58696  | 0.06539  |
| C | 6.71996  | 0.40232  | 0.14872  |
| C | 9.0657   | -0.24156 | 1.1107   |
| S | 1.53451  | -0.38628 | -1.55501 |
| S | 4.46969  | 0.36524  | -1.442   |
| S | 7.74231  | -0.07881 | -1.21876 |
| C | 2.92018  | 0.14787  | -0.59121 |
| C | 9.12483  | -0.57216 | -0.19765 |
| S | 10.22885 | -0.57256 | 2.39873  |
| H | 11.15184 | -1.11831 | 1.5775   |

|    |           |          |          |
|----|-----------|----------|----------|
| S  | -10.32442 | 2.13658  | 0.39851  |
| H  | -11.23488 | 1.2812   | 0.91202  |
| Ge | -0.001    | 0.10804  | 0.03629  |
| S  | 10.44233  | -1.44464 | -0.98355 |
| S  | -10.44966 | -1.25572 | 1.24798  |
| C  | 11.51167  | -0.03978 | -1.47147 |
| O  | 12.5432   | -0.19749 | -2.04272 |
| H  | 11.08049  | 0.93146  | -1.1645  |
| C  | -11.45473 | -1.77015 | -0.19451 |
| O  | -12.47115 | -2.37653 | -0.07447 |
| H  | -11.00197 | -1.44271 | -1.14909 |

**T19: symmetry c1      -9247.837081**

0 1

|   |         |          |          |
|---|---------|----------|----------|
| S | 1.05919 | 1.50752  | -0.87722 |
| S | 4.01202 | 1.68593  | -0.21752 |
| S | 7.27502 | 1.45953  | -0.704   |
| C | 2.49429 | 0.75582  | -0.15894 |
| C | 4.99616 | 0.31792  | 0.35694  |
| C | 6.32354 | 0.22612  | 0.1578   |
| C | 8.69886 | 0.42571  | -0.92552 |
| S | 1.109   | -1.45299 | 0.79231  |
| S | 4.05549 | -0.90231 | 1.24843  |
| S | 7.31455 | -1.13232 | 0.74292  |
| C | 2.51313 | -0.4142  | 0.50333  |

|    |           |          |          |
|----|-----------|----------|----------|
| C  | 8.72495   | -0.74977 | -0.26325 |
| S  | -1.8679   | 0.96529  | 1.51212  |
| S  | -4.7917   | 0.19637  | 1.75025  |
| S  | -8.06671  | 0.53743  | 1.59791  |
| C  | -3.28885  | 0.19012  | 0.7945   |
| C  | -5.77803  | -0.42487 | 0.40498  |
| C  | -7.11517  | -0.28731 | 0.33758  |
| C  | -9.50393  | 0.7513   | 0.5788   |
| S  | -1.90872  | -0.73113 | -1.43202 |
| S  | -4.82673  | -1.28387 | -0.82989 |
| S  | -8.11445  | -0.93964 | -0.9749  |
| C  | -3.30585  | -0.47972 | -0.37128 |
| C  | -9.53804  | 0.07057  | -0.58741 |
| S  | -10.71102 | 1.84078  | 1.2698   |
| H  | -11.62499 | 1.6225   | 0.29958  |
| S  | 9.95453   | 1.05188  | -2.00459 |
| Ge | -0.40094  | 0.06049  | 0.04116  |
| S  | -10.86052 | 0.08914  | -1.75601 |
| S  | 10.02029  | -1.95566 | -0.29992 |
| C  | 11.13618  | 1.75798  | -0.82452 |
| O  | 11.07102  | 1.69353  | 0.36585  |
| H  | 11.94669  | 2.25952  | -1.38234 |
| C  | 11.04996  | -1.38404 | 1.10994  |
| O  | 12.02386  | -1.98192 | 1.43937  |
| H  | 10.66571  | -0.45574 | 1.5621   |
| C  | -11.87256 | -1.29799 | -1.11796 |

|   |           |          |          |
|---|-----------|----------|----------|
| O | -12.89271 | -1.62715 | -1.63388 |
| H | -11.42013 | -1.75875 | -0.21998 |

**T20: symmetry c1        -9361.1371729**

0 1

|   |          |          |          |
|---|----------|----------|----------|
| S | 1.49063  | -1.46211 | -0.84655 |
| S | 4.42705  | -0.87561 | -1.3207  |
| S | 7.69937  | -1.12571 | -0.93103 |
| C | 2.90202  | -0.44923 | -0.50581 |
| C | 5.38869  | 0.27518  | -0.36142 |
| C | 6.72103  | 0.17512  | -0.2061  |
| C | 9.16209  | -0.78128 | 0.01129  |
| S | 1.48051  | 1.35501  | 1.0551   |
| S | 4.41768  | 1.58767  | 0.34832  |
| S | 7.69078  | 1.33346  | 0.73877  |
| C | 2.89876  | 0.66407  | 0.2483   |
| C | 9.15826  | 0.33741  | 0.77092  |
| S | -1.48836 | -0.90883 | 1.47754  |
| S | -4.42712 | -1.37003 | 0.90098  |
| S | -7.69645 | -0.96704 | 1.17141  |
| C | -2.90292 | -0.55644 | 0.47028  |
| C | -5.39125 | -0.40313 | -0.24137 |
| C | -6.72238 | -0.24301 | -0.13305 |
| C | -9.15596 | -0.01519 | 0.83944  |
| S | -1.48474 | 1.0128   | -1.32677 |

|    |           |          |          |
|----|-----------|----------|----------|
| S  | -4.42438  | 0.30776  | -1.55616 |
| S  | -7.69459  | 0.70917  | -1.28324 |
| C  | -2.90073  | 0.20195  | -0.64007 |
| C  | -9.15516  | 0.74741  | -0.27723 |
| S  | -10.45325 | -0.12493 | 2.04107  |
| S  | 10.46682  | -1.97447 | -0.10276 |
| Ge | -0.00064  | -0.00893 | 0.04721  |
| S  | -10.44963 | 1.83106  | -0.81526 |
| S  | 10.45568  | 0.88741  | 1.84497  |
| C  | -11.38653 | -1.55205 | 1.38878  |
| O  | -12.35407 | -1.97356 | 1.93705  |
| H  | -10.95069 | -1.94919 | 0.45292  |
| C  | -11.37574 | 0.71553  | -1.92455 |
| O  | -12.33801 | 1.08007  | -2.52095 |
| H  | -10.94179 | -0.30131 | -1.9599  |
| C  | 11.38405  | -1.32294 | -1.5406  |
| O  | 12.35171  | -1.86687 | -1.96745 |
| H  | 10.93882  | -0.39188 | -1.93861 |
| C  | 11.36945  | 1.99653  | 0.71912  |
| O  | 12.33069  | 2.59958  | 1.07531  |
| H  | 10.92934  | 2.025    | -0.29529 |

**T21 : symmetry c1 -9112.3876197**

0 1

|   |          |         |          |
|---|----------|---------|----------|
| S | -2.14648 | 0.96762 | -1.41738 |
| S | -5.05356 | 0.16123 | -1.72586 |

|    |           |          |          |
|----|-----------|----------|----------|
| S  | -8.33983  | 0.51628  | -1.51738 |
| C  | -3.55836  | 0.12297  | -0.75828 |
| C  | -6.03752  | -0.53974 | -0.418   |
| C  | -7.37266  | -0.38901 | -0.33802 |
| C  | -9.80058  | 0.59092  | -0.49155 |
| S  | -2.17644  | -0.90185 | 1.41986  |
| S  | -5.07951  | -1.48033 | 0.75221  |
| S  | -8.34822  | -1.12582 | 0.95677  |
| C  | -3.56922  | -0.61848 | 0.36347  |
| C  | -9.79329  | -0.1467  | 0.63591  |
| S  | 0.88507   | -1.31329 | -0.9608  |
| S  | 3.8102    | -1.43288 | -0.17604 |
| S  | 7.09732   | -1.08887 | -0.41367 |
| C  | 2.25356   | -0.56983 | -0.11945 |
| C  | 4.71116   | -0.08426 | 0.55504  |
| C  | 6.04598   | 0.04752  | 0.44371  |
| C  | 8.45965   | 0.07078  | -0.56991 |
| S  | 0.73984   | 1.5118   | 0.92465  |
| S  | 3.68163   | 1.03849  | 1.4754   |
| S  | 6.94263   | 1.39303  | 1.19587  |
| C  | 2.19648   | 0.5489   | 0.62399  |
| C  | 8.37228   | 1.20448  | 0.18986  |
| S  | 9.78798   | -0.35113 | -1.57579 |
| S  | -11.11683 | 1.65605  | -1.01662 |
| Ge | -0.67555  | 0.0227   | -0.00059 |
| S  | 9.52942   | 2.51552  | 0.33303  |

|   |           |          |          |
|---|-----------|----------|----------|
| S | -11.06184 | -0.32613 | 1.85408  |
| H | -11.97686 | 0.37448  | 1.14787  |
| H | -11.66149 | 0.82262  | -1.93566 |
| H | 10.47472  | 1.89818  | -0.41074 |
| N | 10.9497   | -1.27352 | -0.27777 |
| O | 10.59446  | -1.27911 | 0.86981  |
| O | 11.93886  | -1.74188 | -0.77884 |

**T22: symmetry c1            -9316.8550138**

0 1

|   |          |          |          |
|---|----------|----------|----------|
| S | -0.20054 | -1.65338 | -0.24308 |
| S | -3.15162 | -1.5103  | 0.42541  |
| S | -6.41501 | -1.5504  | -0.08803 |
| C | -1.63708 | -0.65646 | 0.04045  |
| C | -4.14079 | -0.03513 | 0.31039  |
| C | -5.46988 | -0.05216 | 0.10806  |
| C | -7.89067 | -0.75495 | -0.63326 |
| S | -0.25805 | 1.74427  | -0.14881 |
| S | -3.20245 | 1.46349  | 0.51395  |
| S | -6.46637 | 1.42176  | 0.00373  |
| C | -1.65903 | 0.6874   | 0.08014  |
| C | -7.91438 | 0.61099  | -0.59079 |
| S | 2.71887  | -0.05106 | 1.62428  |
| S | 5.64565  | 0.73739  | 1.47972  |
| S | 8.90418  | 0.24906  | 1.5124   |
| C | 4.14337  | 0.29398  | 0.63027  |



|    |           |          |          |
|----|-----------|----------|----------|
| C  | 6.63426   | 0.62432  | 0.00261  |
| C  | 7.96496   | 0.42214  | 0.00943  |
| C  | 10.35954  | -0.37879 | 0.71435  |
| S  | 2.76742   | 0.06695  | -1.7712  |
| S  | 5.68774   | 0.83464  | -1.49086 |
| S  | 8.96151   | 0.34568  | -1.45573 |
| C  | 4.16347   | 0.33904  | -0.71359 |
| C  | 10.39666  | -0.32607 | -0.63143 |
| S  | 11.59769  | -0.95355 | 1.83784  |
| H  | 12.53082  | -1.12709 | 0.87544  |
| S  | -9.18317  | -1.77317 | -1.21944 |
| Ge | 1.25952   | 0.05793  | -0.10204 |
| S  | 11.72763  | -0.90661 | -1.64839 |
| H  | 12.29048  | 0.29854  | -1.90636 |
| S  | -9.24267  | 1.61766  | -1.11318 |
| N  | -10.14062 | 1.92505  | 0.57144  |
| O  | -9.68194  | 1.41464  | 1.55468  |
| O  | -11.10685 | 2.63031  | 0.44534  |
| N  | -10.07627 | -2.20626 | 0.43932  |
| O  | -9.63948  | -1.73675 | 1.4525   |
| O  | -11.01713 | -2.93587 | 0.26789  |

**T23: symmetry c1            -9316.8630288**

0 1

|   |         |          |          |
|---|---------|----------|----------|
| S | 1.46768 | -1.72691 | -0.57862 |
| S | 4.39213 | -1.26854 | -1.23445 |

|   |           |          |          |
|---|-----------|----------|----------|
| S | 7.66092   | -1.45015 | -0.89036 |
| C | 2.88827   | -0.67421 | -0.48815 |
| C | 5.37853   | 0.04936  | -0.55774 |
| C | 6.71615   | -0.0124  | -0.42176 |
| C | 9.08054   | -1.01395 | 0.05094  |
| S | 1.50858   | 1.42458  | 0.69547  |
| S | 4.42844   | 1.48551  | -0.10976 |
| S | 7.72313   | 1.30709  | 0.19152  |
| C | 2.90573   | 0.57176  | 0.01678  |
| C | 9.12602   | 0.2513   | 0.56768  |
| S | -1.43546  | -0.69322 | 1.67474  |
| S | -4.39076  | -1.24971 | 1.30321  |
| S | -7.6385   | -0.80479 | 1.58792  |
| C | -2.88402  | -0.54827 | 0.66457  |
| C | -5.39514  | -0.53677 | 0.0183   |
| C | -6.72535  | -0.35997 | 0.12242  |
| C | -9.04143  | 0.18137  | 1.19942  |
| S | -1.53047  | 0.60441  | -1.46606 |
| S | -4.47569  | -0.1124  | -1.44465 |
| S | -7.75387  | 0.28907  | -1.16286 |
| C | -2.92145  | -0.03766 | -0.57863 |
| C | -9.11065  | 0.70415  | -0.06224 |
| S | -10.19987 | 0.32946  | 2.50866  |
| H | -11.12417 | 0.96561  | 1.75437  |
| S | 10.28386  | -2.28534 | 0.16716  |
| H | 11.20233  | -1.50001 | 0.77354  |

|    |           |          |          |
|----|-----------|----------|----------|
| Ge | 0.00131   | -0.11436 | 0.04042  |
| S  | -10.41509 | 1.63629  | -0.6818  |
| S  | 10.43841  | 0.91532  | 1.45698  |
| N  | -11.60975 | 0.20509  | -1.32363 |
| O  | -11.28057 | -0.92738 | -1.09514 |
| O  | -12.58873 | 0.62334  | -1.88503 |
| N  | 11.56752  | 1.58826  | -0.01286 |
| O  | 11.21081  | 1.34449  | -1.13373 |
| O  | 12.54064  | 2.18227  | 0.37279  |

**T24 : symmetry c1      -9521.3302842**

0 1

|   |          |          |          |
|---|----------|----------|----------|
| S | -0.89472 | -1.55163 | -0.59677 |
| S | -3.82904 | -1.52069 | 0.16159  |
| S | -7.09656 | -1.42705 | -0.30457 |
| C | -2.31116 | -0.62206 | -0.085   |
| C | -4.80077 | -0.04166 | 0.35198  |
| C | -6.13215 | -0.00506 | 0.16779  |
| C | -8.56638 | -0.52551 | -0.67204 |
| S | -0.90703 | 1.76005  | 0.17199  |
| S | -3.84006 | 1.3785   | 0.83014  |
| S | -7.11219 | 1.46995  | 0.36521  |
| C | -2.31705 | 0.68817  | 0.21725  |
| C | -8.5737  | 0.80597  | -0.36396 |
| S | 2.05614  | 0.5546   | -1.79721 |
| S | 4.98561  | -0.22051 | -1.78136 |

|    |           |          |          |
|----|-----------|----------|----------|
| S  | 8.25137   | 0.17704  | -1.72611 |
| C  | 3.47873   | 0.04515  | -0.87145 |
| C  | 5.96818   | -0.41213 | -0.30948 |
| C  | 7.30516   | -0.26012 | -0.27935 |
| C  | 9.67656   | 0.68606  | -0.83148 |
| S  | 2.08803   | -0.18841 | 1.51824  |
| S  | 5.01533   | -0.86917 | 1.1222   |
| S  | 8.30932   | -0.50966 | 1.15605  |
| C  | 3.49106   | -0.25166 | 0.44002  |
| C  | 9.72006   | 0.38774  | 0.50226  |
| S  | 10.888    | 1.49448  | -1.80986 |
| H  | 11.8083   | 1.53124  | -0.82004 |
| S  | -9.87313  | -1.39471 | -1.43854 |
| Ge | 0.58664   | 0.10595  | -0.15171 |
| S  | 11.03695  | 0.72592  | 1.55401  |
| S  | -9.89248  | 1.91012  | -0.66776 |
| N  | 12.14599  | -0.88012 | 1.27213  |
| O  | 11.77904  | -1.65919 | 0.43469  |
| O  | 13.11861  | -0.91264 | 1.98013  |
| N  | -10.75002 | -2.15819 | 0.10671  |
| O  | -10.29571 | -1.91384 | 1.18906  |
| O  | -11.69963 | -2.8296  | -0.20004 |
| N  | -10.7879  | 1.87494  | 1.0454   |
| O  | -10.33754 | 1.16541  | 1.90067  |
| O  | -11.7444  | 2.60377  | 1.0692   |

**T25: symmetry c1            -9725.8030333**

0 1

|   |          |          |          |
|---|----------|----------|----------|
| S | -1.54262 | -1.48431 | -1.1543  |
| S | -4.44757 | -1.78054 | -0.34489 |
| S | -7.74246 | -1.5111  | -0.47905 |
| C | -2.91315 | -0.88853 | -0.20531 |
| C | -5.36789 | -0.56601 | 0.57363  |
| C | -6.70771 | -0.46071 | 0.51978  |
| C | -9.11783 | -0.40025 | -0.47686 |
| S | -1.43196 | 1.08187  | 1.07365  |
| S | -4.3501  | 0.46838  | 1.60229  |
| S | -7.64784 | 0.7301   | 1.45192  |
| C | -2.87017 | 0.12741  | 0.6742   |
| C | -9.07143 | 0.63467  | 0.41243  |
| S | 1.42005  | 0.91452  | -1.36603 |
| S | 4.34799  | 0.26664  | -1.78973 |
| S | 7.6383   | 0.59108  | -1.66486 |
| C | 2.86665  | 0.04418  | -0.82819 |
| C | 5.3719   | -0.59522 | -0.61725 |
| C | 6.70983  | -0.46492 | -0.57187 |
| C | 9.06054  | 0.66567  | -0.61749 |
| S | 1.54894  | -1.30119 | 1.21068  |
| S | 4.46074  | -1.67699 | 0.46142  |
| S | 7.75315  | -1.34159 | 0.57426  |
| C | 2.91681  | -0.83333 | 0.18911  |
| C | 9.11108  | -0.22475 | 0.41621  |
| S | 10.29722 | 1.81659  | -1.04022 |

|    |           |          |          |
|----|-----------|----------|----------|
| S  | -10.43546 | -0.76734 | -1.55453 |
| Ge | -0.00097  | -0.23975 | -0.05553 |
| S  | 10.48237  | -0.45204 | 1.4671   |
| S  | -10.37897 | 1.7465   | 0.71344  |
| N  | -9.724    | 3.29572  | -0.22754 |
| O  | -10.44241 | 4.2513   | -0.09295 |
| O  | -8.70659  | 3.18218  | -0.85492 |
| N  | -11.70339 | -1.54303 | -0.31999 |
| O  | -11.44851 | -1.50012 | 0.85326  |
| O  | -12.66535 | -1.99585 | -0.88131 |
| N  | 9.84873   | 0.45616  | 3.04462  |
| O  | 10.61523  | 0.36142  | 3.96703  |
| O  | 8.79568   | 1.02894  | 2.97683  |
| N  | 11.59383  | 0.65704  | -1.88117 |
| O  | 11.40566  | -0.5286  | -1.83472 |
| O  | 12.50183  | 1.27225  | -2.37369 |

**T26: symmetry c1      -8963.2455633**

0 1

|   |          |         |          |
|---|----------|---------|----------|
| S | -1.78283 | 1.37248 | 1.07425  |
| S | -4.70346 | 1.61538 | 0.28998  |
| S | -7.9792  | 1.24418 | 0.59912  |
| C | -3.16386 | 0.72616 | 0.1744   |
| C | -5.62799 | 0.32905 | -0.52231 |
| C | -6.95927 | 0.18184 | -0.38981 |
| C | -9.39369 | 0.15311 | 0.5844   |

|    |           |          |          |
|----|-----------|----------|----------|
| S  | -1.68635  | -1.29309 | -1.03014 |
| S  | -4.61837  | -0.71903 | -1.5488  |
| S  | -7.87734  | -1.08826 | -1.23606 |
| C  | -3.12633  | -0.33023 | -0.65665 |
| C  | -9.3364   | -0.91002 | -0.24134 |
| S  | 1.21981   | -0.97088 | 1.33042  |
| S  | 4.1445    | -0.24963 | 1.6684   |
| S  | 7.44107   | -0.55872 | 1.46104  |
| C  | 2.64125   | -0.10123 | 0.7257   |
| C  | 5.13187   | 0.55149  | 0.42166  |
| C  | 6.46922   | 0.42121  | 0.3421   |
| C  | 8.8083    | -0.72619 | 0.32297  |
| S  | 1.26068   | 1.11607  | -1.35178 |
| S  | 4.18059   | 1.58168  | -0.67592 |
| S  | 7.47346   | 1.26091  | -0.86281 |
| C  | 2.65655   | 0.72589  | -0.33399 |
| C  | 8.82012   | 0.10742  | -0.73473 |
| S  | 10.00188  | -1.95202 | 0.76601  |
| S  | -10.73348 | 0.53352  | 1.68143  |
| Ge | -0.24634  | 0.09936  | -0.00041 |
| S  | 10.06772  | 0.24441  | -1.98069 |
| S  | -10.551   | -2.16315 | -0.5241  |
| H  | -11.49582 | -1.55632 | 0.22814  |
| H  | -11.31738 | 1.49068  | 0.92077  |
| H  | 11.09479  | 0.1358   | -1.10314 |
| N  | 11.48209  | -1.03098 | 0.75284  |

|   |          |          |         |
|---|----------|----------|---------|
| H | 11.78557 | -0.81309 | 1.69623 |
| H | 12.19932 | -1.57207 | 0.28137 |

**T27: symmetry c1      -9018.5789986**

0 1

|   |          |          |          |
|---|----------|----------|----------|
| S | 1.05323  | 1.69016  | -0.37845 |
| S | 3.97347  | 1.63948  | 0.45189  |
| S | 7.23028  | 1.49859  | -0.10004 |
| C | 2.45562  | 0.75186  | 0.1597   |
| C | 4.93311  | 0.14526  | 0.59882  |
| C | 6.2584   | 0.09048  | 0.36645  |
| C | 8.69282  | 0.55132  | -0.48222 |
| S | 1.03244  | -1.62444 | 0.36202  |
| S | 3.95513  | -1.25954 | 1.09721  |
| S | 7.18924  | -1.4265  | 0.53833  |
| C | 2.44819  | -0.56109 | 0.45052  |
| C | 8.66029  | -0.76099 | -0.18646 |
| S | -1.90137 | -0.38258 | -1.62937 |
| S | -4.82695 | 0.41357  | -1.6433  |
| S | -8.09295 | -0.01692 | -1.61859 |
| C | -3.33106 | 0.13256  | -0.71803 |
| C | -5.82526 | 0.58473  | -0.17858 |
| C | -7.15949 | 0.40869  | -0.16251 |
| C | -9.5576  | -0.48178 | -0.73071 |
| S | -1.96773 | 0.3351   | 1.69005  |
| S | -4.88549 | 1.04643  | 1.26112  |



|    |           |          |          |
|----|-----------|----------|----------|
| S  | -8.16832  | 0.61724  | 1.28199  |
| C  | -3.35652  | 0.41938  | 0.59547  |
| C  | -9.60273  | -0.18577 | 0.58294  |
| S  | -10.79345 | -1.243   | -1.74044 |
| H  | -11.7367  | -1.22534 | -0.77265 |
| S  | 10.07076  | 1.34649  | -1.24797 |
| Ge | -0.44305  | 0.04234  | 0.03562  |
| S  | -10.94596 | -0.56229 | 1.67719  |
| H  | -11.49808 | 0.67455  | 1.70981  |
| S  | 10.01952  | -1.87987 | -0.45421 |
| N  | 9.34984   | -3.28998 | 0.26558  |
| H  | 9.24539   | -4.04638 | -0.39814 |
| H  | 9.85965   | -3.58461 | 1.08843  |
| N  | 10.79158  | 2.17815  | 0.08858  |
| H  | 11.70265  | 1.79875  | 0.31448  |
| H  | 10.85033  | 3.17233  | -0.09192 |

**T28: symmetry c1            -9018.5808153**

0 1

|   |         |          |          |
|---|---------|----------|----------|
| S | 1.41041 | -0.11974 | -1.71612 |
| S | 4.35149 | 0.6119   | -1.67061 |
| S | 7.63925 | 0.19019  | -1.69027 |
| C | 2.85104 | 0.28885  | -0.76782 |
| C | 5.3562  | 0.64903  | -0.20101 |
| C | 6.69108 | 0.47648  | -0.2121  |
| C | 9.00503 | -0.55019 | -0.82611 |

|    |           |          |          |
|----|-----------|----------|----------|
| S  | 1.49723   | 0.30311  | 1.65497  |
| S  | 4.42734   | 0.98938  | 1.27956  |
| S  | 7.71639   | 0.56912  | 1.23607  |
| C  | 2.88445   | 0.45909  | 0.56528  |
| C  | 9.04311   | -0.38154 | 0.50954  |
| S  | -1.53795  | 1.82545  | -0.26463 |
| S  | -4.44913  | 1.69499  | 0.58644  |
| S  | -7.71567  | 1.60304  | 0.09566  |
| C  | -2.93396  | 0.83992  | 0.19988  |
| C  | -5.40626  | 0.1929   | 0.62064  |
| C  | -6.73704  | 0.15719  | 0.41903  |
| C  | -9.18466  | 0.68905  | -0.33431 |
| S  | -1.50636  | -1.54179 | 0.17626  |
| S  | -4.42104  | -1.25134 | 0.96788  |
| S  | -7.66839  | -1.36739 | 0.48375  |
| C  | -2.92224  | -0.49372 | 0.37221  |
| C  | -9.1498   | -0.64248 | -0.16321 |
| S  | -10.5684  | 1.5691   | -1.00979 |
| H  | -11.10144 | 1.9883   | 0.16296  |
| S  | 10.20495  | -1.36166 | -1.84096 |
| H  | 11.26458  | -0.82884 | -1.18525 |
| Ge | -0.03404  | 0.15118  | -0.00977 |
| S  | -10.51906 | -1.7287  | -0.50024 |
| S  | 10.27007  | -0.94359 | 1.65067  |
| N  | 11.73417  | -0.3261  | 0.93332  |
| H  | 12.0661   | 0.49511  | 1.4283   |

|   |           |          |          |
|---|-----------|----------|----------|
| H | 12.44352  | -1.05092 | 0.96295  |
| N | -9.82281  | -3.20811 | 0.02873  |
| H | -10.31231 | -3.60242 | 0.82163  |
| H | -9.73039  | -3.87992 | -0.72225 |

**T29: symmetry c1            -9073.9124224**

0 1

|   |          |          |          |
|---|----------|----------|----------|
| S | -1.31945 | -1.73646 | -0.36171 |
| S | -4.22983 | -1.62652 | 0.49711  |
| S | -7.49331 | -1.47404 | -0.01226 |
| C | -2.70698 | -0.76527 | 0.15604  |
| C | -5.17337 | -0.11867 | 0.60308  |
| C | -6.50132 | -0.05942 | 0.3878   |
| C | -8.95191 | -0.52672 | -0.40914 |
| S | -1.25793 | 1.60146  | 0.25886  |
| S | -4.17588 | 1.29378  | 1.03685  |
| S | -7.41521 | 1.4722   | 0.51651  |
| C | -2.6834  | 0.55714  | 0.39931  |
| C | -8.90263 | 0.79521  | -0.16262 |
| S | 1.64903  | 0.25671  | -1.70365 |
| S | 4.57915  | -0.51896 | -1.69836 |
| S | 7.8732   | -0.14994 | -1.69688 |
| C | 3.08308  | -0.22307 | -0.77918 |
| C | 5.58247  | -0.65152 | -0.23336 |
| C | 6.91996  | -0.50014 | -0.23579 |
| C | 9.24829  | 0.5249   | -0.79447 |

|    |           |          |          |
|----|-----------|----------|----------|
| S  | 1.72771   | -0.34828 | 1.63934  |
| S  | 4.64773   | -1.05591 | 1.22714  |
| S  | 7.9434    | -0.68601 | 1.20488  |
| C  | 3.11319   | -0.4653  | 0.54284  |
| C  | 9.28333   | 0.28421  | 0.53016  |
| S  | 10.45943  | 1.37353  | -1.7646  |
| H  | 11.51167  | 0.79387  | -1.13715 |
| S  | -10.34841 | -1.33583 | -1.12505 |
| Ge | 0.19849   | -0.09234 | -0.01584 |
| S  | 10.51639  | 0.76844  | 1.70006  |
| S  | -10.25512 | 1.91692  | -0.45206 |
| N  | -9.56011  | 3.34693  | 0.20125  |
| H  | -9.45811  | 4.0755   | -0.49326 |
| H  | -10.05392 | 3.67923  | 1.01948  |
| N  | -11.05948 | -2.10761 | 0.25217  |
| H  | -11.96392 | -1.71063 | 0.47451  |
| H  | -11.13027 | -3.10737 | 0.11114  |
| N  | 11.97355  | 0.17339  | 0.95033  |
| H  | 12.6913   | 0.88718  | 1.01906  |
| H  | 12.29551  | -0.67724 | 1.40015  |

**T30: symmetry c1            -9129.241849**

0 1

|   |         |         |          |
|---|---------|---------|----------|
| S | 1.55805 | 1.67146 | -0.59532 |
| S | 4.47811 | 1.69307 | 0.23721  |
| S | 7.73556 | 1.44812 | -0.28292 |

|    |           |          |          |
|----|-----------|----------|----------|
| C  | 2.95016   | 0.79278  | 0.05767  |
| C  | 5.42124   | 0.21969  | 0.57519  |
| C  | 6.74656   | 0.12236  | 0.35773  |
| C  | 9.18655   | 0.44189  | -0.53793 |
| S  | 1.5014    | -1.52373 | 0.5547   |
| S  | 4.42731   | -1.10125 | 1.24267  |
| S  | 7.6605    | -1.36898 | 0.72912  |
| C  | 2.9282    | -0.47298 | 0.51116  |
| C  | 9.13874   | -0.82068 | -0.07502 |
| S  | -1.41113  | -0.50901 | -1.59404 |
| S  | -4.34017  | 0.2693   | -1.70734 |
| S  | -7.61206  | -0.20721 | -1.6163  |
| C  | -2.84357  | 0.11099  | -0.75424 |
| C  | -5.34156  | 0.60238  | -0.27181 |
| C  | -6.67343  | 0.41298  | -0.23423 |
| C  | -9.03165  | -0.64674 | -0.64496 |
| S  | -1.48372  | 0.61139  | 1.61234  |
| S  | -4.40596  | 1.2484   | 1.09924  |
| S  | -7.69501  | 0.78934  | 1.16864  |
| C  | -2.87184  | 0.55601  | 0.51418  |
| C  | -9.06902  | -0.20793 | 0.62919  |
| S  | -10.20719 | -1.64118 | -1.53174 |
| S  | 10.57392  | 1.11423  | -1.39863 |
| Ge | 0.04197   | 0.10302  | 0.01449  |
| S  | -10.39952 | -0.49121 | 1.76067  |
| S  | 10.48343  | -1.98197 | -0.19599 |

|   |           |          |          |
|---|-----------|----------|----------|
| N | 9.80635   | -3.26967 | 0.71931  |
| H | 9.69109   | -4.11147 | 0.17013  |
| H | 10.31772  | -3.44925 | 1.57372  |
| N | 11.30132  | 2.10831  | -0.18192 |
| H | 12.20676  | 1.75127  | 0.09682  |
| H | 11.37336  | 3.06852  | -0.49375 |
| N | -11.35744 | 0.91466  | 1.46964  |
| H | -12.14752 | 0.70509  | 0.87171  |
| H | -11.62777 | 1.36096  | 2.33607  |
| N | -11.71511 | -0.84465 | -1.23478 |
| H | -12.10021 | -0.48504 | -2.10097 |
| H | -12.36082 | -1.49427 | -0.80144 |

**T31: symmetry c1      -9041.8279617**

0 1

|   |          |          |          |
|---|----------|----------|----------|
| S | -2.28646 | 0.98169  | 1.4245   |
| S | -5.22377 | 1.4218   | 0.80583  |
| S | -8.48716 | 0.91231  | 1.0244   |
| C | -3.67641 | 0.64777  | 0.37991  |
| C | -6.14912 | 0.45967  | -0.37205 |
| C | -7.47558 | 0.25314  | -0.27522 |
| C | -9.88887 | -0.13813 | 0.67335  |
| S | -2.20036 | -0.83605 | -1.44561 |
| S | -5.148   | -0.17248 | -1.70231 |
| S | -8.396   | -0.68383 | -1.4781  |
| C | -3.64301 | -0.0736  | -0.75425 |

|    |           |          |          |
|----|-----------|----------|----------|
| C  | -9.83608  | -0.86916 | -0.45723 |
| S  | 0.72986   | -1.29259 | 0.85993  |
| S  | 3.65029   | -0.69327 | 1.40682  |
| S  | 6.94653   | -0.87553 | 1.10544  |
| C  | 2.13899   | -0.25607 | 0.57338  |
| C  | 4.6212    | 0.4903   | 0.49708  |
| C  | 5.95974   | 0.41063  | 0.37899  |
| C  | 8.31208   | -0.63249 | -0.02372 |
| S  | 0.73122   | 1.56868  | -0.97326 |
| S  | 3.65196   | 1.81523  | -0.19305 |
| S  | 6.94821   | 1.61963  | -0.47444 |
| C  | 2.13878   | 0.87704  | -0.1501  |
| C  | 8.30959   | 0.50924  | -0.74195 |
| S  | 9.53508   | -1.901   | -0.01811 |
| S  | -11.21024 | -0.16379 | 1.85506  |
| Ge | -0.75645  | 0.14803  | -0.025   |
| S  | 9.56196   | 1.06845  | -1.85252 |
| S  | -11.0416  | -1.98069 | -1.11819 |
| H  | -11.98066 | -1.66669 | -0.19826 |
| H  | -11.81715 | 0.98314  | 1.46526  |
| H  | 10.56058  | 0.50595  | -1.10797 |
| N  | 11.00422  | -0.95418 | 0.26146  |
| C  | 11.20585  | -0.61195 | 1.67516  |
| H  | 12.06845  | 0.05669  | 1.74667  |
| H  | 10.33098  | -0.08087 | 2.05001  |
| H  | 11.38539  | -1.49455 | 2.30469  |

|   |          |          |          |
|---|----------|----------|----------|
| C | 12.15827 | -1.65328 | -0.319   |
| H | 13.03587 | -1.01148 | -0.20986 |
| H | 12.37378 | -2.61387 | 0.17172  |
| H | 11.98263 | -1.83161 | -1.38063 |

**T32: symmetry c1            -9175.7413647**

0 1

|   |          |          |          |
|---|----------|----------|----------|
| S | -0.23704 | -1.746   | -0.0842  |
| S | -3.16465 | -1.62291 | 0.70538  |
| S | -6.42994 | -1.62842 | 0.19745  |
| C | -1.66103 | -0.75946 | 0.29275  |
| C | -4.1518  | -0.14142 | 0.62586  |
| C | -5.47859 | -0.14401 | 0.39742  |
| C | -7.87048 | -0.77483 | -0.43257 |
| S | -0.28161 | 1.6441   | 0.13384  |
| S | -3.20247 | 1.34125  | 0.90585  |
| S | -6.44359 | 1.35834  | 0.36418  |
| C | -1.67746 | 0.5821   | 0.38142  |
| C | -7.87403 | 0.56833  | -0.33669 |
| S | 2.76168  | -0.21525 | 1.72128  |
| S | 5.66955  | 0.61897  | 1.49264  |
| S | 8.94064  | 0.23918  | 1.38337  |
| C | 4.14092  | 0.18558  | 0.68645  |
| C | 6.60148  | 0.59142  | -0.02446 |
| C | 7.93731  | 0.43515  | -0.07526 |
| C | 10.37545 | -0.3286  | 0.50662  |



|    |           |          |          |
|----|-----------|----------|----------|
| S  | 2.67402   | 0.02777  | -1.66538 |
| S  | 5.59249   | 0.8257   | -1.47233 |
| S  | 8.87926   | 0.44696  | -1.57872 |
| C  | 4.10719   | 0.28004  | -0.65452 |
| C  | 10.35849  | -0.22557 | -0.83667 |
| S  | 11.66854  | -0.91793 | 1.55868  |
| H  | 12.56973  | -1.02537 | 0.55709  |
| S  | -9.13645  | -1.69448 | -1.23667 |
| Ge | 1.22574   | -0.04353 | 0.06035  |
| S  | 11.66127  | -0.73782 | -1.92463 |
| H  | 12.18459  | 0.4892   | -2.1622  |
| S  | -9.18397  | 1.62703  | -0.89774 |
| N  | -8.69916  | 3.07835  | -0.07976 |
| N  | -9.37718  | -2.95745 | -0.0554  |
| C  | -8.47633  | 4.21251  | -0.98176 |
| H  | -8.01424  | 5.01976  | -0.4072  |
| H  | -7.79203  | 3.91813  | -1.77648 |
| H  | -9.40335  | 4.59703  | -1.43237 |
| C  | -9.51621  | 3.41449  | 1.09053  |
| H  | -9.02754  | 4.23247  | 1.62712  |
| H  | -10.53634 | 3.73021  | 0.82795  |
| H  | -9.57328  | 2.55374  | 1.75613  |
| C  | -10.43967 | -2.66905 | 0.91065  |
| H  | -11.44536 | -2.67806 | 0.46373  |
| H  | -10.40232 | -3.42371 | 1.70165  |
| H  | -10.26378 | -1.69258 | 1.36193  |

|   |           |          |          |
|---|-----------|----------|----------|
| C | -9.49546  | -4.28186 | -0.6681  |
| H | -9.47496  | -5.02968 | 0.12934  |
| H | -10.42606 | -4.41995 | -1.24104 |
| H | -8.64673  | -4.45732 | -1.32882 |

**T33: symmetry c1            -9175.7437607**

0 1

|   |          |          |          |
|---|----------|----------|----------|
| S | 1.48387  | 1.71344  | -0.57117 |
| S | 4.39384  | 1.78558  | 0.27897  |
| S | 7.68764  | 1.69566  | -0.02129 |
| C | 2.89084  | 0.85278  | 0.07374  |
| C | 5.37181  | 0.33987  | 0.63138  |
| C | 6.71166  | 0.30426  | 0.50669  |
| C | 9.06349  | 0.6992   | -0.54197 |
| S | 1.49731  | -1.51058 | 0.50476  |
| S | 4.40668  | -1.03813 | 1.21494  |
| S | 7.71188  | -1.10876 | 0.90497  |
| C | 2.89729  | -0.42307 | 0.4974   |
| C | 9.07889  | -0.58233 | -0.12145 |
| S | -1.41049 | -0.52705 | -1.66332 |
| S | -4.3451  | 0.21589  | -1.81589 |
| S | -7.63178 | -0.17744 | -1.82928 |
| C | -2.86619 | 0.05702  | -0.83767 |
| C | -5.37742 | 0.53419  | -0.40019 |
| C | -6.71368 | 0.37184  | -0.40698 |
| C | -9.02518 | -0.73445 | -0.878   |

|    |           |          |          |
|----|-----------|----------|----------|
| S  | -1.55572  | 0.52398  | 1.56348  |
| S  | -4.47336  | 1.14071  | 1.00891  |
| S  | -7.7673   | 0.7392   | 0.97543  |
| C  | -2.92302  | 0.47525  | 0.4389   |
| C  | -9.0911   | -0.31865 | 0.40348  |
| S  | -10.22346 | -1.69658 | -1.74582 |
| H  | -11.26325 | -1.12962 | -1.06314 |
| S  | 10.31056  | 1.52605  | -1.47774 |
| H  | 11.31453  | 0.81102  | -0.88639 |
| Ge | 0.00329   | 0.08845  | -0.02239 |
| S  | -10.36369 | -0.64427 | 1.57799  |
| S  | 10.32046  | -1.79837 | -0.41295 |
| N  | 11.7747   | -0.92423 | 0.0916   |
| N  | -11.80026 | -0.16523 | 0.66053  |
| C  | 11.96795  | -0.92417 | 1.54726  |
| H  | 12.81824  | -0.27691 | 1.78045  |
| H  | 11.08279  | -0.51247 | 2.03204  |
| H  | 12.16251  | -1.92784 | 1.95016  |
| C  | 12.94026  | -1.44887 | -0.63195 |
| H  | 13.80826  | -0.84037 | -0.36678 |
| H  | 13.16792  | -2.49615 | -0.38417 |
| H  | 12.77022  | -1.37008 | -1.70647 |
| C  | -12.96657 | -0.91353 | 1.14732  |
| H  | -13.23101 | -0.67364 | 2.18777  |
| H  | -13.82068 | -0.66382 | 0.51318  |
| H  | -12.77268 | -1.98419 | 1.07097  |

|   |           |         |          |
|---|-----------|---------|----------|
| C | -12.02212 | 1.28632 | 0.66003  |
| H | -12.8576  | 1.50557 | -0.01095 |
| H | -12.25362 | 1.68106 | 1.65908  |
| H | -11.13505 | 1.79008 | 0.27614  |

**T34: symmetry c1            -9309.6571512**

0 1

|   |          |          |          |
|---|----------|----------|----------|
| S | 0.96032  | 1.65649  | -0.08725 |
| S | 3.89401  | 1.5171   | 0.6715   |
| S | 7.15743  | 1.59886  | 0.22246  |
| C | 2.39947  | 0.66499  | 0.20998  |
| C | 4.8981   | 0.05317  | 0.51235  |
| C | 6.22907  | 0.08488  | 0.31275  |
| C | 8.62643  | 0.80509  | -0.41365 |
| S | 1.04028  | -1.73664 | -0.08174 |
| S | 3.96356  | -1.45481 | 0.68718  |
| S | 7.22473  | -1.39129 | 0.23982  |
| C | 2.43025  | -0.67949 | 0.21535  |
| C | 8.65712  | -0.54092 | -0.39657 |
| S | -1.94148 | -0.02278 | 1.75727  |
| S | -4.86852 | -0.7994  | 1.60462  |
| S | -8.16056 | -0.46304 | 1.66122  |
| C | -3.36954 | -0.34013 | 0.75969  |
| C | -5.86727 | -0.67142 | 0.13607  |
| C | -7.2057  | -0.53011 | 0.16076  |
| C | -9.53987 | 0.35927  | 0.90098  |

|    |           |          |          |
|----|-----------|----------|----------|
| S  | -2.00619  | -0.03963 | -1.64122 |
| S  | -4.92681  | -0.80391 | -1.37    |
| S  | -8.22605  | -0.45076 | -1.29156 |
| C  | -3.39651  | -0.34375 | -0.58435 |
| C  | -9.57334  | 0.36874  | -0.44741 |
| S  | -10.76749 | 0.99412  | 1.9986   |
| H  | -11.78594 | 0.66716  | 1.14782  |
| S  | 9.88737   | 1.8184   | -1.11343 |
| Ge | -0.48489  | -0.06564 | 0.01904  |
| S  | -10.82103 | 1.04782  | -1.48998 |
| S  | 9.98083   | -1.53029 | -1.02645 |
| N  | 9.69859   | -2.95998 | -0.07826 |
| N  | 9.7725    | 3.17454  | -0.02541 |
| N  | -12.27519 | 0.303    | -0.8085  |
| C  | 9.64935   | -4.1839  | -0.88205 |
| H  | 9.29503   | -4.99739 | -0.2433  |
| H  | 8.94378   | -4.05493 | -1.70205 |
| H  | 10.62761  | -4.47337 | -1.29511 |
| C  | 10.55461  | -3.07473 | 1.10632  |
| H  | 10.18645  | -3.90281 | 1.71858  |
| H  | 11.60963  | -3.2635  | 0.85944  |
| H  | 10.48812  | -2.1594  | 1.69392  |
| C  | 10.7223   | 3.12784  | 1.08942  |
| H  | 11.76663  | 3.26823  | 0.77329  |
| H  | 10.46221  | 3.91963  | 1.79772  |
| H  | 10.63487  | 2.16969  | 1.60146  |

|   |           |          |          |
|---|-----------|----------|----------|
| C | 9.76036   | 4.4615   | -0.72451 |
| H | 9.51533   | 5.2415   | 0.00137  |
| H | 10.72594  | 4.71694  | -1.18791 |
| H | 8.99053   | 4.45188  | -1.49557 |
| C | -13.43393 | 1.17111  | -1.05586 |
| H | -13.67253 | 1.28019  | -2.12413 |
| H | -14.30138 | 0.73233  | -0.55685 |
| H | -13.24777 | 2.15962  | -0.63399 |
| C | -12.4899  | -1.071   | -1.28001 |
| H | -13.34128 | -1.49121 | -0.73693 |
| H | -12.69363 | -1.12314 | -2.35857 |
| H | -11.61059 | -1.67471 | -1.05558 |

**T35: symmetry c1      -9443.5705262**

0 1

|   |         |          |          |
|---|---------|----------|----------|
| S | 1.51277 | 1.01642  | 1.3598   |
| S | 4.43136 | 0.21768  | 1.60738  |
| S | 7.69034 | 0.57107  | 1.31224  |
| C | 2.90594 | 0.15344  | 0.68815  |
| C | 5.37773 | -0.51345 | 0.28566  |
| C | 6.70926 | -0.36562 | 0.15302  |
| C | 9.12388 | 0.60432  | 0.25606  |
| S | 1.45827 | -0.94549 | -1.41088 |
| S | 4.38379 | -1.49241 | -0.82332 |
| S | 7.6524  | -1.16981 | -1.11949 |
| C | 2.88535 | -0.6215  | -0.41051 |

|    |           |          |          |
|----|-----------|----------|----------|
| C  | 9.10708   | -0.16553 | -0.84845 |
| S  | -1.48157  | 1.35621  | -0.98862 |
| S  | -4.4057   | 1.64751  | -0.23231 |
| S  | -7.66481  | 1.40168  | -0.63878 |
| C  | -2.89809  | 0.70148  | -0.14736 |
| C  | -5.38446  | 0.34001  | 0.48171  |
| C  | -6.71531  | 0.22862  | 0.31194  |
| C  | -9.10966  | 0.36067  | -0.70295 |
| S  | -1.50286  | -1.42883 | 0.95518  |
| S  | -4.42372  | -0.78616 | 1.47385  |
| S  | -7.68982  | -1.0299  | 1.10165  |
| C  | -2.90546  | -0.39939 | 0.62456  |
| C  | -9.12057  | -0.74276 | 0.06837  |
| S  | -10.3965  | 0.82455  | -1.82792 |
| S  | 10.4421   | 1.69733  | 0.71186  |
| Ge | -0.00346  | -0.00829 | 0.02263  |
| S  | -10.39575 | -1.95667 | 0.03524  |
| S  | 10.36977  | -0.15095 | -2.07468 |
| N  | 10.41592  | -1.85537 | -2.44301 |
| N  | 10.05416  | 1.86835  | 2.39613  |
| N  | -10.43765 | -2.35254 | 1.73286  |
| N  | -10.01292 | 2.51339  | -1.96476 |
| C  | 10.47096  | -2.1181  | -3.88253 |
| H  | 10.32688  | -3.19055 | -4.03903 |
| H  | 9.66443   | -1.58356 | -4.38382 |
| H  | 11.42869  | -1.83154 | -4.34475 |

|   |           |          |          |
|---|-----------|----------|----------|
| C | 11.41847  | -2.60188 | -1.67878 |
| H | 11.25942  | -3.67022 | -1.85139 |
| H | 12.45203  | -2.35039 | -1.9603  |
| H | 11.28518  | -2.40459 | -0.61513 |
| C | 10.88977  | 1.06378  | 3.29277  |
| H | 11.92872  | 1.42011  | 3.34902  |
| H | 10.45429  | 1.10177  | 4.29524  |
| H | 10.89021  | 0.02657  | 2.95897  |
| C | 9.92015   | 3.26433  | 2.82217  |
| H | 9.50675   | 3.27422  | 3.83426  |
| H | 10.87701  | 3.80759  | 2.83642  |
| H | 9.22846   | 3.78427  | 2.16047  |
| C | -9.85628  | 2.96131  | -3.35139 |
| H | -9.44676  | 3.97497  | -3.33851 |
| H | -9.15308  | 2.31021  | -3.8693  |
| H | -10.80356 | 2.98063  | -3.91114 |
| C | -10.86784 | 3.39334  | -1.16218 |
| H | -10.43579 | 4.39796  | -1.1747  |
| H | -11.89982 | 3.45157  | -1.53805 |
| H | -10.88746 | 3.04212  | -0.13092 |
| C | -11.43882 | -1.60188 | 2.49506  |
| H | -12.47266 | -1.88199 | 2.24337  |
| H | -11.27511 | -1.79074 | 3.55993  |
| H | -11.30877 | -0.53505 | 2.31368  |
| C | -10.48829 | -3.7961  | 1.97416  |
| H | -10.34089 | -3.96819 | 3.04375  |



|   |           |          |         |
|---|-----------|----------|---------|
| H | -11.44569 | -4.25611 | 1.68328 |
| H | -9.68197  | -4.28722 | 1.43003 |

**T36: symmetry c1            -9065.1056921**

0 1

|   |          |          |          |
|---|----------|----------|----------|
| S | 1.39657  | 1.13777  | -1.08354 |
| S | 4.30727  | 0.56387  | -1.70924 |
| S | 7.60472  | 0.88442  | -1.56018 |
| C | 2.85017  | 0.17584  | -0.76183 |
| C | 5.35614  | -0.48733 | -0.72513 |
| C | 6.69373  | -0.35149 | -0.66658 |
| C | 9.04386  | 0.79621  | -0.50396 |
| S | 1.57185  | -1.51966 | 1.02545  |
| S | 4.46115  | -1.76614 | 0.13334  |
| S | 7.75981  | -1.42679 | 0.26237  |
| C | 2.91866  | -0.87722 | 0.07124  |
| C | 9.1153   | -0.26382 | 0.3312   |
| S | -1.5623  | -1.27138 | -1.28057 |
| S | -4.46186 | -1.71129 | -0.50405 |
| S | -7.75575 | -1.33013 | -0.60805 |
| C | -2.92025 | -0.8651  | -0.21862 |
| C | -5.36875 | -0.65832 | 0.61042  |
| C | -6.70475 | -0.50396 | 0.56196  |
| C | -9.10454 | -0.17023 | -0.43545 |
| S | -1.4164  | 0.83069  | 1.38632  |
| S | -4.33435 | 0.13315  | 1.82577  |

|    |           |          |          |
|----|-----------|----------|----------|
| S  | -7.62926  | 0.5012   | 1.69793  |
| C  | -2.86358  | -0.03186 | 0.83485  |
| C  | -9.04617  | 0.67007  | 0.62136  |
| S  | -10.46688 | -0.342   | -1.54431 |
| S  | 10.31462  | 1.99212  | -0.76887 |
| Ge | -0.00306  | -0.24948 | 0.00653  |
| S  | -10.317   | 1.78528  | 1.12792  |
| S  | 10.49774  | -0.69187 | 1.34139  |
| C  | -9.44786  | 3.40106  | 1.02974  |
| H  | -9.14275  | 3.60712  | 0.00489  |
| H  | -10.17937 | 4.14418  | 1.3491   |
| H  | -8.58872  | 3.4308   | 1.69766  |
| C  | -9.68019  | 0.04562  | -3.15867 |
| H  | -10.47677 | -0.04488 | -3.89802 |
| H  | -9.29638  | 1.06469  | -3.15988 |
| H  | -8.88734  | -0.66186 | -3.39512 |
| C  | 9.4589    | 3.54782  | -0.29638 |
| H  | 9.16527   | 3.5169   | 0.75181  |
| H  | 10.19324  | 4.34     | -0.44648 |
| H  | 8.59366   | 3.73365  | -0.93036 |
| C  | 9.75017   | -0.66868 | 3.01948  |
| H  | 10.55917  | -0.93462 | 3.70077  |
| H  | 9.385     | 0.32875  | 3.25962  |
| H  | 8.9493    | -1.4007  | 3.10816  |
